# Supplementary material for: Activation of the CP bond in phosphanylphosphaalkenes (CP–P bond system) in the reaction with nucleophilic reagents: MeLi, nBuLi and tBuLi
Source: Royal Society of Chemistry journal article supplement (doi:10.1039/d1ra09215d), 2022-01-01
Supplement: d1ra09215d1.pdf [file d1ra09215d1.pdf]

# Activation of C=P bond in phosphanylphosphaalkenes (C=P–P bond system) in the reaction with nucleophilic reagents: MeLi, *n*BuLi and *t*BuLi

Aleksandra Ziólkowska, Natalia Szynkiewicz, Łukasz Ponikiewski\*

Department of Inorganic Chemistry, Chemical Faculty, Gdansk University of Technology, 11/12 Gabriela Narutowicza Str, 80-233 Gdansk, Poland.

|                                                                                                                                      |    |
|--------------------------------------------------------------------------------------------------------------------------------------|----|
| PART A. X-ray data .....                                                                                                             | 2  |
| PART B. NMR spectra .....                                                                                                            | 5  |
| 1. Reaction of (biph)(H)C=P–P <i>t</i> Bu <sub>2</sub> .....                                                                         | 5  |
| a) with MeLi .....                                                                                                                   | 5  |
| b) with <i>n</i> BuLi .....                                                                                                          | 25 |
| c) with <i>t</i> BuLi .....                                                                                                          | 31 |
| 2. Reaction of (3,5- <i>t</i> Bu <sub>2</sub> C <sub>6</sub> H <sub>3</sub> )(H)C=P–P <i>t</i> Bu <sub>2</sub> (3) .....             | 34 |
| a) with MeLi .....                                                                                                                   | 34 |
| b) with <i>n</i> BuLi .....                                                                                                          | 38 |
| a) with <i>t</i> BuLi .....                                                                                                          | 42 |
| 3. Reaction of ( <i>p</i> -Me <sub>2</sub> N-C <sub>6</sub> H <sub>4</sub> )(H)C=P–P <i>t</i> Bu <sub>2</sub> (4) .....              | 46 |
| a) with MeLi .....                                                                                                                   | 46 |
| b) with <i>n</i> BuLi .....                                                                                                          | 50 |
| c) with <i>t</i> BuLi .....                                                                                                          | 54 |
| 4. NMR spectra of isolated (3,5- <i>t</i> Bu <sub>2</sub> C <sub>6</sub> H <sub>3</sub> )(H)C=P–P <i>t</i> Bu <sub>2</sub> (3) ..... | 59 |
| PART C. DFT calculation details .....                                                                                                | 64 |
| D.1. General methods .....                                                                                                           | 64 |
| D.2. Thermodynamics of considered reactions .....                                                                                    | 65 |
| D.3. Electrostatic potential map and Mulliken atomic charges of 1a* .....                                                            | 66 |
| D.4. Optimized structures and Cartesian coordinates .....                                                                            | 68 |
| PART D. References .....                                                                                                             | 79 |

## PART A. X-ray data

The X-ray intensity data for **1a\***, **2\_1** and **3** were measured with an IPDS2T diffractometer equipped with an STOE image plate detector system and microfocus X-ray sources providing  $K\alpha$  radiation by high-grade multi-layer X-ray mirror optics for Mo ( $\lambda = 0.71073 \text{ \AA}$ ) wavelengths. The measurements were carried out at 120 K. The structures of the compounds were solved by direct methods and refined against  $F^2$  with the Shelxs-2008 and Shelxl-2008 programs<sup>1</sup> run under WinGX.<sup>2</sup> Non-hydrogen atoms were refined with anisotropic displacement parameters. The isotropic displacement parameters of all hydrogens were fixed to  $1.2 U_{\text{eq}}$  for aromatic, CH, CH<sub>2</sub> (1.5 times for methyl) groups.

The crystallographic data for the structures of **1a\***, **2\_1** and **3** reported in this paper have been deposited in the Cambridge Crystallographic Data Centre as supplementary publication No. CCDC 2114106, 2114107 and 2163558. Copies of the data can be obtained free of charge upon application to the CCDC, 12 Union Road, Cambridge CB2 1EZ, UK (Fax: (+44) 1223-336-033; E mail: deposit@ccdc.cam.ac.uk).

**Table S1.** Crystallographic data for **1a\***, **2\_1** and **3**.

|                                                  | <b>1a*</b>                                                                     | <b>2_1</b>                                                                    | <b>3</b>                                                          |
|--------------------------------------------------|--------------------------------------------------------------------------------|-------------------------------------------------------------------------------|-------------------------------------------------------------------|
| Empirical formula                                | C <sub>84</sub> H <sub>118</sub> Li <sub>2</sub> O <sub>6</sub> P <sub>6</sub> | C <sub>41</sub> H <sub>76</sub> Li <sub>1</sub> O <sub>6</sub> P <sub>3</sub> | C <sub>23</sub> H <sub>40</sub> P <sub>2</sub>                    |
| Formula weight                                   | 1423.48                                                                        | 764.86                                                                        | 378.49                                                            |
| Radiation source                                 | Mo- <i>K</i> α                                                                 | Mo- <i>K</i> α                                                                | Mo- <i>K</i> α                                                    |
| Wavelength [Å]                                   | 0.71073                                                                        | 0.71073                                                                       | 0.71073                                                           |
| Crystal System                                   | triclinic                                                                      | triclinic                                                                     | orthorhombic                                                      |
| Space group                                      | <i>P</i> -1                                                                    | <i>P</i> -1                                                                   | <i>P</i> 2 <sub>1</sub> 2 <sub>1</sub> 2 <sub>1</sub>             |
| <i>a</i> [Å]                                     | 12.1986(5)                                                                     | 11.4465(8)                                                                    | 11.8649(3)                                                        |
| <i>b</i> [Å]                                     | 19.2100(8)                                                                     | 15.6595(16)                                                                   | 12.6361(4)                                                        |
| <i>c</i> [Å]                                     | 20.5903(9)                                                                     | 16.0158(10)                                                                   | 15.6655(4)                                                        |
| <i>α</i> [°]                                     | 115.094(3)                                                                     | 61.528(6)                                                                     | 90                                                                |
| <i>β</i> [°]                                     | 100.381(3)                                                                     | 71.074(5)                                                                     | 90                                                                |
| <i>γ</i> [°]                                     | 98.093(3)                                                                      | 68.526(7)                                                                     | 90                                                                |
| <i>V</i> [Å <sup>3</sup> ]                       | 4168.4(3)                                                                      | 2308.7(4)                                                                     | 2348.67(11)                                                       |
| <i>Z</i>                                         | 2                                                                              | 2                                                                             | 4                                                                 |
| Calculated Density [g·cm <sup>-1</sup> ]         | 1.134                                                                          | 1.100                                                                         | 1.07                                                              |
| <i>T</i> [K]                                     | 120(2)                                                                         | 120(2)                                                                        | 120(2)                                                            |
| <i>μ</i> [mm <sup>-1</sup> ]                     | 0.177                                                                          | 0.169                                                                         | 0.189                                                             |
| Theta range for data collection [°]              | 2.23-29.52                                                                     | 2.65-29.51                                                                    | 2.35-29.35                                                        |
| Index ranges                                     | -16 ≤ <i>h</i> ≤ 16<br>-25 ≤ <i>k</i> ≤ 25<br>-27 ≤ <i>l</i> ≤ 27              | -13 ≤ <i>h</i> ≤ 15<br>-20 ≤ <i>k</i> ≤ 20<br>-21 ≤ <i>l</i> ≤ 21             | -15 ≤ <i>h</i> ≤ 15<br>-16 ≤ <i>k</i> ≤ 16<br>-19 ≤ <i>l</i> ≤ 20 |
| Data / restraints / parameters                   | 19849/0/905                                                                    | 11083/0/478                                                                   | 5657/0/238                                                        |
| Goodness-of-fit on <i>F</i> <sup>2</sup>         | 1.026                                                                          | 0.967                                                                         | 1.046                                                             |
| Final R indices                                  | 0.0836                                                                         | 0.0468                                                                        | 0.0364                                                            |
| [ <i>I</i> > 2σ( <i>I</i> )]                     | 0.2091                                                                         | 0.1065                                                                        | 0.0784                                                            |
| R indices (all data)                             | 0.1587                                                                         | 0.0910                                                                        | 0.0489                                                            |
| [ <i>I</i> > 2σ( <i>I</i> )] (all data)          | 0.2549                                                                         | 0.1179                                                                        | 0.0828                                                            |
| Largest diff. peak and hole [e.Å <sup>-3</sup> ] | 0.741 and -0.47                                                                | 0.414 and -0.362                                                              | 0.041 and -0.202                                                  |
| CCDC                                             | <b>2114107</b>                                                                 | <b>2114106</b>                                                                | <b>2163558</b>                                                    |

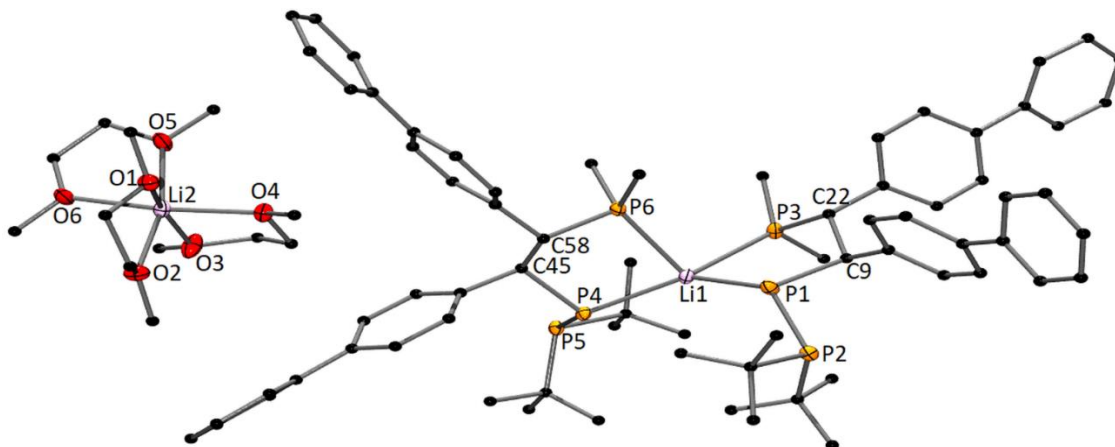

**Figure S1.** Molecular structure of  $[\text{Li}(\text{DME})_3]^+[\text{P}(\text{Me})_2\text{-CH}(\text{biph})\text{-CH}(\text{biph})\text{-P}(\text{PrBu}_2)_2]^-$  (**1a\***) (ellipsoids 30%, the H atoms have been omitted for clarity). Important distances (Å) and angles (deg): Li1-P1 2.479(7), Li1-P3 2.556(6), Li1-P4 2.517(6), Li1-P6 2.531(7), P1-P2 2.1585(15), P4-P5 2.1685(15), C9-C22 1.531(5), C45-C58 1.548(5), Li2-O1 2.174(8), Li2-O2 2.119(8), Li2-O3 2.088(8), Li2-O4 2.146(7), Li2-O5 2.101(8), Li2-O6 2.146(8); P1-Li1-P4 133.7(3), P1-Li1-P3 79.08(19), P1-Li1-P6 108.4(3), P3-Li1-P4 145.6(3), P4-Li1-P6 81.62(19), P2-P1-C9 98.49(13), P5-P4-C45 98.62(13).

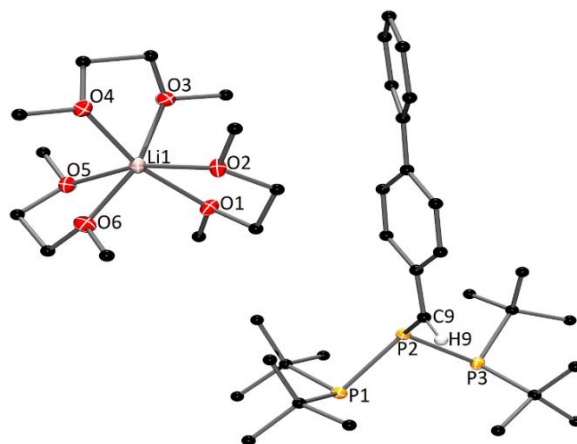

**Figure S2.** The molecular structure of  $[\text{Li}(\text{DME})_3]^+[\text{tBu}_2\text{P-P}\{\text{C}(\text{H})\text{-biph}\}\text{-P}(\text{PrBu}_2)_2]^-$  (**2\_1**) (ellipsoids 30%, the H atoms have been omitted for clarity). Important distances (Å) and angles (deg): P1-P2 2.2465(7), P2-P3 2.2107(7), P2-C9 1.7612(19), Li1-O1 2.140(3), Li1-O2 2.118(4), Li1-O3 2.2107(7), Li1-O4 2.138(3), Li1-O5 2.132(4), Li1-O6 2.121(4); P1-P2-P3 97.39(3), P1-P2-C9 116.20(6), P3-P2-C9 114.27(7).

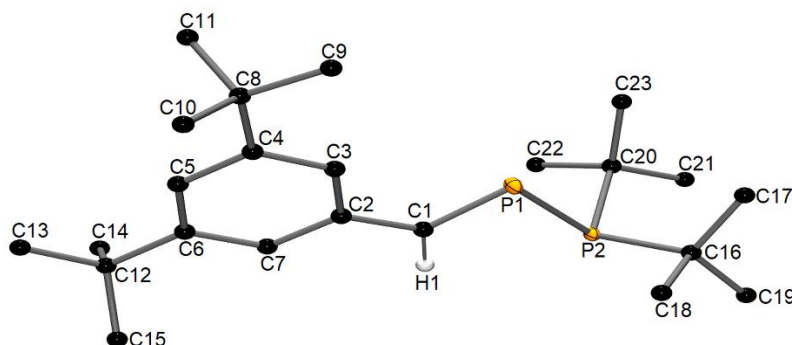

**Figure S3.** Molecular structure of  $(3,5\text{-tBu}_2\text{C}_6\text{H}_3)(\text{H})\text{C}=\text{P-PrBu}_2$  (**3**) (ellipsoids are drawn at the 50% probability level; hydrogen atoms are omitted except H1 atom; carbon atoms are drawn as sphere for clarity). Important distances (Å) and angles (deg): P1-P2 2.2092(8), C1-P1 1.678(2); C1-P1-P2 99.99(8).

## PART B. NMR spectra

1. Reaction of (biph)(H)C=P-PtBu<sub>2</sub> (**1**).

a) with MeLi

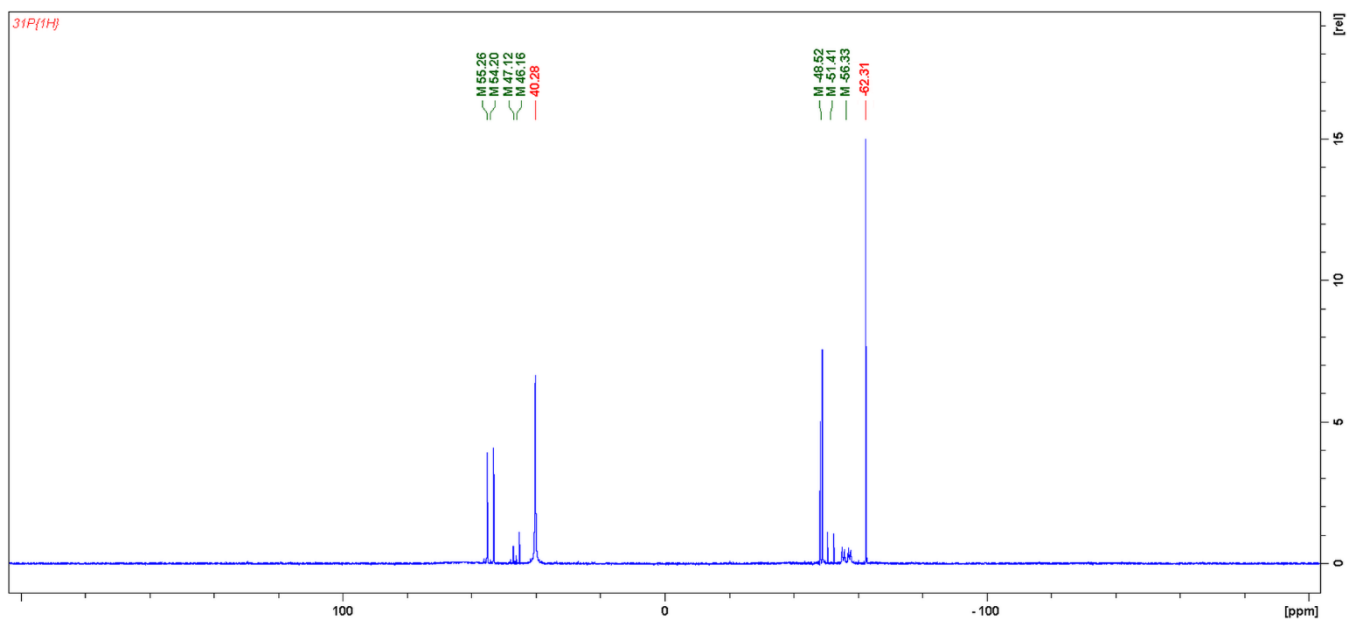

Figure S4. <sup>31</sup>P{<sup>1</sup>H} NMR spectrum of reaction mixture of (biph)(H)C=P-PtBu<sub>2</sub> (**1**) with MeLi in THF-d<sub>8</sub>.

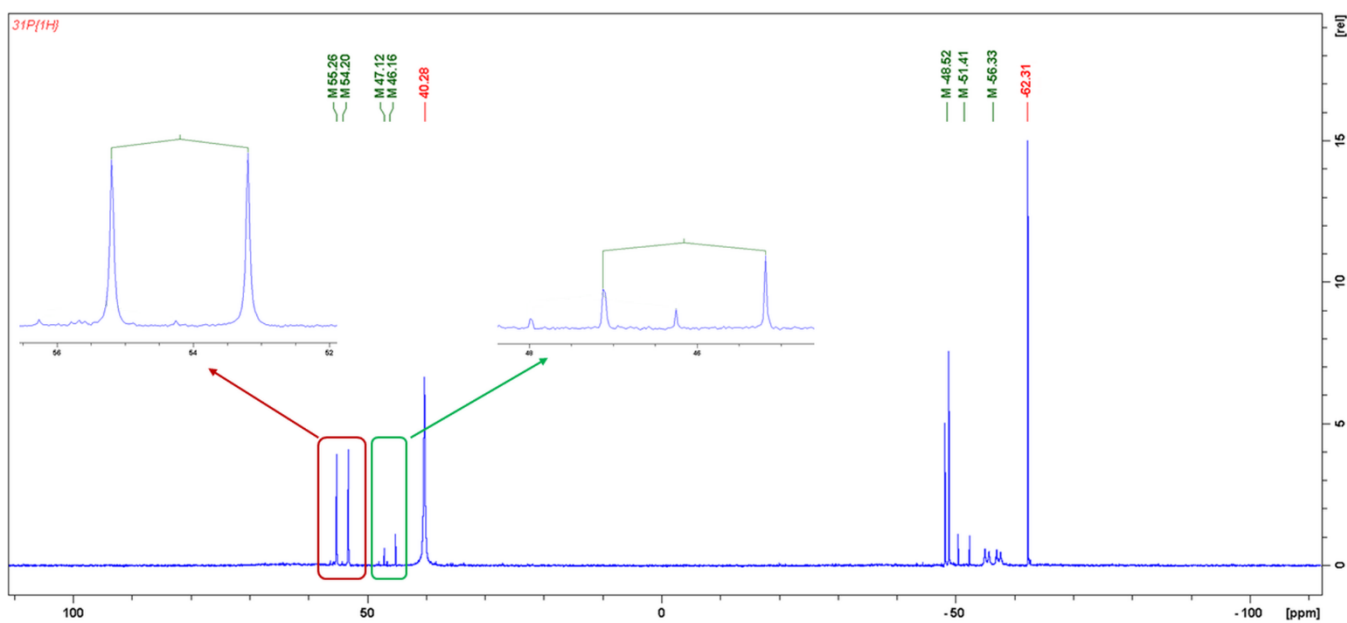

Figure S5. <sup>31</sup>P{<sup>1</sup>H} NMR spectrum of reaction mixture of (biph)(H)C=P-PtBu<sub>2</sub> (**1**) with MeLi in THF-d<sub>8</sub> in narrow range (from 100 ppm to -100 ppm).

**Table S2.** Description of signals observed on the  $^{31}\text{P}\{^1\text{H}\}$  NMR spectrum - **Figure S4** and **S5**.

|                                                                                                                                                                                                                                                                                                                                                                                                                                                                                                                                                                                                                                   |                                                                                                                   |
|-----------------------------------------------------------------------------------------------------------------------------------------------------------------------------------------------------------------------------------------------------------------------------------------------------------------------------------------------------------------------------------------------------------------------------------------------------------------------------------------------------------------------------------------------------------------------------------------------------------------------------------|-------------------------------------------------------------------------------------------------------------------|
|                                                                                                                                                                                                                                                                                                                                                                                                                                                                                                                                                                                                                                   | $[\text{P}(\text{Me})_2\text{-CH}(\text{biph})\text{-CH}(\text{biph})\text{-P}(\text{PtBu}_2)]^-$ ( <b>1a''</b> ) |
| <ul style="list-style-type: none"> <li>➤ 54.20 ppm, d, <math>J_{\text{PP}} = 325.2</math> Hz, <math>[\text{P}(\text{Me})_2\text{-CH}(\text{biph})\text{-CH}(\text{biph})\text{-P}(\text{PtBu}_2)]^-</math>;</li> <li>➤ -48.52 ppm, d, <math>J_{\text{PP}} = 108.4</math> Hz, <math>[\text{P}(\text{Me})_2\text{-CH}(\text{biph})\text{-CH}(\text{biph})\text{-P}(\text{PtBu}_2)]^-</math>;</li> <li>➤ -56.33 ppm, broad dd, <math>J_{\text{PP}} = 325.2</math> Hz, <math>J_{\text{PP}} = 108.4</math> Hz <math>[\text{P}(\text{Me})_2\text{-CH}(\text{biph})\text{-CH}(\text{biph})\text{-P}(\text{PtBu}_2)]^-</math>;</li> </ul> |                                                                                                                   |
|                                                                                                                                                                                                                                                                                                                                                                                                                                                                                                                                                                                                                                   | $[(\text{biph})(\text{H})\text{C-P}(\text{Me})\text{-PtBu}_2]^-$ ( <b>1a</b> )                                    |
| <ul style="list-style-type: none"> <li>➤ 46.16 ppm, d, <math>J_{\text{PP}} = 313.2</math> Hz, <math>[(\text{biph})(\text{H})\text{C-P}(\text{Me})\text{-PtBu}_2]^-</math>;</li> <li>➤ -51.41 ppm, d, <math>J_{\text{PP}} = 313.2</math> Hz, <math>[(\text{biph})(\text{H})\text{C-P}(\text{Me})\text{-PtBu}_2]^-</math>;</li> </ul>                                                                                                                                                                                                                                                                                               |                                                                                                                   |
| $t\text{Bu}_2\text{PLi}$                                                                                                                                                                                                                                                                                                                                                                                                                                                                                                                                                                                                          |                                                                                                                   |
| <ul style="list-style-type: none"> <li>➤ 40.28 ppm, s;</li> </ul>                                                                                                                                                                                                                                                                                                                                                                                                                                                                                                                                                                 |                                                                                                                   |
|                                                                                                                                                                                                                                                                                                                                                                                                                                                                                                                                                                                                                                   | $[(\text{biph})(\text{H})\text{C-P}(\text{Me})_2]^-$ ( <b>1a'</b> )                                               |
| <ul style="list-style-type: none"> <li>➤ -62.31 ppm, s, <math>[(\text{biph})(\text{H})\text{C-P}(\text{Me})_2]^-</math>;</li> </ul>                                                                                                                                                                                                                                                                                                                                                                                                                                                                                               |                                                                                                                   |

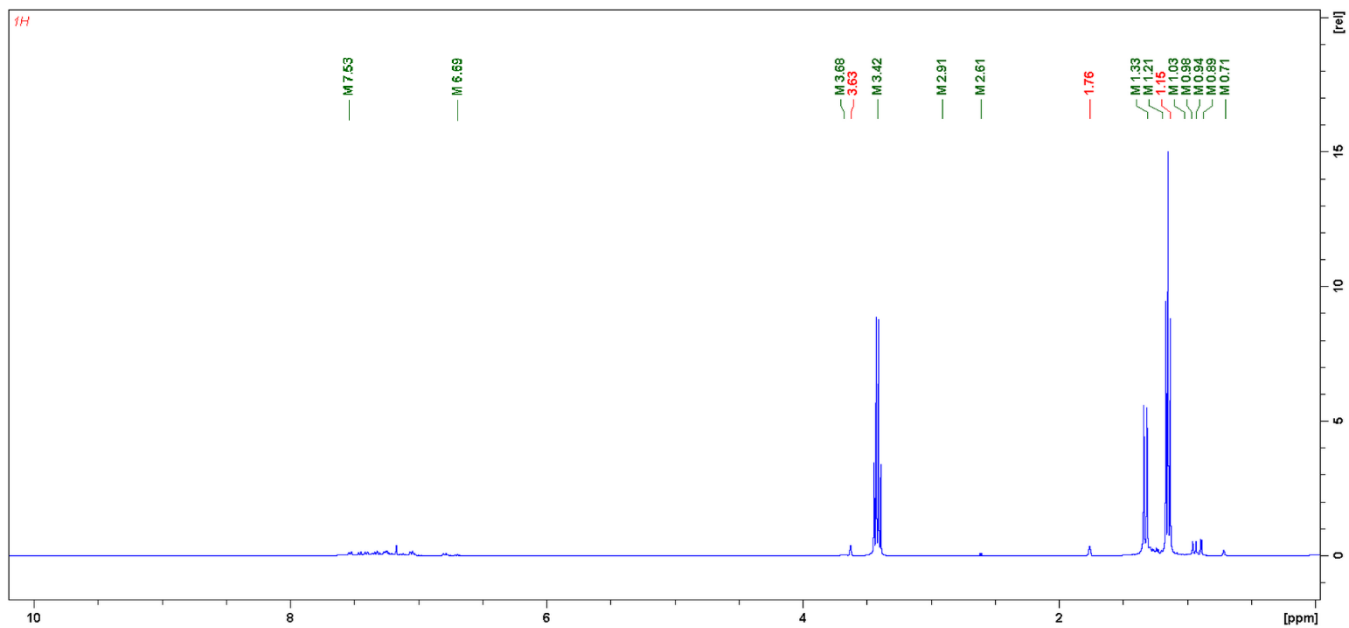

**Figure S6.** <sup>1</sup>H NMR spectrum of reaction mixture of (biph)(H)C=P-PrBu<sub>2</sub> (1) with MeLi in THF-d<sub>8</sub>.

**Table S3.** Description of signals observed on the  $^1\text{H}$  NMR spectrum - **Figure S6.**

|                                                                                                                                                                                                                                                                                                                                                                                                                                     |                                                                                                                  |
|-------------------------------------------------------------------------------------------------------------------------------------------------------------------------------------------------------------------------------------------------------------------------------------------------------------------------------------------------------------------------------------------------------------------------------------|------------------------------------------------------------------------------------------------------------------|
| ➤ 7.53 ppm – 6.69 ppm – aromatic protons;                                                                                                                                                                                                                                                                                                                                                                                           |                                                                                                                  |
| 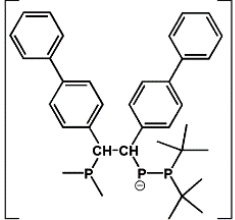                                                                                                                                                                                                                                                                                                                                                   | $[\text{P}(\text{Me})_2\text{-CH}(\text{biph})\text{-CH}(\text{biph})\text{-P}(\text{tBu})_2]^-$ ( <b>1a''</b> ) |
| ➤ 3.68 ppm, broad m, 2H, $[\text{P}(\text{Me})_2\text{-CH}(\text{biph})\text{-CH}(\text{biph})\text{-P}(\text{tBu})_2]^-$ ;<br>➤ 0.94 ppm, d, $J_{\text{PH}} = 10.1$ Hz, 18H, $[\text{P}(\text{Me})_2\text{-CH}(\text{biph})\text{-CH}(\text{biph})\text{-P}(\text{tBu})_2]^-$ ;<br>➤ 0.71 ppm, d, $J_{\text{PH}} = 2.9$ Hz, 6H, $[\text{P}(\text{Me})_2\text{-CH}(\text{biph})\text{-CH}(\text{biph})\text{-P}(\text{tBu})_2]^-$ ; |                                                                                                                  |
|                                                                                                                                                                                                                                                                                                                                                    | $[(\text{biph})(\text{H})\text{C-P}(\text{Me})\text{-tBu}]_2^-$ ( <b>1a</b> )                                    |
| ➤ 2.91 ppm, dd, $J_{\text{PH}} = 7.4$ Hz, $J_{\text{PH}} = 1.9$ Hz, 1H, $[(\text{biph})(\text{H})\text{C-P}(\text{Me})\text{-tBu}]_2^-$ ;<br>➤ 1.21 ppm, d, $J_{\text{PH}} = 10.6$ Hz, 18 H, $[(\text{biph})(\text{H})\text{C-P}(\text{Me})\text{-tBu}]_2^-$ ;<br>➤ 1.03 ppm, d, $J_{\text{PH}} = 3.1$ Hz, 3H, $[(\text{biph})(\text{H})\text{C-P}(\text{Me})\text{-tBu}]_2^-$ ;                                                    |                                                                                                                  |
| $t\text{Bu}_2\text{PLi}$                                                                                                                                                                                                                                                                                                                                                                                                            |                                                                                                                  |
| ➤ 1.33 ppm, d, $J_{\text{PH}} = 10.1$ Hz, $t\text{Bu}_2\text{PLi}$ ;                                                                                                                                                                                                                                                                                                                                                                |                                                                                                                  |
|                                                                                                                                                                                                                                                                                                                                                   | $[(\text{biph})(\text{H})\text{C-P}(\text{Me})_2]^-$ ( <b>1a'</b> )                                              |
| ➤ 2.61 ppm, d, $J_{\text{PH}} = 5.2$ Hz, 1H, $[(\text{biph})(\text{H})\text{C-P}(\text{Me})_2]^-$ ;<br>➤ 0.98 ppm, d, $J_{\text{PH}} = 2.4$ Hz, 3H, $[(\text{biph})(\text{H})\text{C-P}(\text{Me})_2]^-$ ;<br>➤ 0.89 ppm, d, $J_{\text{PH}} = 2.9$ Hz, 3H, $[(\text{biph})(\text{H})\text{C-P}(\text{Me})_2]^-$ ;                                                                                                                   |                                                                                                                  |
| $[\text{Li}(\text{DME})_3]^+$                                                                                                                                                                                                                                                                                                                                                                                                       |                                                                                                                  |
| ➤ 3.42 ppm, q, $J_{\text{HH}} = 7.1$ Hz;<br>➤ 1.15 ppm, t, $J_{\text{HH}} = 7.1$ Hz;                                                                                                                                                                                                                                                                                                                                                |                                                                                                                  |
| Additional signals of small amounts of THF (from THF-d <sub>8</sub> ) were visible at – 3.63 ppm and 1.76 ppm.                                                                                                                                                                                                                                                                                                                      |                                                                                                                  |



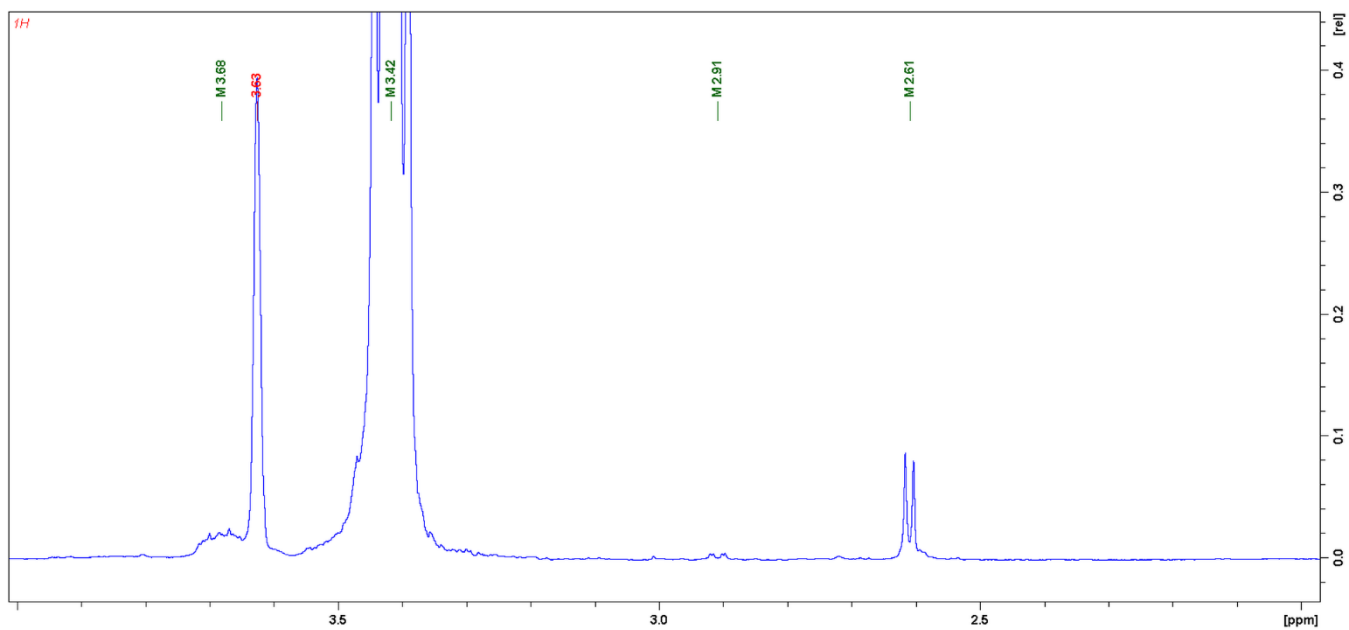

**Figure S7.** <sup>1</sup>H NMR spectrum of reaction mixture of (biph)(H)C=P-PtBu<sub>2</sub> (**1**) with MeLi in THF-d<sub>8</sub> in the range from 4 ppm to 2 ppm.

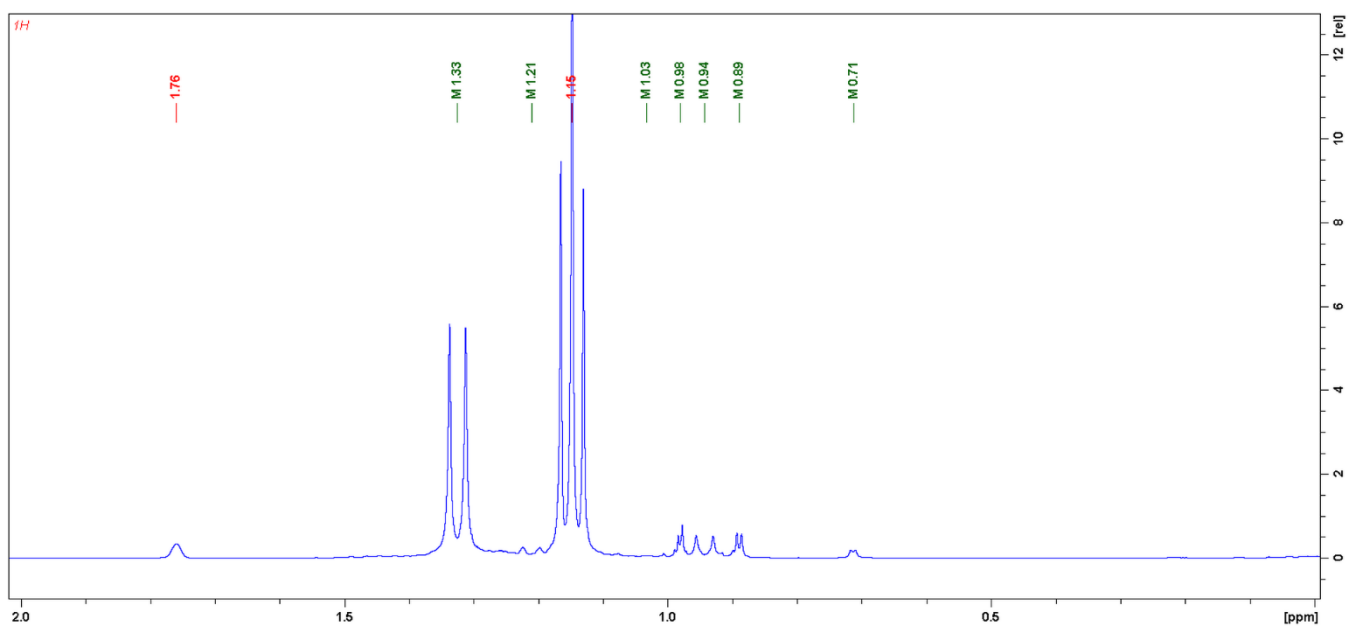

**Figure S8.** <sup>1</sup>H NMR spectrum of reaction mixture of (biph)(H)C=P-PtBu<sub>2</sub> (**1**) with MeLi in THF-d<sub>8</sub> in the range from 2 ppm to 0 ppm.

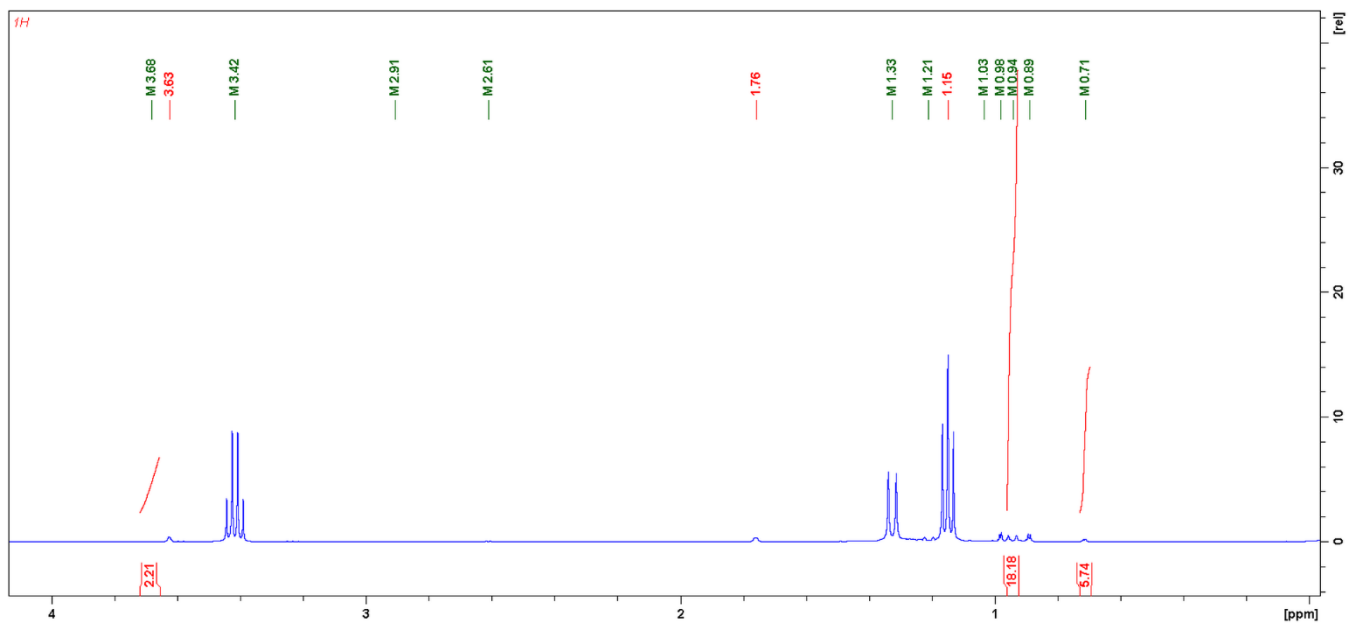

**Figure S9.** <sup>1</sup>H NMR spectrum of reaction mixture of (biph)(H)C=P-PtBu<sub>2</sub> (**1**) with MeLi in THF-d<sub>8</sub> in the range from 4 ppm to 0 ppm with marked integration for [P(Me)<sub>2</sub>-CH(biph)-CH(biph)-P-(PtBu<sub>2</sub>)]<sup>-</sup> (**1a''**).

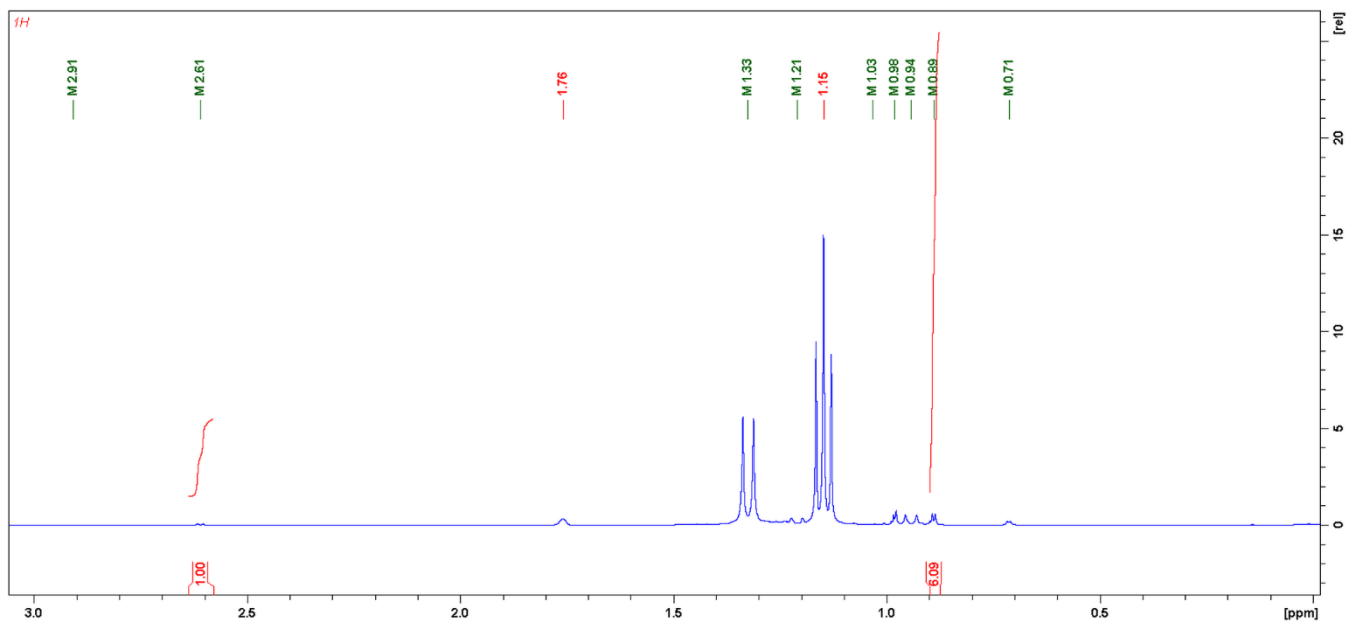

**Figure S10.** <sup>1</sup>H NMR spectrum of reaction mixture of (biph)(H)C=P-PtBu<sub>2</sub> (**1**) with MeLi in THF-d<sub>8</sub> in the range from 4 ppm to 0 ppm with marked integration for [(biph)(H)C-P(Me)<sub>2</sub>]<sup>-</sup> (**1a'**).

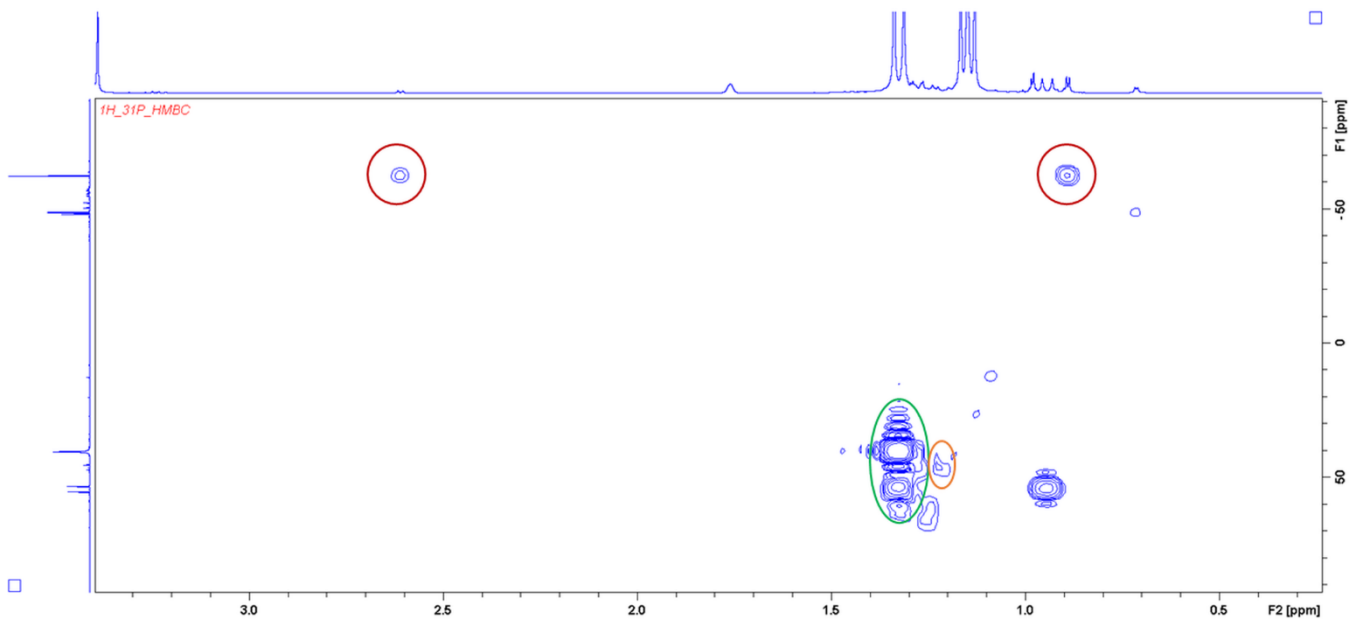

**Figure S11.**  $^{31}\text{P}\{^1\text{H}\}/^1\text{H}$  HMQC NMR spectrum presenting the correlation of protons from *t*Bu groups with phosphorus atom in  $[(\text{biph})(\text{H})\text{C}-\text{P}(\text{Me})-\text{P}t\text{Bu}_2]^-$  (**1a**, orange color ring); correlation of protons from *t*Bu groups with phosphorus atom in *t*Bu<sub>2</sub>PLi (green); correlation of protons from methine and methyl groups with phosphorus atom in  $[(\text{biph})(\text{H})\text{C}-\text{P}(\text{Me})_2]^-$  (**1a'**, red);

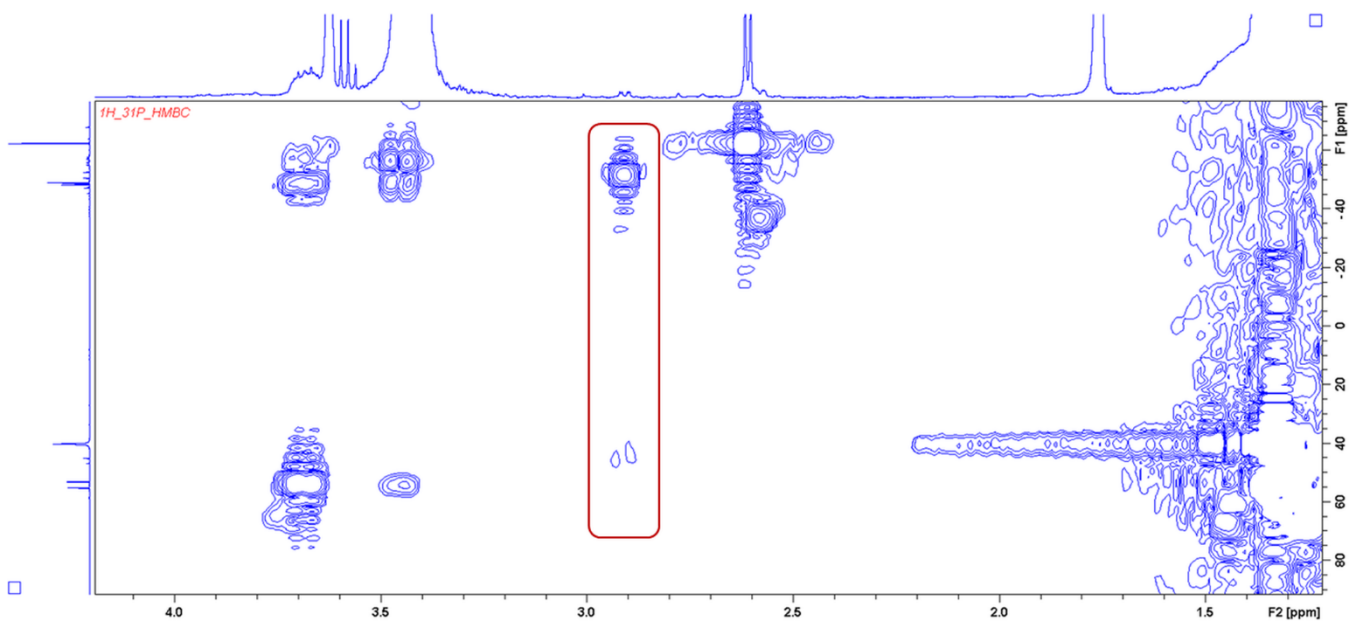

**Figure S12.**  $^{31}\text{P}\{^1\text{H}\}/^1\text{H}$  HMQC NMR spectrum presenting the correlation of methine protons with phosphorus atom in  $[(\text{biph})(\text{H})\text{C}-\text{P}(\text{Me})-\text{P}t\text{Bu}_2]^-$  (**1a**).

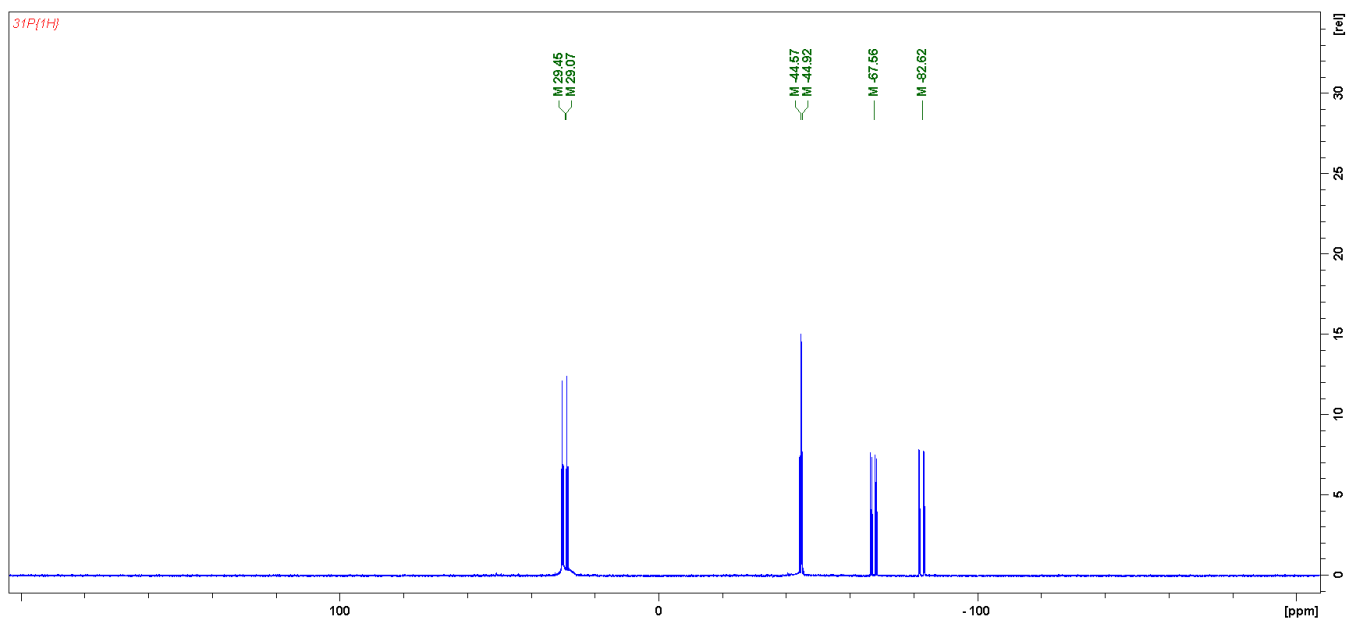

**Figure S13.**  $^{31}\text{P}\{^1\text{H}\}$  NMR spectrum of isolated crystals of **1a\*** dissolved in THF- $d_8$ .

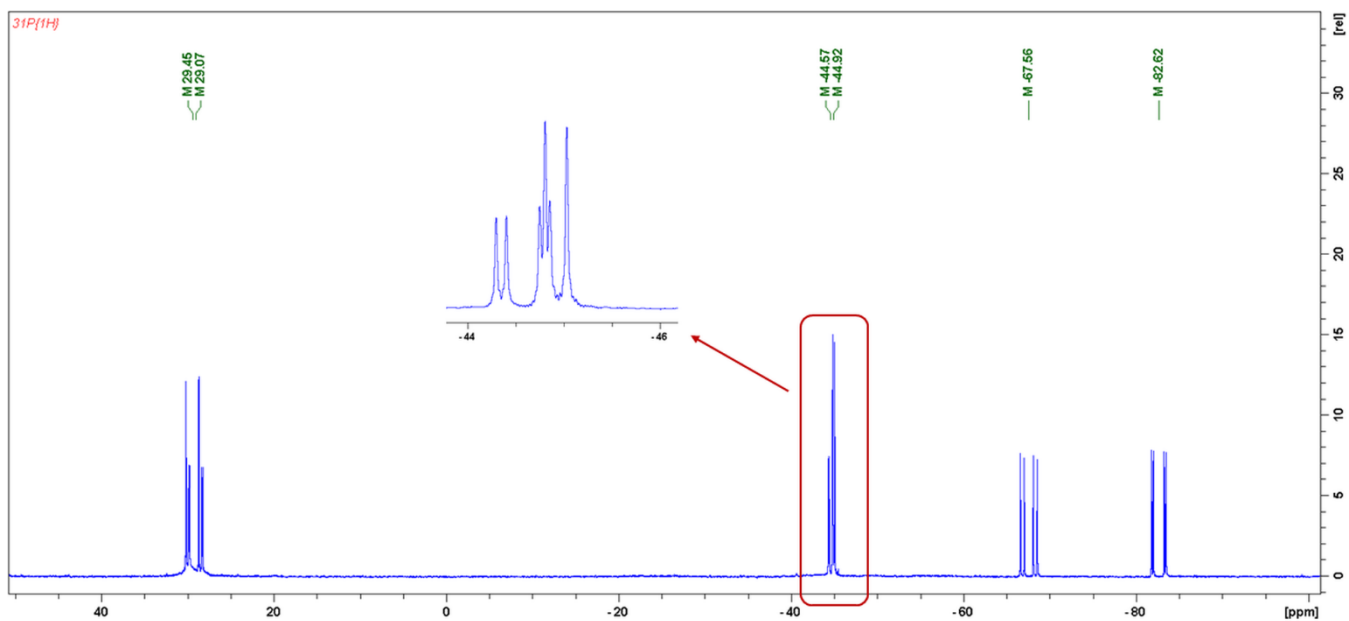

**Figure S14.**  $^{31}\text{P}\{^1\text{H}\}$  NMR spectrum of isolated crystals of **1a\*** dissolved in THF- $d_8$  in the range from 50 ppm to -100 ppm.

**Table S4.** Description of signals observed on the  $^{31}\text{P}\{^1\text{H}\}$  NMR spectrum of isolated crystals of **1a\***- **Figure S13** and **S14**.

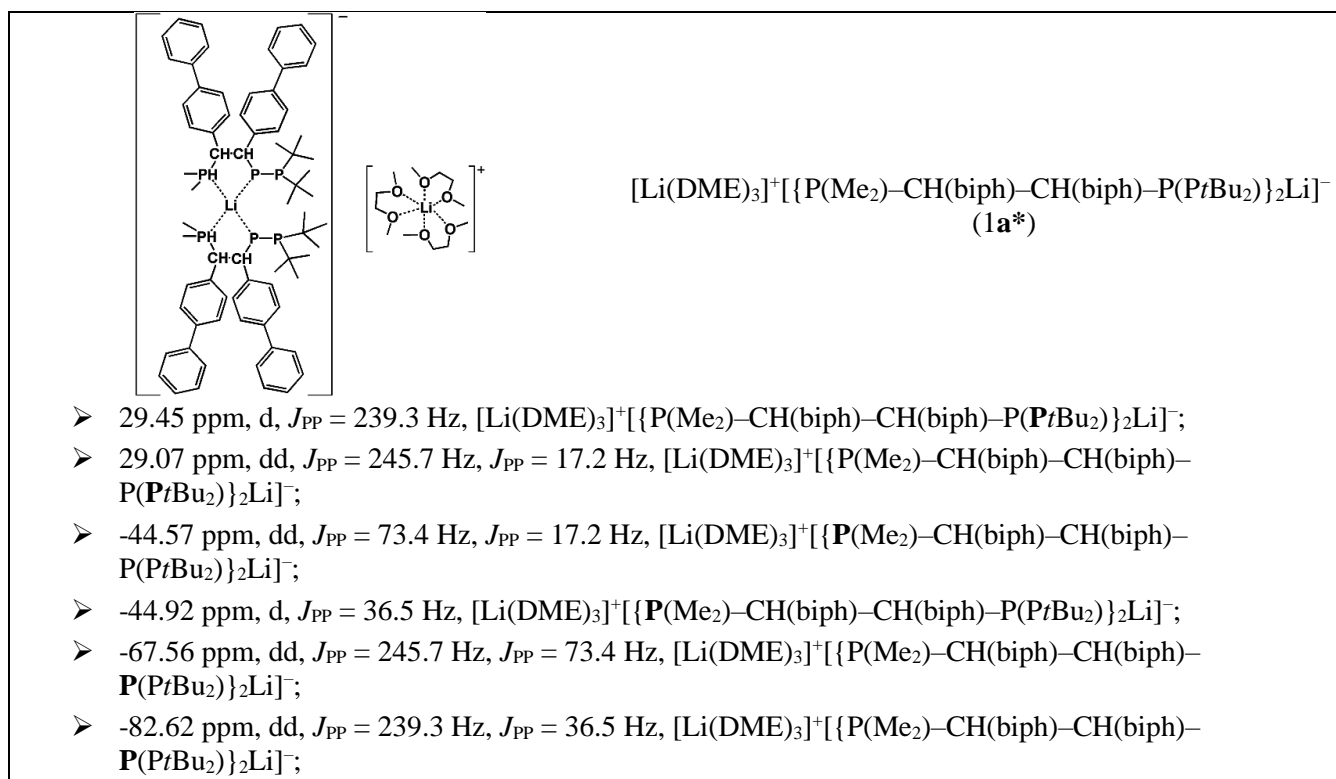

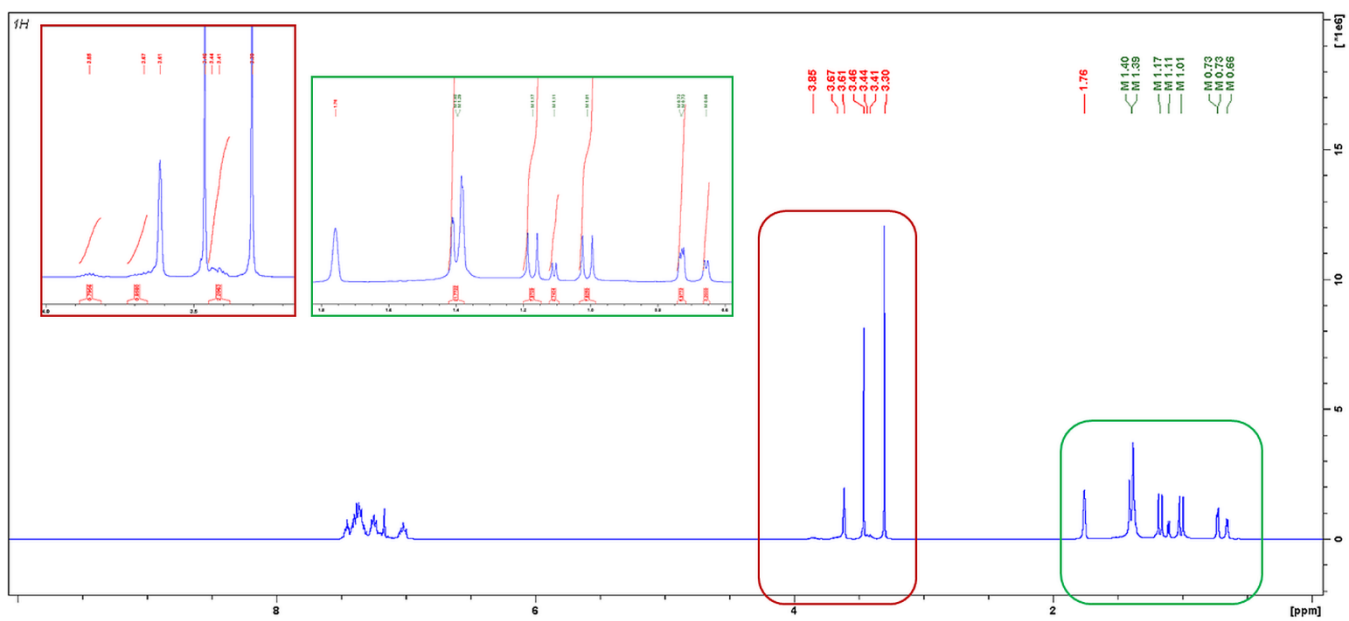

**Figure S15.** <sup>1</sup>H NMR spectrum of isolated crystals of **1a\*** dissolved in THF-d<sub>8</sub>.

**Table S5.** Description of signals observed on the  $^1\text{H}$  NMR spectrum of isolated crystals of **1a\***- Figure S15.

|                                                                                                                                                                                                                                                                                                                                                                                                                                                                                                                                                                                                                                                                                                                                                                                                                                                                                                                                                                                                                                                                                                                                                                                                                                                                                                                                                                                                                                                                                                                                                                                                                                                                                                                                                                                                                                                                                                                                                                                                                                                                                                                                                                                                                                                                                                                                                                                                                                                                                                                                                                                                                                                                                                                                                                                                                                                                |  |                                                                                                                                                                                             |
|----------------------------------------------------------------------------------------------------------------------------------------------------------------------------------------------------------------------------------------------------------------------------------------------------------------------------------------------------------------------------------------------------------------------------------------------------------------------------------------------------------------------------------------------------------------------------------------------------------------------------------------------------------------------------------------------------------------------------------------------------------------------------------------------------------------------------------------------------------------------------------------------------------------------------------------------------------------------------------------------------------------------------------------------------------------------------------------------------------------------------------------------------------------------------------------------------------------------------------------------------------------------------------------------------------------------------------------------------------------------------------------------------------------------------------------------------------------------------------------------------------------------------------------------------------------------------------------------------------------------------------------------------------------------------------------------------------------------------------------------------------------------------------------------------------------------------------------------------------------------------------------------------------------------------------------------------------------------------------------------------------------------------------------------------------------------------------------------------------------------------------------------------------------------------------------------------------------------------------------------------------------------------------------------------------------------------------------------------------------------------------------------------------------------------------------------------------------------------------------------------------------------------------------------------------------------------------------------------------------------------------------------------------------------------------------------------------------------------------------------------------------------------------------------------------------------------------------------------------------|--|---------------------------------------------------------------------------------------------------------------------------------------------------------------------------------------------|
|                                                                                                                                                                                                                                                                                                                                                                                                                                                                                                                                                                                                                                                                                                                                                                                                                                                                                                                                                                                                                                                                                                                                                                                                                                                                                                                                                                                                                                                                                                                                                                                                                                                                                                                                                                                                                                                                                                                                                                                                                                                                                                                                                                                                                                                                                                                                                                                                                                                                                                                                                                                                                                                                                                                                                                                                                                                                |  | $[\text{Li}(\text{DME})_3]^+[\{\text{P}(\text{Me})_2\text{-CH}(\text{biph})\text{-CH}(\text{biph})\text{-P}(\text{PrBu}_2)\}_2\text{Li}]^-$ <p style="text-align: center;"><b>(1a*)</b></p> |
| <ul style="list-style-type: none"> <li>➤ 7.5 ppm – 6.98 ppm – aromatic protons;</li> <li>➤ 3.85 ppm, m, 1 H, <math>[\text{Li}(\text{DME})_3]^+[\{\text{P}(\text{Me})_2\text{-CH}(\text{biph})\text{-CH}(\text{biph})\text{-P}(\text{PrBu}_2)\}_2\text{Li}]^-</math>;</li> <li>➤ 3.67 ppm, m, 1H, <math>[\text{Li}(\text{DME})_3]^+[\{\text{P}(\text{Me})_2\text{-CH}(\text{biph})\text{-CH}(\text{biph})\text{-P}(\text{PrBu}_2)\}_2\text{Li}]^-</math>;</li> <li>➤ 3.61 ppm, small amount of THF from THF-<math>d_8</math>;</li> <li>➤ 3.46 ppm, DME protons;</li> <li>➤ 3.44 ppm, m, 1H, <math>[\text{Li}(\text{DME})_3]^+[\{\text{P}(\text{Me})_2\text{-CH}(\text{biph})\text{-CH}(\text{biph})\text{-P}(\text{PrBu}_2)\}_2\text{Li}]^-</math>;</li> <li>➤ 3.41 ppm, m, 1H, <math>[\text{Li}(\text{DME})_3]^+[\{\text{P}(\text{Me})_2\text{-CH}(\text{biph})\text{-CH}(\text{biph})\text{-P}(\text{PrBu}_2)\}_2\text{Li}]^-</math>;</li> <li>➤ 3.30 ppm, DME protons;</li> <li>➤ 1.76 ppm, small amount of THF from THF-<math>d_8</math>;</li> <li>➤ 1.40 ppm, d, <math>J_{\text{PH}} = 11.2</math> Hz, 9H, <math>[\text{Li}(\text{DME})_3]^+[\{\text{P}(\text{Me})_2\text{-CH}(\text{biph})\text{-CH}(\text{biph})\text{-P}(\text{PrBu}_2)\}_2\text{Li}]^-</math>;</li> <li>➤ 1.39 ppm, d, <math>J_{\text{PH}} = 11.0</math> Hz, 9H, <math>[\text{Li}(\text{DME})_3]^+[\{\text{P}(\text{Me})_2\text{-CH}(\text{biph})\text{-CH}(\text{biph})\text{-P}(\text{PrBu}_2)\}_2\text{Li}]^-</math>;</li> <li>➤ 1.17 ppm, d, <math>J_{\text{PH}} = 11.2</math> Hz, 9H, <math>[\text{Li}(\text{DME})_3]^+[\{\text{P}(\text{Me})_2\text{-CH}(\text{biph})\text{-CH}(\text{biph})\text{-P}(\text{PrBu}_2)\}_2\text{Li}]^-</math>;</li> <li>➤ 1.11 ppm, d, <math>J_{\text{PH}} = 4.5</math> Hz, 3H, <math>[\text{Li}(\text{DME})_3]^+[\{\text{P}(\text{Me})_2\text{-CH}(\text{biph})\text{-CH}(\text{biph})\text{-P}(\text{PrBu}_2)\}_2\text{Li}]^-</math>;</li> <li>➤ ppm, d, <math>J_{\text{PH}} = 11.6</math> Hz, 9H, <math>[\text{Li}(\text{DME})_3]^+[\{\text{P}(\text{Me})_2\text{-CH}(\text{biph})\text{-CH}(\text{biph})\text{-P}(\text{PrBu}_2)\}_2\text{Li}]^-</math>;</li> <li>➤ 0.73 ppm, d, <math>J_{\text{PH}} = 3.9</math> Hz, 3H, <math>[\text{Li}(\text{DME})_3]^+[\{\text{P}(\text{Me})_2\text{-CH}(\text{biph})\text{-CH}(\text{biph})\text{-P}(\text{PrBu}_2)\}_2\text{Li}]^-</math>;</li> <li>➤ 0.73 ppm, d, <math>J_{\text{PH}} = 4.3</math> Hz, 3H, <math>[\text{Li}(\text{DME})_3]^+[\{\text{P}(\text{Me})_2\text{-CH}(\text{biph})\text{-CH}(\text{biph})\text{-P}(\text{PrBu}_2)\}_2\text{Li}]^-</math>;</li> <li>➤ 0.66 ppm, d, <math>J_{\text{PH}} = 4.0</math> Hz, 3H, <math>[\text{Li}(\text{DME})_3]^+[\{\text{P}(\text{Me})_2\text{-CH}(\text{biph})\text{-CH}(\text{biph})\text{-P}(\text{PrBu}_2)\}_2\text{Li}]^-</math>;</li> </ul> |  |                                                                                                                                                                                             |

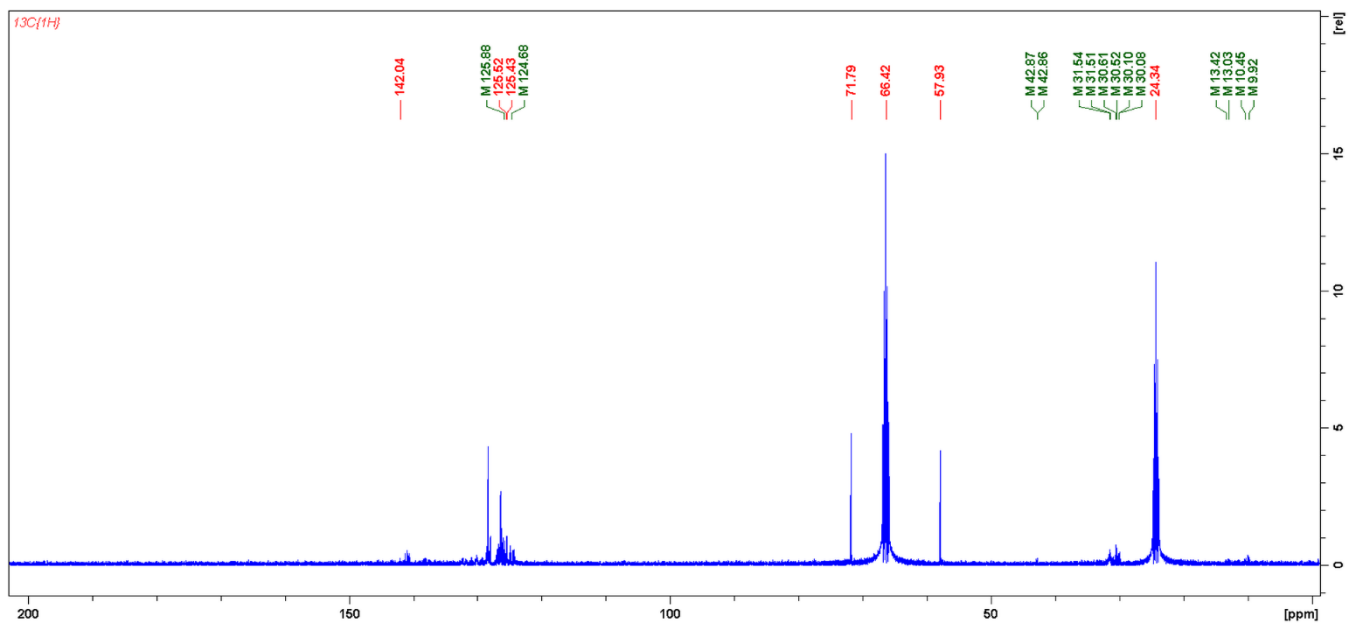

**Figure S16.**  $^{13}\text{C}\{^1\text{H}\}$  NMR spectrum of isolated crystals of **1a\*** dissolved in THF- $d_8$ .



**Table S6.** Description of signals observed on the  $^{13}\text{C}\{^1\text{H}\}$  NMR spectrum of isolated crystals of **1a\***- **Figure S16**.

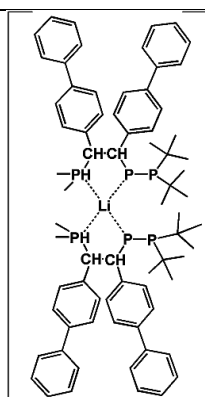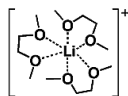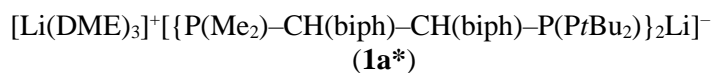

- 142.04 ppm – 125.43 ppm – aromatic C-atoms;
- 71.79 ppm, DME;
- 66.42 ppm, THF-d<sub>8</sub>;
- 57.93 ppm, DME;
- 52.79 ppm, d,  $J_{\text{PC}} = 19.4$  Hz,  $[\text{Li}(\text{DME})_3]^+[\{\text{P}(\text{Me})_2\text{-CH}(\text{biph})\text{-CH}(\text{biph})\text{-P}(\text{tBu})_2\}_2\text{Li}]^-$ ;
- 52.72 ppm, d,  $J_{\text{PC}} = 17.8$  Hz,  $[\text{Li}(\text{DME})_3]^+[\{\text{P}(\text{Me})_2\text{-CH}(\text{biph})\text{-CH}(\text{biph})\text{-P}(\text{tBu})_2\}_2\text{Li}]^-$ ;
- 44.67 ppm, d,  $J_{\text{PC}} = 16.2$  Hz,  $[\text{Li}(\text{DME})_3]^+[\{\text{P}(\text{Me})_2\text{-CH}(\text{biph})\text{-CH}(\text{biph})\text{-P}(\text{tBu})_2\}_2\text{Li}]^-$ ;
- 42.87 ppm, d,  $J_{\text{PC}} = 18.7$  Hz,  $[\text{Li}(\text{DME})_3]^+[\{\text{P}(\text{Me})_2\text{-CH}(\text{biph})\text{-CH}(\text{biph})\text{-P}(\text{tBu})_2\}_2\text{Li}]^-$ ;
- 31.54 ppm, dd,  $J_{\text{PC}} = 28.8$  Hz,  $J_{\text{PC}} = 1.7$  Hz,  $[\text{Li}(\text{DME})_3]^+[\{\text{P}(\text{Me})_2\text{-CH}(\text{biph})\text{-CH}(\text{biph})\text{-P}(\text{P}\{\text{C}(\text{CH}_3)_3\}_2)\}_2\text{Li}]^-$ ;
- 31.51 ppm, dd,  $J_{\text{PC}} = 28.7$  Hz,  $J_{\text{PC}} = 3.7$  Hz,  $[\text{Li}(\text{DME})_3]^+[\{\text{P}(\text{Me})_2\text{-CH}(\text{biph})\text{-CH}(\text{biph})\text{-P}(\text{P}\{\text{C}(\text{CH}_3)_3\}_2)\}_2\text{Li}]^-$ ;
- 30.61 ppm, dd,  $J_{\text{PC}} = 15.0$  Hz,  $J_{\text{PC}} = 1.6$  Hz,  $[\text{Li}(\text{DME})_3]^+[\{\text{P}(\text{Me})_2\text{-CH}(\text{biph})\text{-CH}(\text{biph})\text{-P}(\text{P}\{\text{C}(\text{CH}_3)_3\}_2)\}_2\text{Li}]^-$ ;
- 30.52 ppm, dd,  $J_{\text{PC}} = 14.0$  Hz,  $J_{\text{PC}} = 0.8$  Hz,  $[\text{Li}(\text{DME})_3]^+[\{\text{P}(\text{Me})_2\text{-CH}(\text{biph})\text{-CH}(\text{biph})\text{-P}(\text{P}\{\text{C}(\text{CH}_3)_3\}_2)\}_2\text{Li}]^-$ ;
- 30.10 ppm, dd,  $J_{\text{PC}} = 13.1$  Hz,  $J_{\text{PC}} = 8.6$  Hz,  $[\text{Li}(\text{DME})_3]^+[\{\text{P}(\text{Me})_2\text{-CH}(\text{biph})\text{-CH}(\text{biph})\text{-P}(\text{P}\{\text{C}(\text{CH}_3)_3\}_2)\}_2\text{Li}]^-$ ;
- 30.08 ppm, dd,  $J_{\text{PC}} = 14.3$  Hz,  $J_{\text{PC}} = 1.2$  Hz,  $[\text{Li}(\text{DME})_3]^+[\{\text{P}(\text{Me})_2\text{-CH}(\text{biph})\text{-CH}(\text{biph})\text{-P}(\text{P}\{\text{C}(\text{CH}_3)_3\}_2)\}_2\text{Li}]^-$ ;
- 24.34 ppm, THF-d<sub>8</sub>;
- 13.42 ppm, d,  $J_{\text{PC}} = 17.5$  Hz,  $[\text{Li}(\text{DME})_3]^+[\{\text{P}(\text{Me})_2\text{-CH}(\text{biph})\text{-CH}(\text{biph})\text{-P}(\text{tBu})_2\}_2\text{Li}]^-$ ;
- 13.03 ppm, d,  $J_{\text{PC}} = 15.5$  Hz,  $[\text{Li}(\text{DME})_3]^+[\{\text{P}(\text{Me})_2\text{-CH}(\text{biph})\text{-CH}(\text{biph})\text{-P}(\text{tBu})_2\}_2\text{Li}]^-$ ;
- 10.45 ppm, d,  $J_{\text{PC}} = 18.7$  Hz,  $[\text{Li}(\text{DME})_3]^+[\{\text{P}(\text{Me})_2\text{-CH}(\text{biph})\text{-CH}(\text{biph})\text{-P}(\text{tBu})_2\}_2\text{Li}]^-$ ;
- 9.92 ppm, d,  $J_{\text{PC}} = 19.5$  Hz,  $[\text{Li}(\text{DME})_3]^+[\{\text{P}(\text{Me})_2\text{-CH}(\text{biph})\text{-CH}(\text{biph})\text{-P}(\text{tBu})_2\}_2\text{Li}]^-$ ;

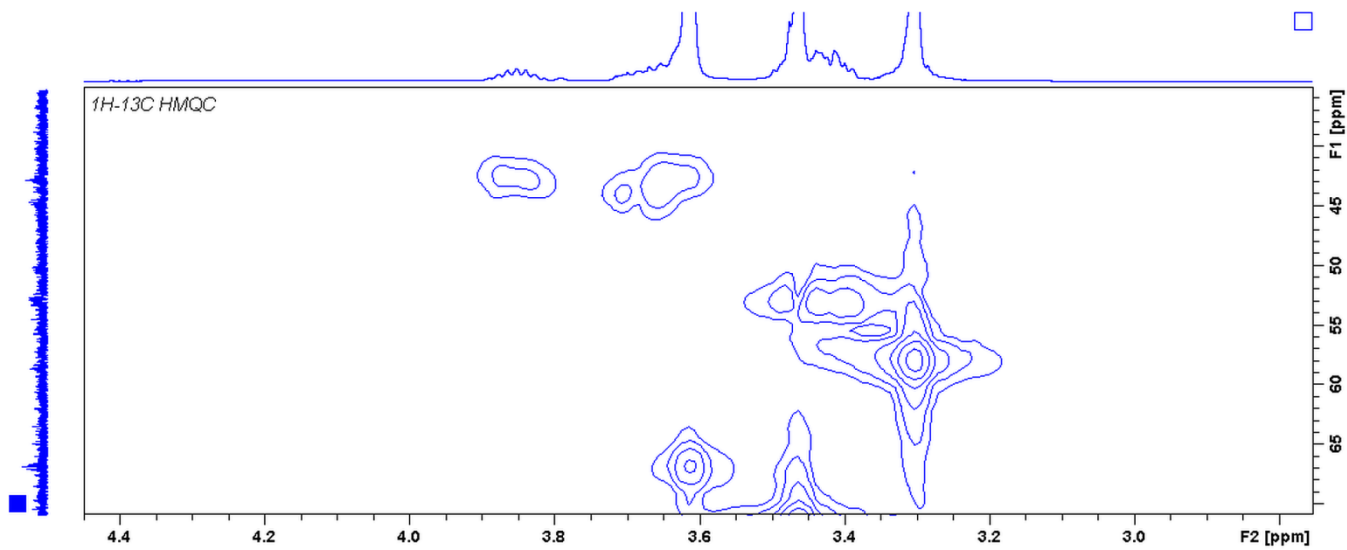

**Figure S17.**  $^{13}\text{C}\{^1\text{H}\}$ -dept  $90^\circ/1\text{H}$  HMQC NMR spectrum of isolated crystals of **1a\*** dissolved in  $\text{THF-d}_8$  presenting the correlation of methine protons with carbon atoms.

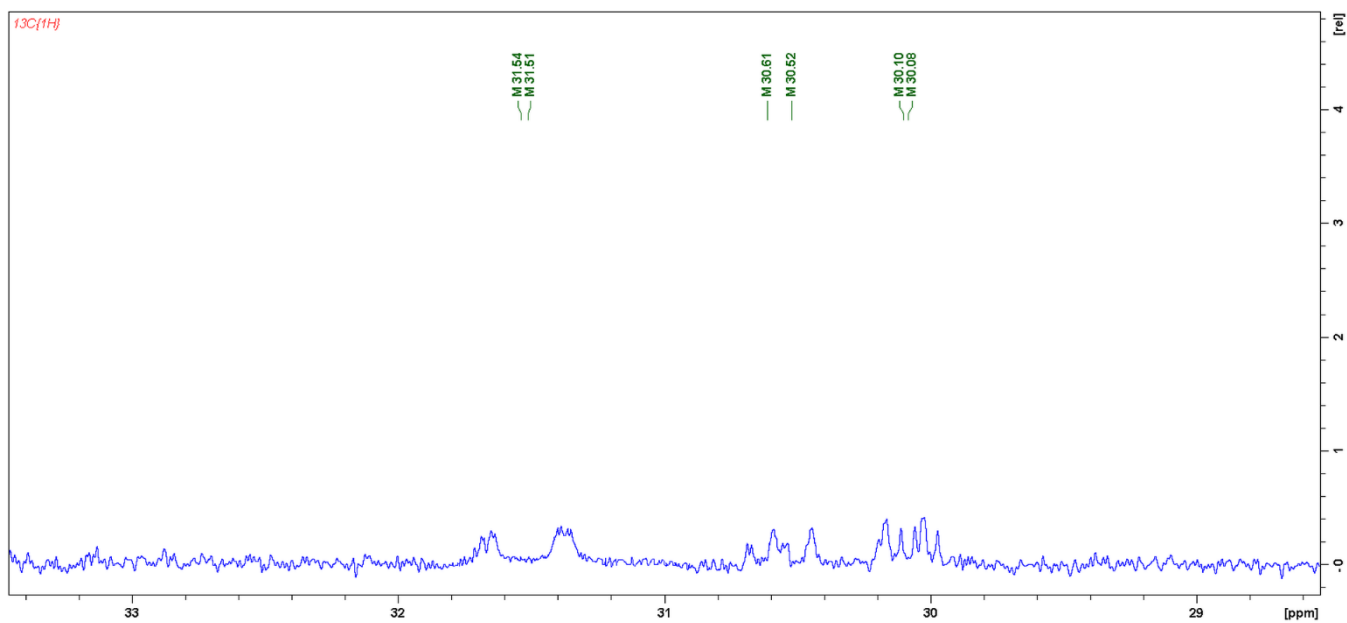

**Figure S18.**  $^{13}\text{C}\{^1\text{H}\}$  NMR spectrum of isolated crystals of **1a\*** dissolved in  $\text{THF-d}_8$  in the range of 33 ppm to 29 ppm.

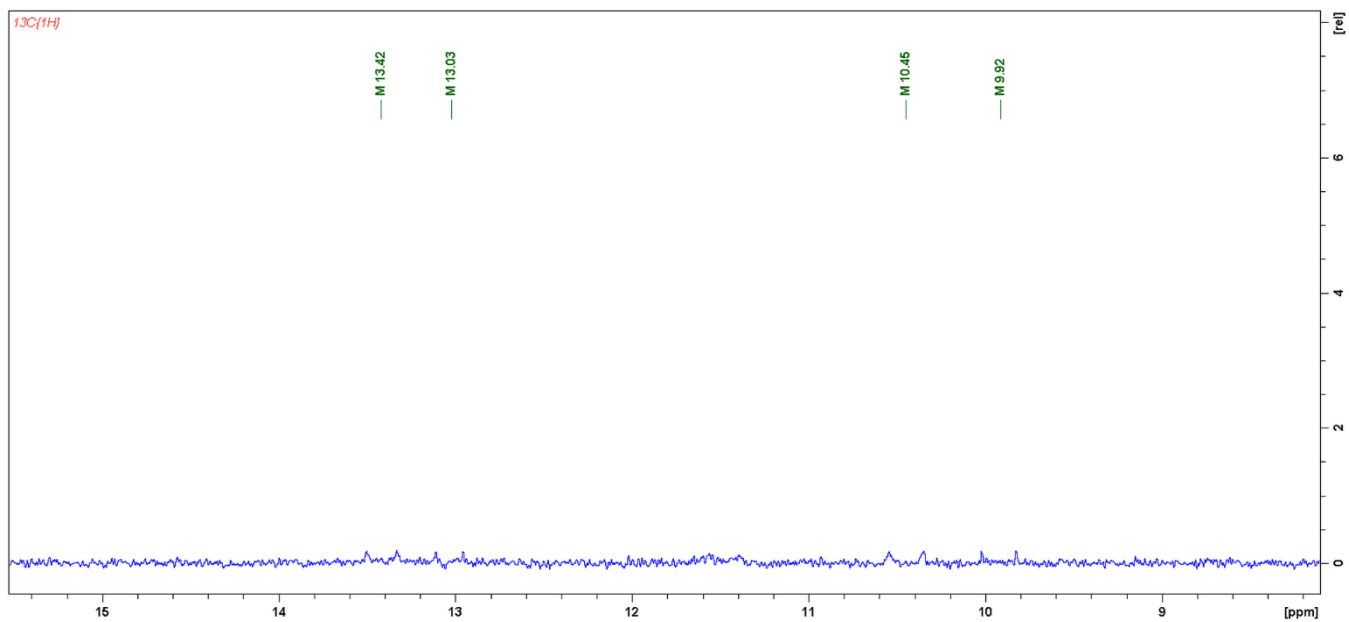

**Figure S19.** <sup>13</sup>C{<sup>1</sup>H} NMR spectrum of isolated crystals of **1a\*** dissolved in THF-d<sub>8</sub> in the range of 15 ppm to 8 ppm.

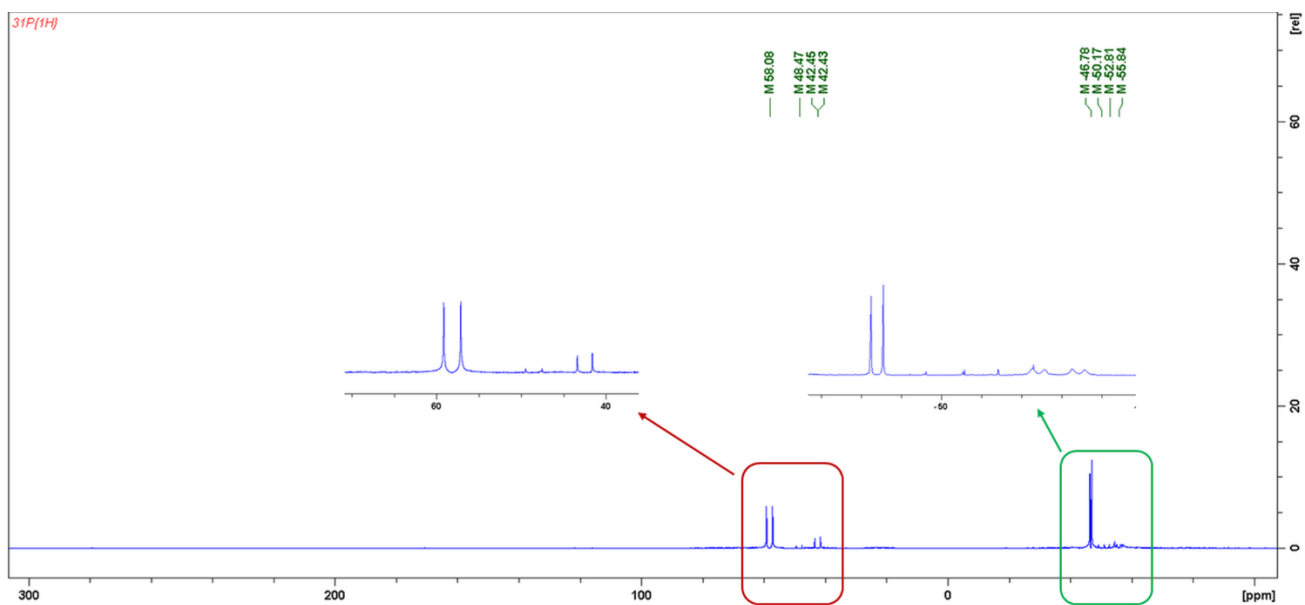

**Figure S20.** <sup>31</sup>P{<sup>1</sup>H} NMR spectrum of reaction mixture of (biph)(H)C=P-PtBu<sub>2</sub> (**1**) with MeLi in THF-d<sub>8</sub> with a lower concentration of reagents.

**Table S7.** Description of signals observed on the  $^{31}\text{P}\{^1\text{H}\}$  NMR spectrum - **Figure S20.**

|                                                                                                                                                                                                                                                                                                                                                                                                                                                                                                                                                                                                                                   |                                                                                                                   |
|-----------------------------------------------------------------------------------------------------------------------------------------------------------------------------------------------------------------------------------------------------------------------------------------------------------------------------------------------------------------------------------------------------------------------------------------------------------------------------------------------------------------------------------------------------------------------------------------------------------------------------------|-------------------------------------------------------------------------------------------------------------------|
|                                                                                                                                                                                                                                                                                                                                                                                                                                                                                                                                                                                                                                   | $[\text{P}(\text{Me})_2\text{-CH}(\text{biph})\text{-CH}(\text{biph})\text{-P}(\text{PtBu}_2)]^-$ ( <b>1a''</b> ) |
| <ul style="list-style-type: none"> <li>➤ 58.08 ppm, d, <math>J_{\text{PP}} = 325.2</math> Hz, <math>[\text{P}(\text{Me})_2\text{-CH}(\text{biph})\text{-CH}(\text{biph})\text{-P}(\text{PtBu}_2)]^-</math>;</li> <li>➤ -46.78 ppm, d, <math>J_{\text{PP}} = 108.4</math> Hz, <math>[\text{P}(\text{Me})_2\text{-CH}(\text{biph})\text{-CH}(\text{biph})\text{-P}(\text{PtBu}_2)]^-</math>;</li> <li>➤ -55.84 ppm, broad dd, <math>J_{\text{PP}} = 325.2</math> Hz, <math>J_{\text{PP}} = 108.4</math> Hz <math>[\text{P}(\text{Me})_2\text{-CH}(\text{biph})\text{-CH}(\text{biph})\text{-P}(\text{PtBu}_2)]^-</math>;</li> </ul> |                                                                                                                   |
|                                                                                                                                                                                                                                                                                                                                                                                                                                                                                                                                                                                                                                   | $[(\text{biph})(\text{H})\text{C-P}(\text{Me})\text{-PtBu}_2]^-$ ( <b>1a</b> )                                    |
| <ul style="list-style-type: none"> <li>➤ 48.47 ppm, d, <math>J_{\text{PP}} = 313.2</math> Hz, <math>[(\text{biph})(\text{H})\text{C-P}(\text{Me})\text{-PtBu}_2]^-</math>;</li> <li>➤ -50.17 ppm, d, <math>J_{\text{PP}} = 313.2</math> Hz, <math>[(\text{biph})(\text{H})\text{C-P}(\text{Me})\text{-PtBu}_2]^-</math>;</li> </ul>                                                                                                                                                                                                                                                                                               |                                                                                                                   |
|                                                                                                                                                                                                                                                                                                                                                                                                                                                                                                                                                                                                                                   | $[t\text{Bu}_2\text{P-P}\{-\text{C}(\text{H})(\text{biph})\}\text{-PtBu}_2]^-$ ( <b>2_1</b> )                     |
| <ul style="list-style-type: none"> <li>➤ -52.81 ppm, dd, <math>J_{\text{PP}} = 285.4</math> Hz, <math>J_{\text{PP}} = 284.8</math> Hz, <math>[t\text{Bu}_2\text{P-P}\{-\text{C}(\text{H})(\text{biph})\}\text{-PtBu}_2]^-</math>;</li> <li>➤ 42.43 ppm, d, <math>J_{\text{PP}} = 285.4</math> Hz, <math>[t\text{Bu}_2\text{P-P}\{-\text{C}(\text{H})(\text{biph})\}\text{-PtBu}_2]^-</math>;</li> <li>➤ 42.45 ppm, d, <math>J_{\text{PP}} = 284.8</math> Hz, <math>[t\text{Bu}_2\text{P-P}\{-\text{C}(\text{H})(\text{biph})\}\text{-PtBu}_2]^-</math>;</li> </ul>                                                                |                                                                                                                   |

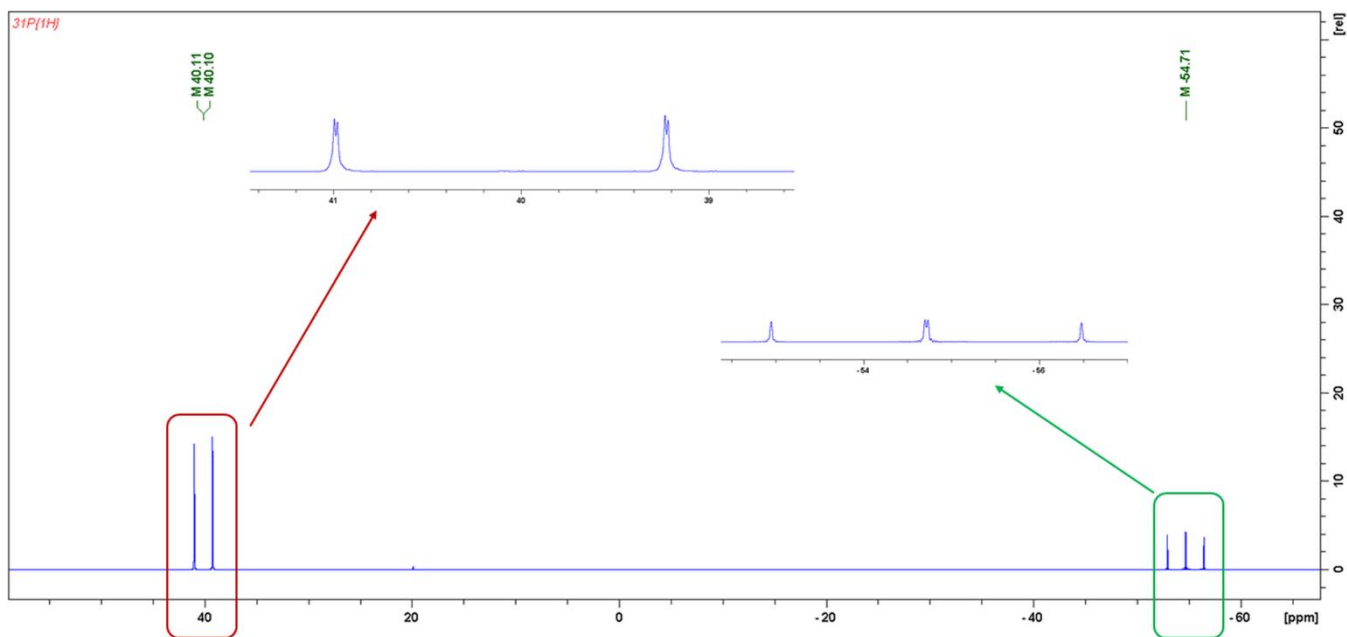

**Figure S21.**  $^{31}\text{P}\{^1\text{H}\}$  NMR spectrum of isolated crystals of  $[\text{Li}(\text{DME})_3]^+[\text{tBu}_2\text{P}-\text{P}-\{\text{C}(\text{H})(\text{biph})\}-\text{PtBu}_2]^-$  (**2\_1**) dissolved in  $\text{THF-d}_8$ .

**Table S8.** Description of signals observed on the  $^{31}\text{P}\{^1\text{H}\}$  NMR spectrum - **Figure S21**.

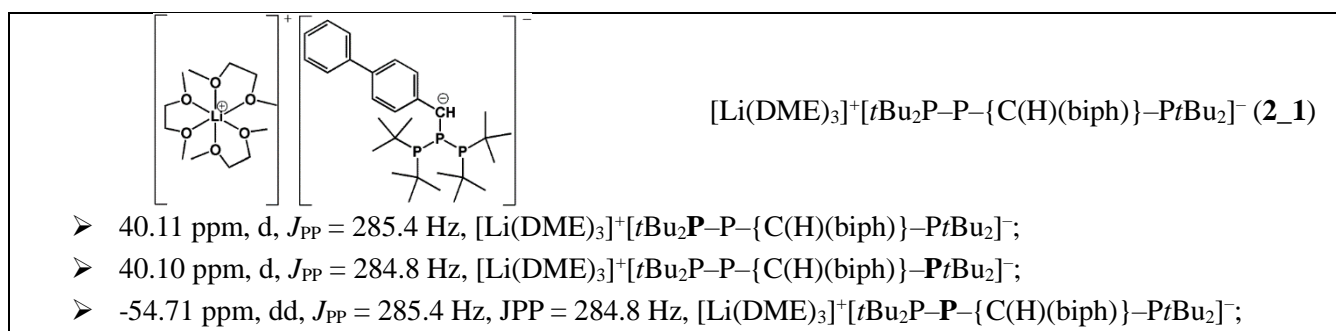

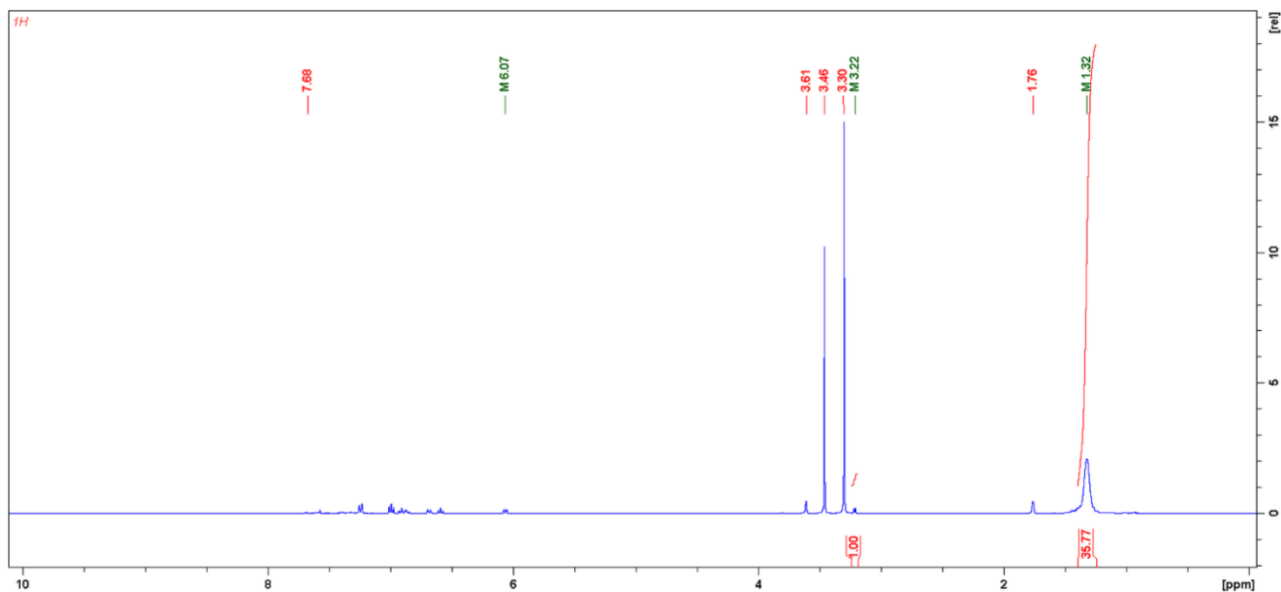

**Figure S22.**  $^1\text{H}$  NMR spectrum of isolated crystals of  $[\text{Li}(\text{DME})_3]^+[\text{tBu}_2\text{P}-\text{P}-\{\text{C}(\text{H})(\text{biph})\}-\text{PtBu}_2]^-$  (**2\_1**) dissolved in  $\text{THF-d}_8$ .

**Table S9.** Description of signals observed on the  $^1\text{H}$  NMR spectrum - **Figure S22**.

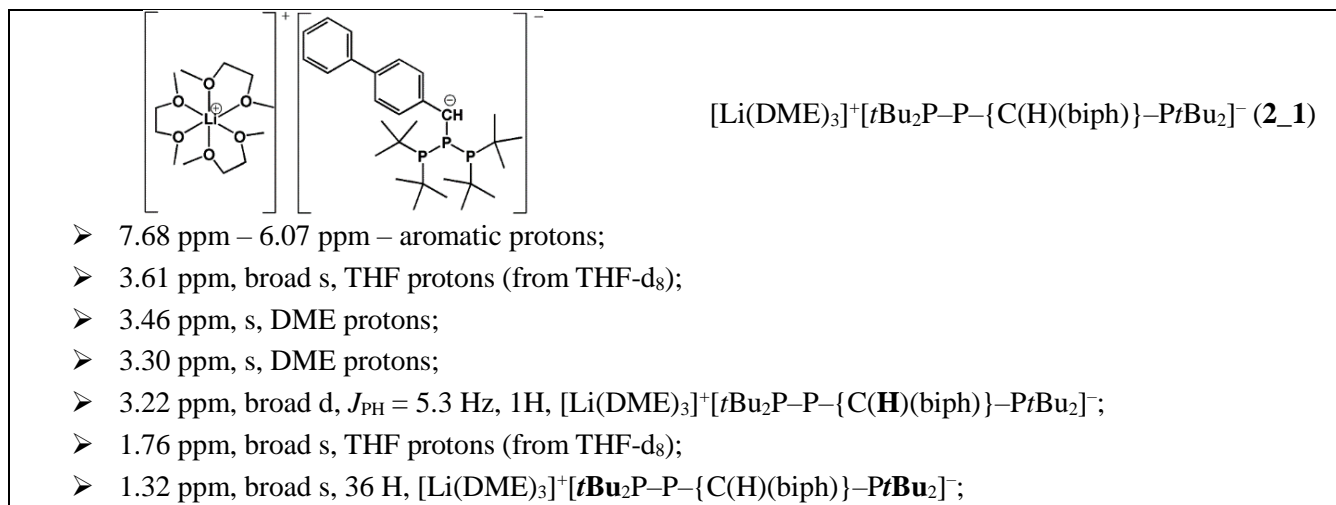

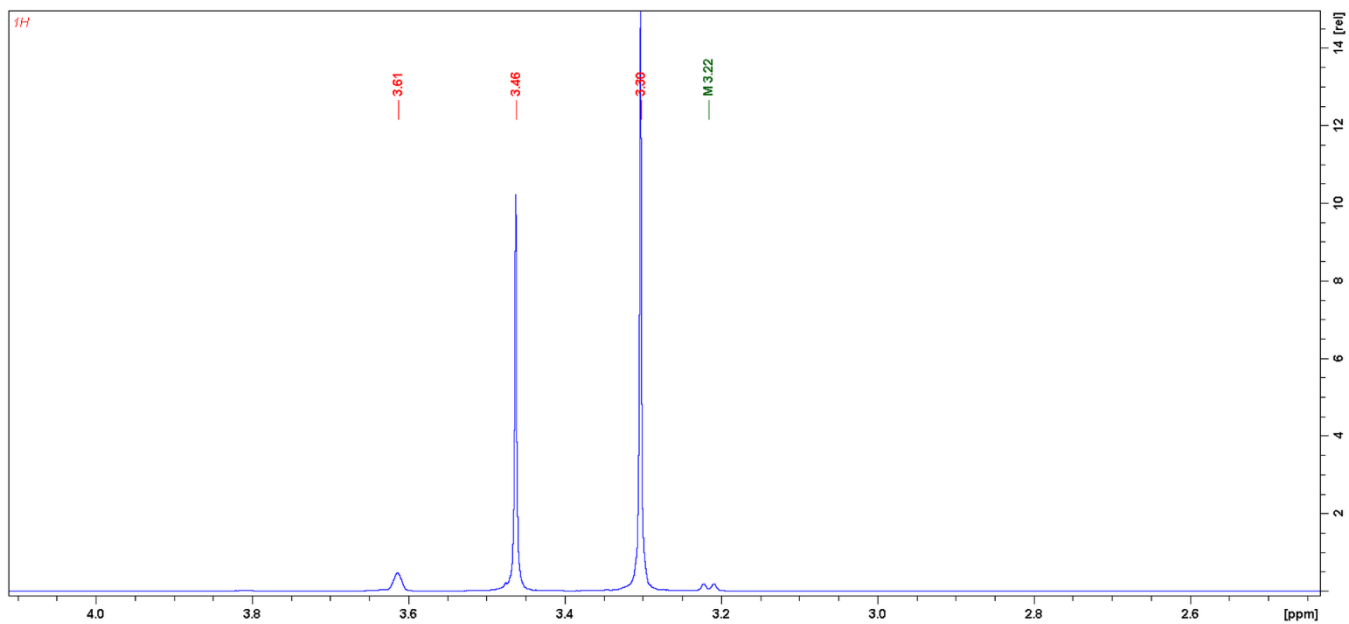

**Figure S23.** <sup>1</sup>H NMR spectrum of isolated crystals of [Li(DME)<sub>3</sub>]<sup>+</sup>[tBu<sub>2</sub>P-P-{C(H)(biph)}-PtBu<sub>2</sub>]<sup>-</sup> (**2\_1**) dissolved in THF-d<sub>8</sub> in the range from 4.0 ppm to 2.5 ppm.

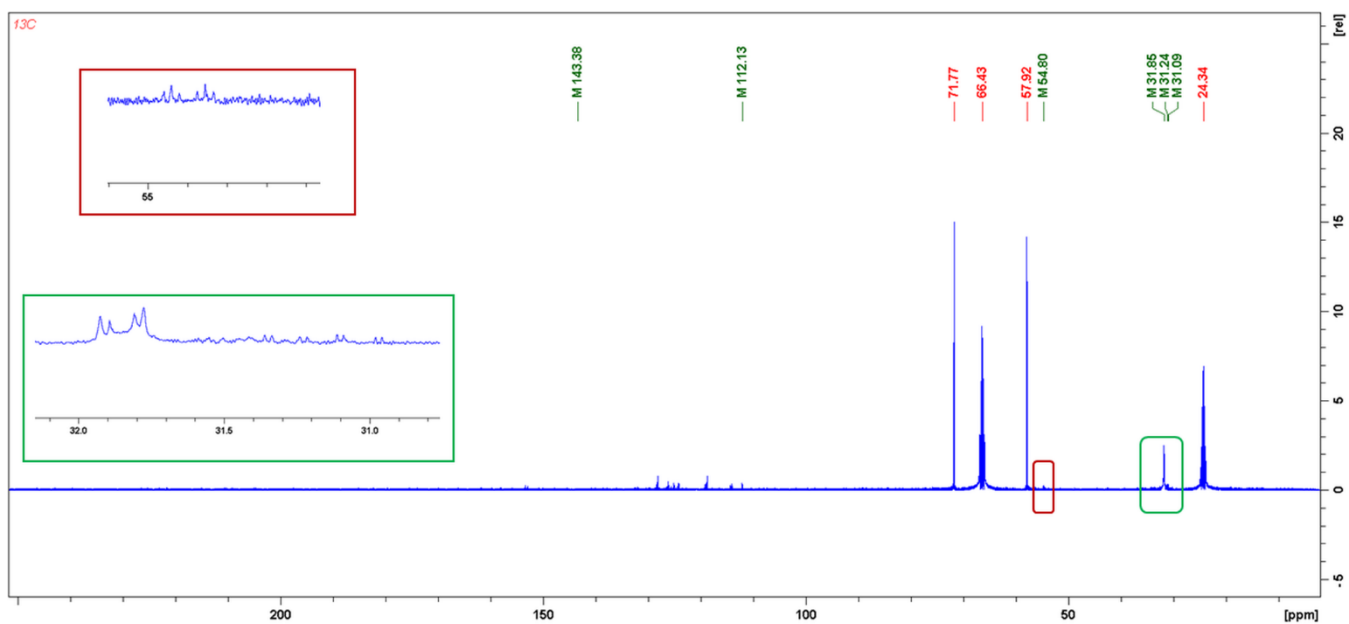

**Figure S24.** <sup>13</sup>C{<sup>1</sup>H} NMR spectrum of isolated crystals of [Li(DME)<sub>3</sub>]<sup>+</sup>[tBu<sub>2</sub>P-P-{C(H)(biph)}-PtBu<sub>2</sub>]<sup>-</sup> (**2\_1**) dissolved in THF-d<sub>8</sub>.

**Table S10.** Description of signals observed on the  $^{13}\text{C}\{^1\text{H}\}$  NMR spectrum - **Figure S24.**

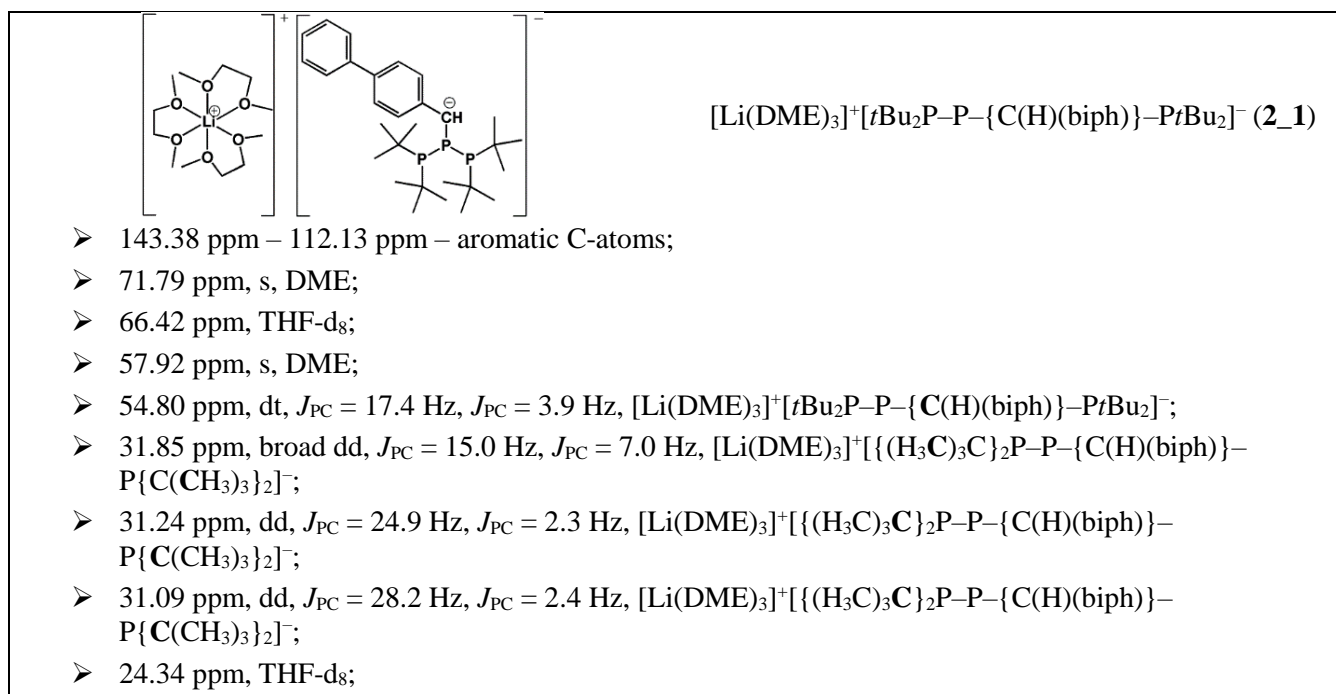



**b) with *n*BuLi**

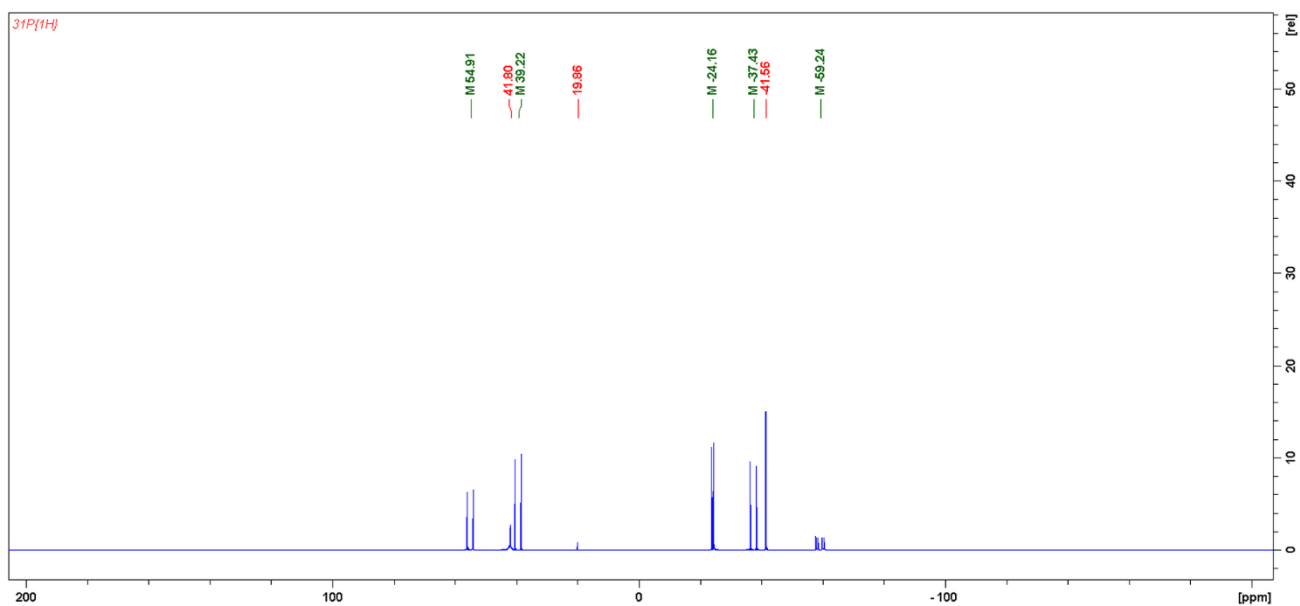

**Figure S25.** <sup>31</sup>P{<sup>1</sup>H} NMR spectrum of reaction mixture of (biph)(H)C=P-PtBu<sub>2</sub> (**1**) with *n*BuLi in THF-d<sub>8</sub>.

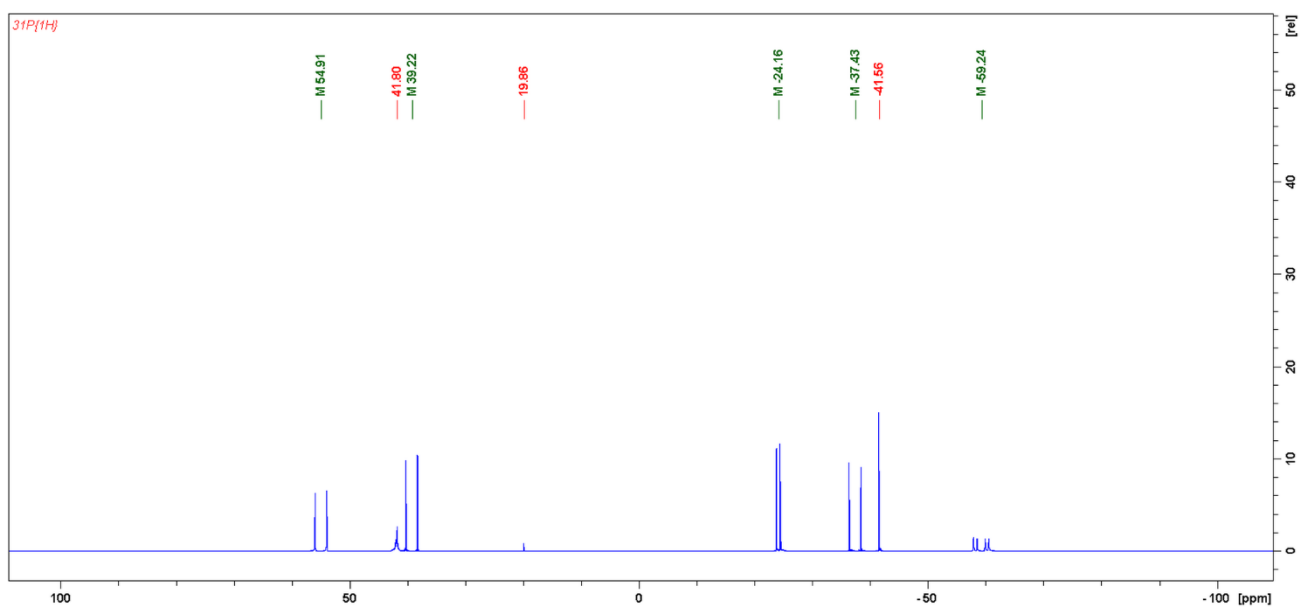

**Figure S26.** <sup>31</sup>P{<sup>1</sup>H} NMR spectrum of reaction mixture of (biph)(H)C=P-PtBu<sub>2</sub> (**1**) with *n*BuLi in THF-d<sub>8</sub> in narrow range (from 100 ppm to -100 ppm).

**Table S11.** Description of signals observed on the  $^{31}\text{P}\{^1\text{H}\}$  NMR spectrum of reaction mixture of  $(\text{biph})(\text{H})\text{C}=\text{P}-\text{P}t\text{Bu}_2$  with  $n\text{BuLi}$  in  $\text{THF-d}_8$  – **Figure S25 and S26.**

|                                                                                                                                                               |                                                                                                                                                                                                                                                                                                                                                                                                                                                                                                                                                                                                                                                                                                                                                                                                                           |
|---------------------------------------------------------------------------------------------------------------------------------------------------------------|---------------------------------------------------------------------------------------------------------------------------------------------------------------------------------------------------------------------------------------------------------------------------------------------------------------------------------------------------------------------------------------------------------------------------------------------------------------------------------------------------------------------------------------------------------------------------------------------------------------------------------------------------------------------------------------------------------------------------------------------------------------------------------------------------------------------------|
| 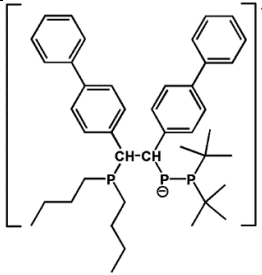                                                                             | <p style="text-align: right;"><math>[\text{P}(n\text{Bu})_2\text{-CH}(\text{biph})\text{-CH}(\text{biph})\text{-P}(\text{P}t\text{Bu}_2)]^-</math> (<b>1b''</b>)</p> <ul style="list-style-type: none"> <li>➤ 54.91 ppm, d, <math>J_{\text{PP}} = 326.0</math> Hz, <math>[\text{P}(n\text{Bu})_2\text{-CH}(\text{biph})\text{-CH}(\text{biph})\text{-P}(\text{P}t\text{Bu}_2)]^-</math>;</li> <li>➤ -24.16 ppm, d, <math>J_{\text{PP}} = 102.4</math> Hz, <math>[\text{P}(n\text{Bu})_2\text{-CH}(\text{biph})\text{-CH}(\text{biph})\text{-P}(\text{P}t\text{Bu}_2)]^-</math>;</li> <li>➤ -59.24 ppm, dd, <math>J_{\text{PP}} = 102.4</math> Hz, <math>J_{\text{PP}} = 326.0</math> Hz, <math>[\text{P}(n\text{Bu})_2\text{-CH}(\text{biph})\text{-CH}(\text{biph})\text{-P}(\text{P}t\text{Bu}_2)]^-</math>;</li> </ul> |
|                                                                              | <p style="text-align: right;"><math>[(\text{biph})(\text{H})\text{C-P}(n\text{Bu})\text{-P}t\text{Bu}_2]^-</math> (<b>1b</b>)</p> <ul style="list-style-type: none"> <li>➤ 39.22 ppm, d, <math>J_{\text{PP}} = 326.3</math> Hz, <math>[(\text{biph})(\text{H})\text{C-P}(n\text{Bu})\text{-P}t\text{Bu}_2]^-</math>;</li> <li>➤ -37.43 ppm, d, <math>J_{\text{PP}} = 326.3</math> Hz, <math>[(\text{biph})(\text{H})\text{C-P}(n\text{Bu})\text{-P}t\text{Bu}_2]^-</math>;</li> </ul>                                                                                                                                                                                                                                                                                                                                     |
| <p><math>t\text{Bu}_2\text{PLi}</math></p> <ul style="list-style-type: none"> <li>➤ 41.80 ppm, broad singlet, <math>t\text{Bu}_2\text{PLi}</math>;</li> </ul> |                                                                                                                                                                                                                                                                                                                                                                                                                                                                                                                                                                                                                                                                                                                                                                                                                           |
|                                                                             | <p style="text-align: right;"><math>[(\text{biph})(\text{H})\text{C-P}(n\text{Bu})_2]^-</math> (<b>1b'</b>)</p> <ul style="list-style-type: none"> <li>➤ -41.56 ppm, s, <math>[(\text{biph})(\text{H})\text{C-P}(n\text{Bu})_2]^-</math>;</li> </ul>                                                                                                                                                                                                                                                                                                                                                                                                                                                                                                                                                                      |

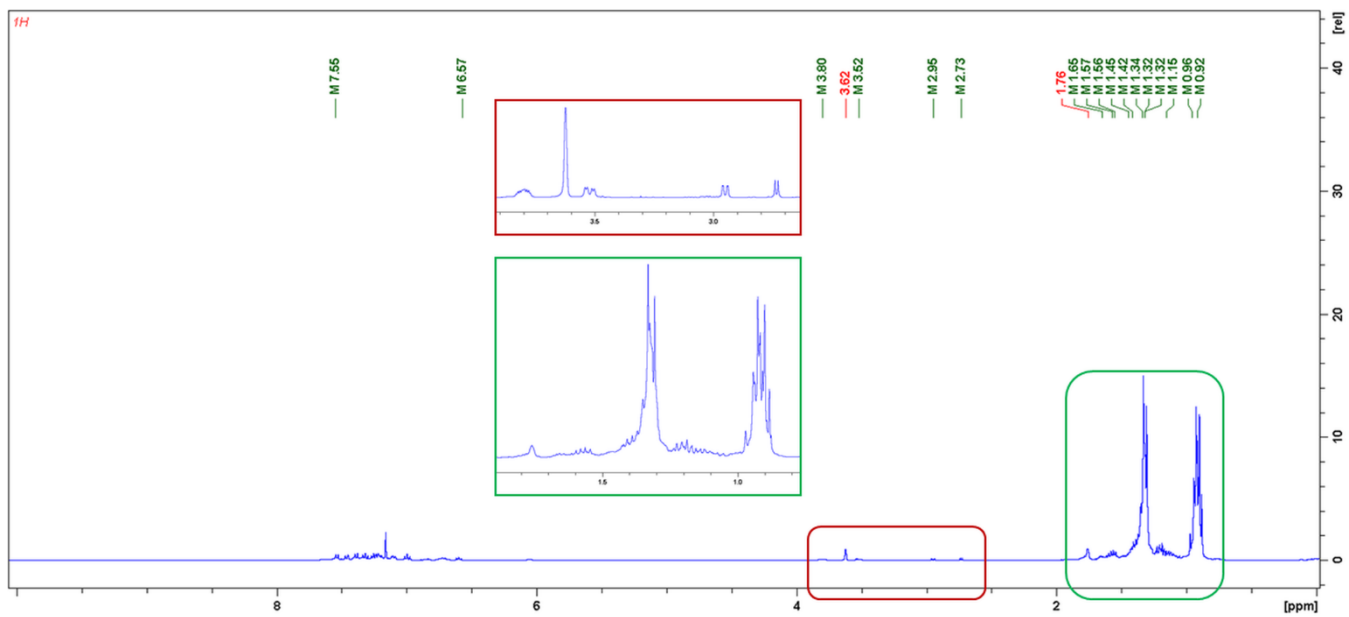

**Figure S27.** <sup>1</sup>H NMR spectrum of reaction mixture of (biph)(H)C=P-*t*Bu<sub>2</sub> (**1**) with *n*BuLi in THF-*d*<sub>8</sub>.

**Table S12.** Description of signals observed on the  $^1\text{H}$  NMR spectrum reaction mixture of  $(\text{biph})(\text{H})\text{C}=\text{P}-\text{P}t\text{Bu}_2$  (**1**) with  $n\text{BuLi}$  in  $\text{THF-d}_8$  – **Figure S27**.

|                                                                                                                                                                                                                                                                                                                                                                                                                                                                                                                                                                                                                                                                                                                                                                                                                                                                                                                                                                                                                                                                                                                                                                                                                                                                                                                                                                                                                                  |                                                                                                                           |
|----------------------------------------------------------------------------------------------------------------------------------------------------------------------------------------------------------------------------------------------------------------------------------------------------------------------------------------------------------------------------------------------------------------------------------------------------------------------------------------------------------------------------------------------------------------------------------------------------------------------------------------------------------------------------------------------------------------------------------------------------------------------------------------------------------------------------------------------------------------------------------------------------------------------------------------------------------------------------------------------------------------------------------------------------------------------------------------------------------------------------------------------------------------------------------------------------------------------------------------------------------------------------------------------------------------------------------------------------------------------------------------------------------------------------------|---------------------------------------------------------------------------------------------------------------------------|
|                                                                                                                                                                                                                                                                                                                                                                                                                                                                                                                                                                                                                                                                                                                                                                                                                                                                                                                                                                                                                                                                                                                                                                                                                                                                                                                                                                                                                                  | $[\text{P}(n\text{Bu})_2\text{-CH}(\text{biph})\text{-CH}(\text{biph})\text{-P}(\text{P}t\text{Bu}_2)]^-$ ( <b>1b''</b> ) |
| <ul style="list-style-type: none"> <li>➤ 3.80 ppm, broad m, 1H, <math>[\text{P}(n\text{Bu})_2\text{-CH}(\text{biph})\text{-CH}(\text{biph})\text{-P}(\text{P}t\text{Bu}_2)]^-</math>;</li> <li>➤ 3.52 ppm, dd, <math>J_{\text{PH}} = 11.5</math> Hz, <math>J_{\text{PH}} = 3.7</math> Hz, 1H, <math>[\text{P}(n\text{Bu})_2\text{-CH}(\text{biph})\text{-CH}(\text{biph})\text{-P}(\text{P}t\text{Bu}_2)]^-</math>;</li> <li>➤ 1.65 ppm, broad m, <math>[\text{P}(n\text{Bu})_2\text{-CH}(\text{biph})\text{-CH}(\text{biph})\text{-P}(\text{P}t\text{Bu}_2)]^-</math>;</li> <li>➤ 1.57 ppm, broad m, <math>[\text{P}(n\text{Bu})_2\text{-CH}(\text{biph})\text{-CH}(\text{biph})\text{-P}(\text{P}t\text{Bu}_2)]^-</math>;</li> <li>➤ 1.45 ppm, broad m, <math>[\text{P}(n\text{Bu})_2\text{-CH}(\text{biph})\text{-CH}(\text{biph})\text{-P}(\text{P}t\text{Bu}_2)]^-</math>;</li> <li>➤ 1.34 ppm, d, <math>J_{\text{PH}} = 12.2</math> Hz, 18H, <math>[\text{P}(n\text{Bu})_2\text{-CH}(\text{biph})\text{-CH}(\text{biph})\text{-P}(\text{P}t\text{Bu}_2)]^-</math>;</li> <li>➤ 1.15 ppm, broad m, <math>[\text{P}(n\text{Bu})_2\text{-CH}(\text{biph})\text{-CH}(\text{biph})\text{-P}(\text{P}t\text{Bu}_2)]^-</math>;</li> <li>➤ 0.96 ppm, d, <math>J_{\text{PH}} = 11.6</math> Hz, 18H, <math>[\text{P}(n\text{Bu})_2\text{-CH}(\text{biph})\text{-CH}(\text{biph})\text{-P}(\text{P}t\text{Bu}_2)]^-</math>;</li> </ul> |                                                                                                                           |
|                                                                                                                                                                                                                                                                                                                                                                                                                                                                                                                                                                                                                                                                                                                                                                                                                                                                                                                                                                                                                                                                                                                                                                                                                                                                                                                                                                                                                                  | $[(\text{biph})(\text{H})\text{C-P}(n\text{Bu})\text{-P}t\text{Bu}_2]^-$ ( <b>1b</b> )                                    |
| <ul style="list-style-type: none"> <li>➤ 2.95 ppm, dd, <math>J_{\text{PH}} = 7.8</math> Hz, <math>J_{\text{PH}} = 1.5</math> Hz, 1H, <math>[(\text{biph})(\text{H})\text{C-P}(n\text{Bu})\text{-P}t\text{Bu}_2]^-</math>;</li> <li>➤ 1.56 ppm, broad m, <math>[(\text{biph})(\text{H})\text{C-P}(n\text{Bu})\text{-P}t\text{Bu}_2]^-</math>;</li> <li>➤ 1.32 ppm, d, <math>J_{\text{PH}} = 12.2</math> Hz, 18H, <math>[(\text{biph})(\text{H})\text{C-P}(n\text{Bu})\text{-P}t\text{Bu}_2]^-</math>;</li> </ul>                                                                                                                                                                                                                                                                                                                                                                                                                                                                                                                                                                                                                                                                                                                                                                                                                                                                                                                  |                                                                                                                           |
| $t\text{Bu}_2\text{PLi}$                                                                                                                                                                                                                                                                                                                                                                                                                                                                                                                                                                                                                                                                                                                                                                                                                                                                                                                                                                                                                                                                                                                                                                                                                                                                                                                                                                                                         |                                                                                                                           |
| <ul style="list-style-type: none"> <li>➤ 1.32 ppm, d, <math>J_{\text{PH}} = 10.9</math> Hz, 18H, <math>t\text{Bu}_2\text{PLi}</math>;</li> </ul>                                                                                                                                                                                                                                                                                                                                                                                                                                                                                                                                                                                                                                                                                                                                                                                                                                                                                                                                                                                                                                                                                                                                                                                                                                                                                 |                                                                                                                           |
|                                                                                                                                                                                                                                                                                                                                                                                                                                                                                                                                                                                                                                                                                                                                                                                                                                                                                                                                                                                                                                                                                                                                                                                                                                                                                                                                                                                                                                  | $[(\text{biph})(\text{H})\text{C-P}(n\text{Bu})_2]^-$ ( <b>1b'</b> )                                                      |
| <ul style="list-style-type: none"> <li>➤ 2.73 ppm, d, <math>J_{\text{PH}} = 5.3</math> Hz, <math>[(\text{biph})(\text{H})\text{C-P}(n\text{Bu})_2]^-</math>;</li> <li>➤ 1.48 ppm, broad m, <math>[(\text{biph})(\text{H})\text{C-P}(n\text{Bu})_2]^-</math>;</li> <li>➤ 1.42 ppm, broad m, <math>[(\text{biph})(\text{H})\text{C-P}(n\text{Bu})_2]^-</math>;</li> </ul>                                                                                                                                                                                                                                                                                                                                                                                                                                                                                                                                                                                                                                                                                                                                                                                                                                                                                                                                                                                                                                                          |                                                                                                                           |
| <b>Another signals</b>                                                                                                                                                                                                                                                                                                                                                                                                                                                                                                                                                                                                                                                                                                                                                                                                                                                                                                                                                                                                                                                                                                                                                                                                                                                                                                                                                                                                           |                                                                                                                           |
| <ul style="list-style-type: none"> <li>➤ 7.55 ppm - 6.57 ppm – aromatic protons;</li> <li>➤ 3.62 ppm, THF-<math>\text{d}_8</math>;</li> <li>➤ 1.76 ppm, THF-<math>\text{d}_8</math>;</li> <li>➤ 1.32 ppm, DME protons;</li> <li>➤ 0.92 ppm, DME protons;</li> </ul>                                                                                                                                                                                                                                                                                                                                                                                                                                                                                                                                                                                                                                                                                                                                                                                                                                                                                                                                                                                                                                                                                                                                                              |                                                                                                                           |

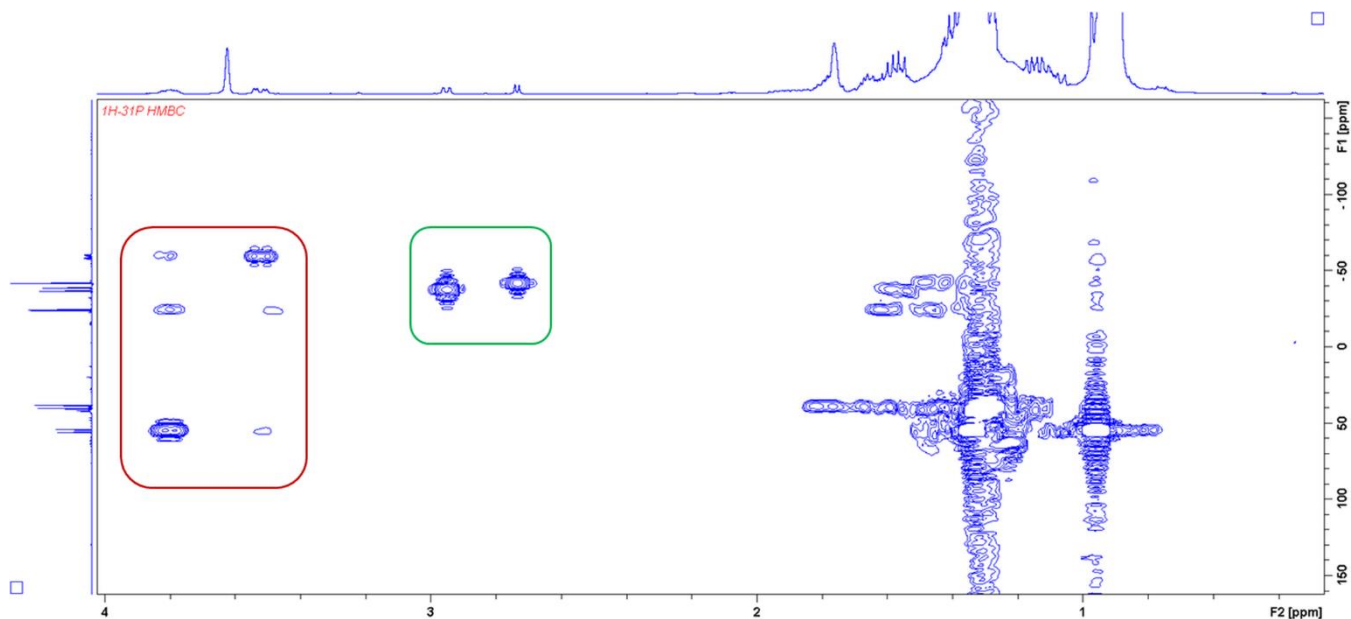

**Figure S28.**  $^{31}\text{P}\{^1\text{H}\}/^1\text{H}$  HMQC NMR spectrum presenting the correlation of methine protons with phosphorus atoms in the anion  $[\text{P}(n\text{Bu}_2)\text{-CH}(\text{biph})\text{-CH}(\text{biph})\text{-P}(n\text{Bu}_2)]^-$  (**1b''**) (red color box), correlation of methine protons with phosphorus atoms in the anions  $[(\text{biph})(\text{H})\text{C-P}(n\text{Bu})\text{-P}(n\text{Bu}_2)]^-$  (**1b**) and  $[(\text{biph})(\text{H})\text{C-P}(n\text{Bu})_2]^-$  (**1b'**) (green box).

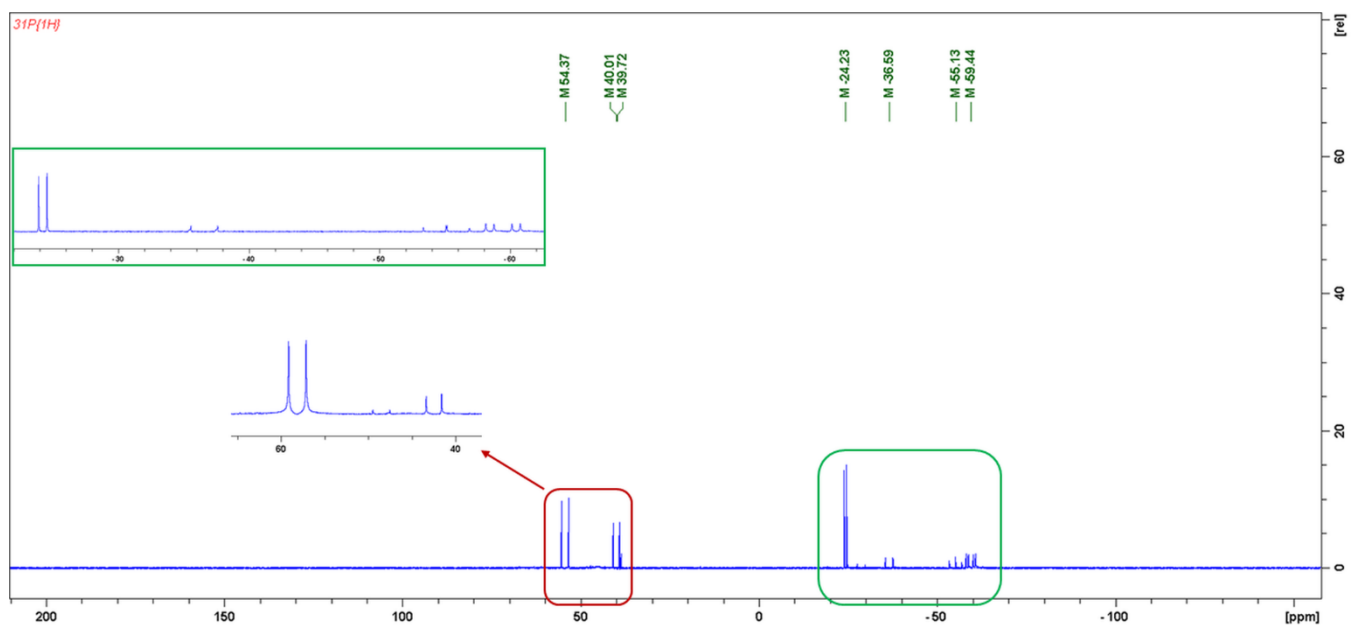

**Figure S29.**  $^{31}\text{P}\{^1\text{H}\}$  NMR spectrum of reaction mixture of  $(\text{biph})(\text{H})\text{C}=\text{P-P}(n\text{Bu})_2$  (**1**) with  $n\text{BuLi}$  in  $\text{THF-d}_8$  with a lower concentration of reagents.

**Table S13.** Description of signals observed on the  $^{31}\text{P}\{^1\text{H}\}$  NMR spectrum of reaction mixture of (biph)(H)C=P-P*t*Bu<sub>2</sub> (**1**) with *n*BuLi in THF-*d*<sub>8</sub> with a lower concentration of reagents – **Figure S29**.

|                                                                                    |                                                                                                                                                                                                                                                                                                                                                                                                                                                                                                                                                                                                                                                                                                                                                                                                                           |
|------------------------------------------------------------------------------------|---------------------------------------------------------------------------------------------------------------------------------------------------------------------------------------------------------------------------------------------------------------------------------------------------------------------------------------------------------------------------------------------------------------------------------------------------------------------------------------------------------------------------------------------------------------------------------------------------------------------------------------------------------------------------------------------------------------------------------------------------------------------------------------------------------------------------|
| 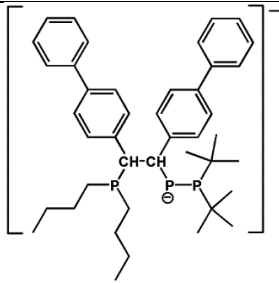  | <p style="text-align: right;"><math>[\text{P}(n\text{Bu})_2\text{-CH}(\text{biph})\text{-CH}(\text{biph})\text{-P}(\text{P}t\text{Bu}_2)]^-</math> (<b>1b''</b>)</p> <ul style="list-style-type: none"> <li>➤ 54.37 ppm, d, <math>J_{\text{PP}} = 326.0</math> Hz, <math>[\text{P}(n\text{Bu})_2\text{-CH}(\text{biph})\text{-CH}(\text{biph})\text{-P}(\text{P}t\text{Bu}_2)]^-</math>;</li> <li>➤ -24.23 ppm, d, <math>J_{\text{PP}} = 102.4</math> Hz, <math>[\text{P}(n\text{Bu})_2\text{-CH}(\text{biph})\text{-CH}(\text{biph})\text{-P}(\text{P}t\text{Bu}_2)]^-</math>;</li> <li>➤ -59.44 ppm, dd, <math>J_{\text{PP}} = 102.4</math> Hz, <math>J_{\text{PP}} = 326.0</math> Hz, <math>[\text{P}(n\text{Bu})_2\text{-CH}(\text{biph})\text{-CH}(\text{biph})\text{-P}(\text{P}t\text{Bu}_2)]^-</math>;</li> </ul> |
|   | <p style="text-align: right;"><math>[(\text{biph})(\text{H})\text{C-P}(n\text{Bu})\text{-P}t\text{Bu}_2]^-</math> (<b>1b</b>)</p> <ul style="list-style-type: none"> <li>➤ 39.72 ppm, d, <math>J_{\text{PP}} = 326.3</math> Hz, <math>[(\text{biph})(\text{H})\text{C-P}(n\text{Bu})\text{-P}t\text{Bu}_2]^-</math>;</li> <li>➤ -36.59 ppm, d, <math>J_{\text{PP}} = 326.3</math> Hz, <math>[(\text{biph})(\text{H})\text{C-P}(n\text{Bu})\text{-P}t\text{Bu}_2]^-</math>;</li> </ul>                                                                                                                                                                                                                                                                                                                                     |
|  | <p style="text-align: right;"><math>[t\text{Bu}_2\text{P-P}\{-\text{C}(\text{H})(\text{biph})\}\text{-P}t\text{Bu}_2]^-</math> (<b>2_1</b>)</p> <ul style="list-style-type: none"> <li>➤ 40.01 ppm, broad d, <math>J_{\text{PP}} = 285.1</math> Hz, <math>[t\text{Bu}_2\text{P-P}\{-\text{C}(\text{H})(\text{biph})\}\text{-P}t\text{Bu}_2]^-</math>;</li> <li>➤ -55.13 ppm, dd, <math>J_{\text{PP}} = 285.4</math> Hz, <math>J_{\text{PP}} = 284.8</math> Hz, <math>[t\text{Bu}_2\text{P-P}\{-\text{C}(\text{H})(\text{biph})\}\text{-P}t\text{Bu}_2]^-</math>;</li> </ul>                                                                                                                                                                                                                                               |

c) with *t*BuLi

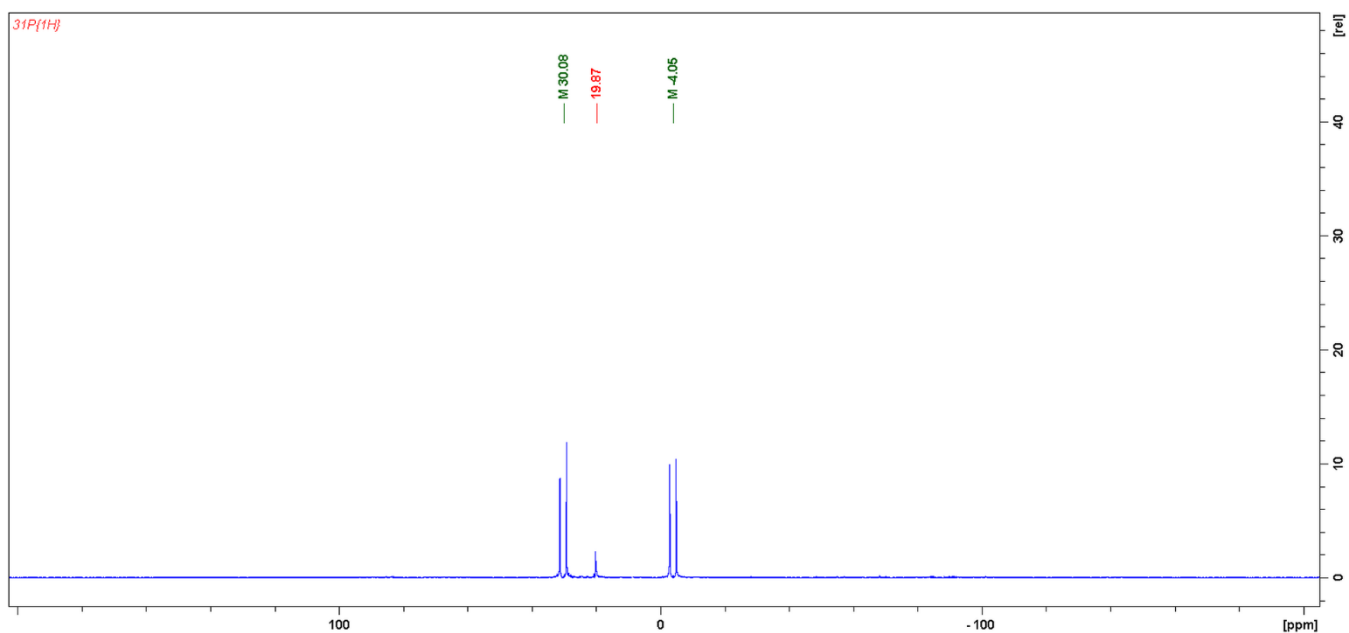

**Figure S30.**  $^{31}\text{P}\{^1\text{H}\}$  NMR spectrum of reaction mixture of (biph)(H)C=P-*Pt*Bu<sub>2</sub> (**1**) with *t*BuLi in THF-*d*<sub>8</sub>.

**Table S14.** Description of signals observed on the  $^{31}\text{P}\{^1\text{H}\}$  NMR spectrum reaction mixture of (biph)(H)C=P-*Pt*Bu<sub>2</sub> (**1**) with *t*BuLi in THF-*d*<sub>8</sub> – **Figure S30**.

|                                                                                                                                                                                                                                                                                                                                                                    |                                                                                               |
|--------------------------------------------------------------------------------------------------------------------------------------------------------------------------------------------------------------------------------------------------------------------------------------------------------------------------------------------------------------------|-----------------------------------------------------------------------------------------------|
|                                                                                                                                                                                                                                                                                                                                                                    | $[(\text{biph})(\text{H})\text{C}-\text{P}(\text{tBu})-\text{P}\text{tBu}_2]^-$ ( <b>1c</b> ) |
| <ul style="list-style-type: none"> <li>➤ 30.08 ppm, d, <math>J_{\text{PP}} = 333.28</math> Hz, <math>[(\text{biph})(\text{H})\text{C}-\text{P}(\text{tBu})-\text{P}\text{tBu}_2]^-</math>;</li> <li>➤ -4.05 ppm, d, <math>J_{\text{PP}} = 333.28</math> Hz, <math>[(\text{biph})(\text{H})\text{C}-\text{P}(\text{tBu})-\text{P}\text{tBu}_2]^-</math>;</li> </ul> |                                                                                               |
| <i>t</i> Bu <sub>2</sub> PH <ul style="list-style-type: none"> <li>➤ 19.87 ppm, s, <i>t</i>Bu<sub>2</sub>PH;</li> </ul>                                                                                                                                                                                                                                            |                                                                                               |

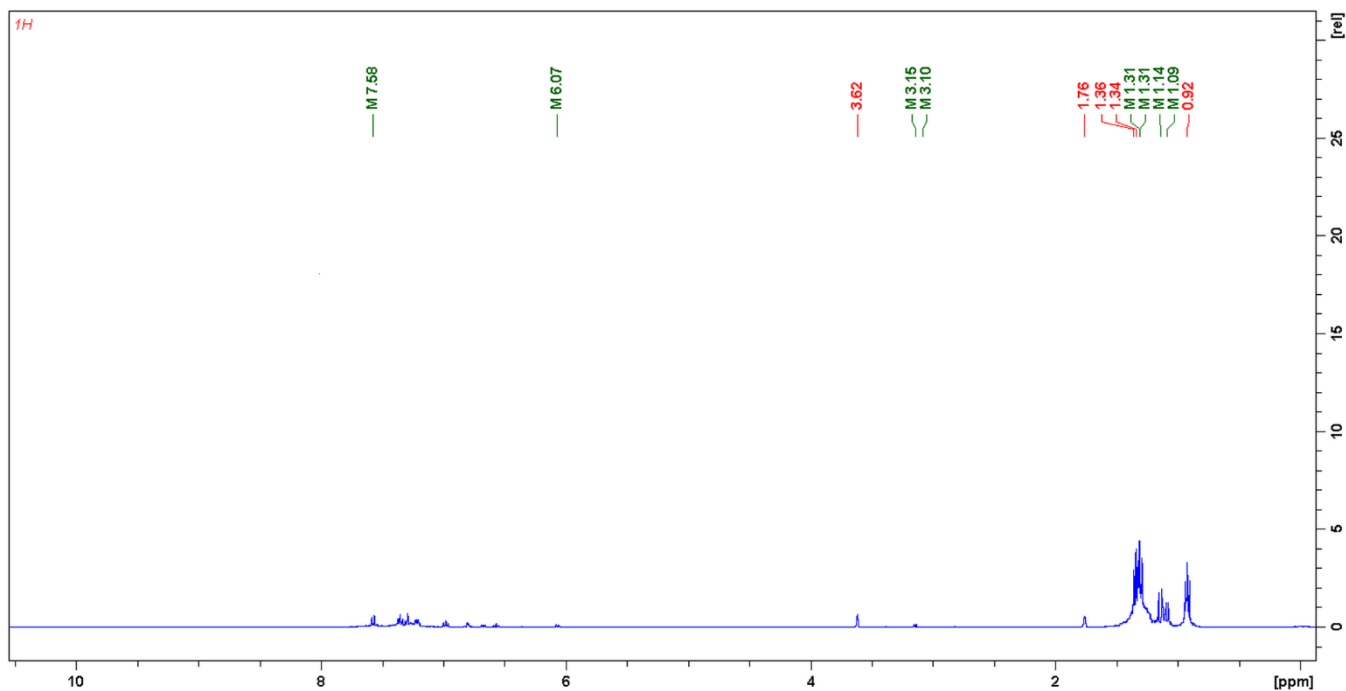

**Figure S31.**  $^1\text{H}$  NMR spectrum of reaction mixture of (biph)(H)C=P-*Pt*Bu<sub>2</sub> (**1**) with *t*BuLi in THF-*d*<sub>8</sub>.

**Table S15.** Description of signals observed on the  $^1\text{H}$  NMR spectrum reaction mixture of (biph)(H)C=P-*Pt*Bu<sub>2</sub> (**1**) with *t*BuLi in THF-*d*<sub>8</sub> – **Figure S31**.

|                                                                                                                                                                                                                                                                                                                                                                                                                                                                                                                                                                                                                                                                                                                                                |                                                                                        |
|------------------------------------------------------------------------------------------------------------------------------------------------------------------------------------------------------------------------------------------------------------------------------------------------------------------------------------------------------------------------------------------------------------------------------------------------------------------------------------------------------------------------------------------------------------------------------------------------------------------------------------------------------------------------------------------------------------------------------------------------|----------------------------------------------------------------------------------------|
|                                                                                                                                                                                                                                                                                                                                                                                                                                                                                                                                                                                                                                                                                                                                                | $[(\text{biph})(\text{H})\text{C}-\text{P}(\text{tBu})-\text{PtBu}_2]^-$ ( <b>1e</b> ) |
| <ul style="list-style-type: none"> <li>➤ 7.58 ppm – 6.07 ppm – aromatic protons;</li> <li>➤ 3.15 ppm, dd, <math>J_{\text{PH}} = 7.6</math> Hz, <math>J_{\text{PH}} = 1.3</math> Hz, 1H, <math>[(\text{biph})(\text{H})\text{C}-\text{P}(\text{tBu})-\text{PtBu}_2]^-</math>;</li> <li>➤ 1.31, ppm, d, <math>J_{\text{PH}} = 13.2</math> Hz, <math>[(\text{biph})(\text{H})\text{C}-\text{P}(\text{tBu})-\text{PtBu}_2]^-</math>;</li> <li>➤ 1.31 ppm, <math>J_{\text{PH}} = 13.7</math> Hz, <math>[(\text{biph})(\text{H})\text{C}-\text{P}(\text{tBu})-\text{PtBu}_2]^-</math>;</li> <li>➤ 1.14 ppm, d, <math>J_{\text{PH}} = 12.7</math> Hz, <math>[(\text{biph})(\text{H})\text{C}-\text{P}(\text{tBu})-\text{PtBu}_2]^-</math>;</li> </ul> |                                                                                        |
| <i>t</i> Bu <sub>2</sub> PH <ul style="list-style-type: none"> <li>➤ 3.10 ppm, d, <math>J_{\text{PH}} = 198.4</math> Hz, <i>t</i>Bu<sub>2</sub>PH;</li> <li>➤ 1.09 ppm, d, <math>J_{\text{PH}} = 12.3</math> Hz, <i>t</i>Bu<sub>2</sub>PH;</li> </ul>                                                                                                                                                                                                                                                                                                                                                                                                                                                                                          |                                                                                        |



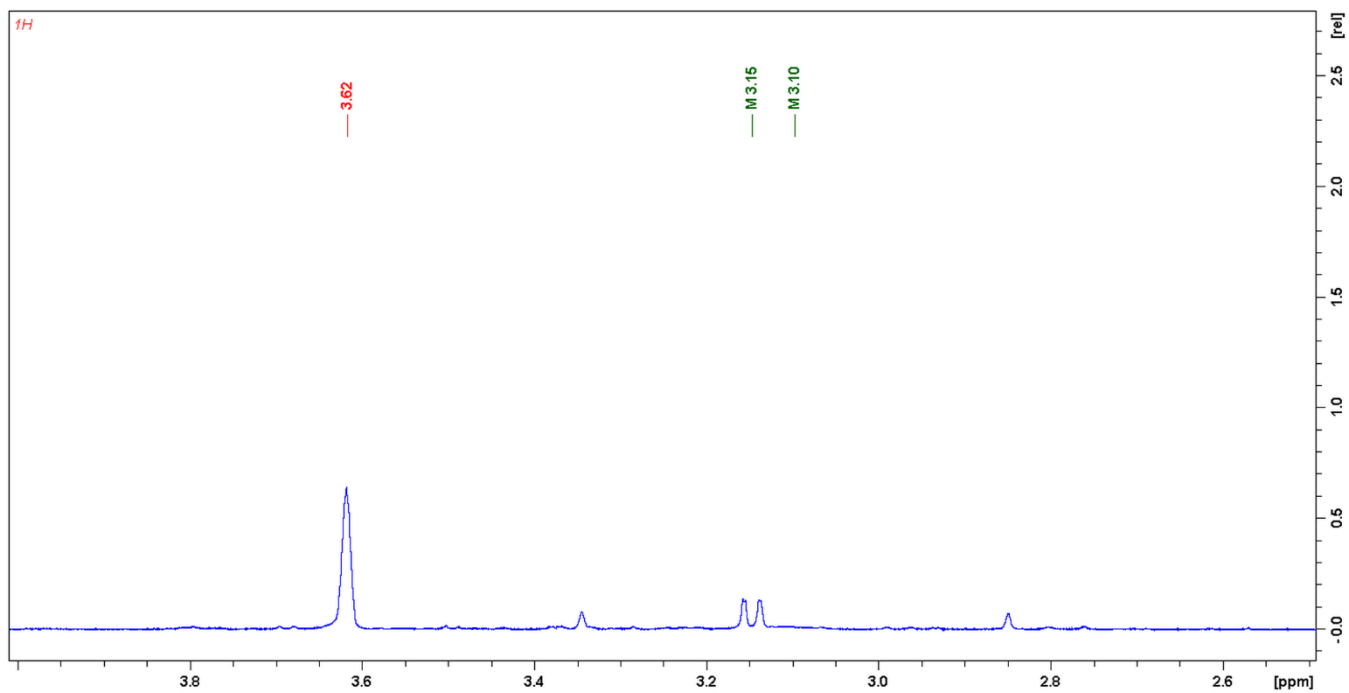

**Figure S32.** <sup>1</sup>H NMR spectrum of reaction mixture of (biph)(H)C=P-PtBu<sub>2</sub> (**1**) with *t*BuLi in THF-d<sub>8</sub> in the range from 4 ppm to 3 ppm.

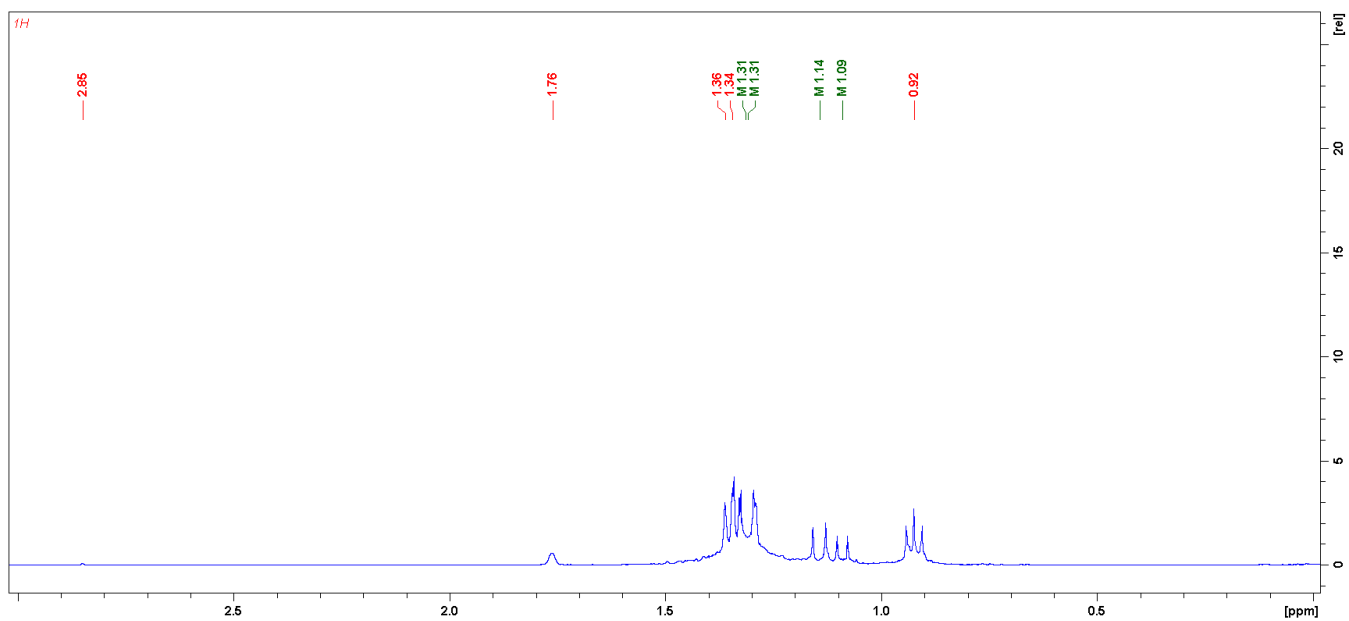

**Figure S33.** <sup>1</sup>H NMR spectrum of reaction mixture of (biph)(H)C=P-PtBu<sub>2</sub> (**1**) with *t*BuLi in THF-d<sub>8</sub> in the range from 3 ppm to 0 ppm.

2. Reaction of (3,5-*t*Bu<sub>2</sub>C<sub>6</sub>H<sub>3</sub>)(H)C=P-P*t*Bu<sub>2</sub> (**3**).

a) with MeLi

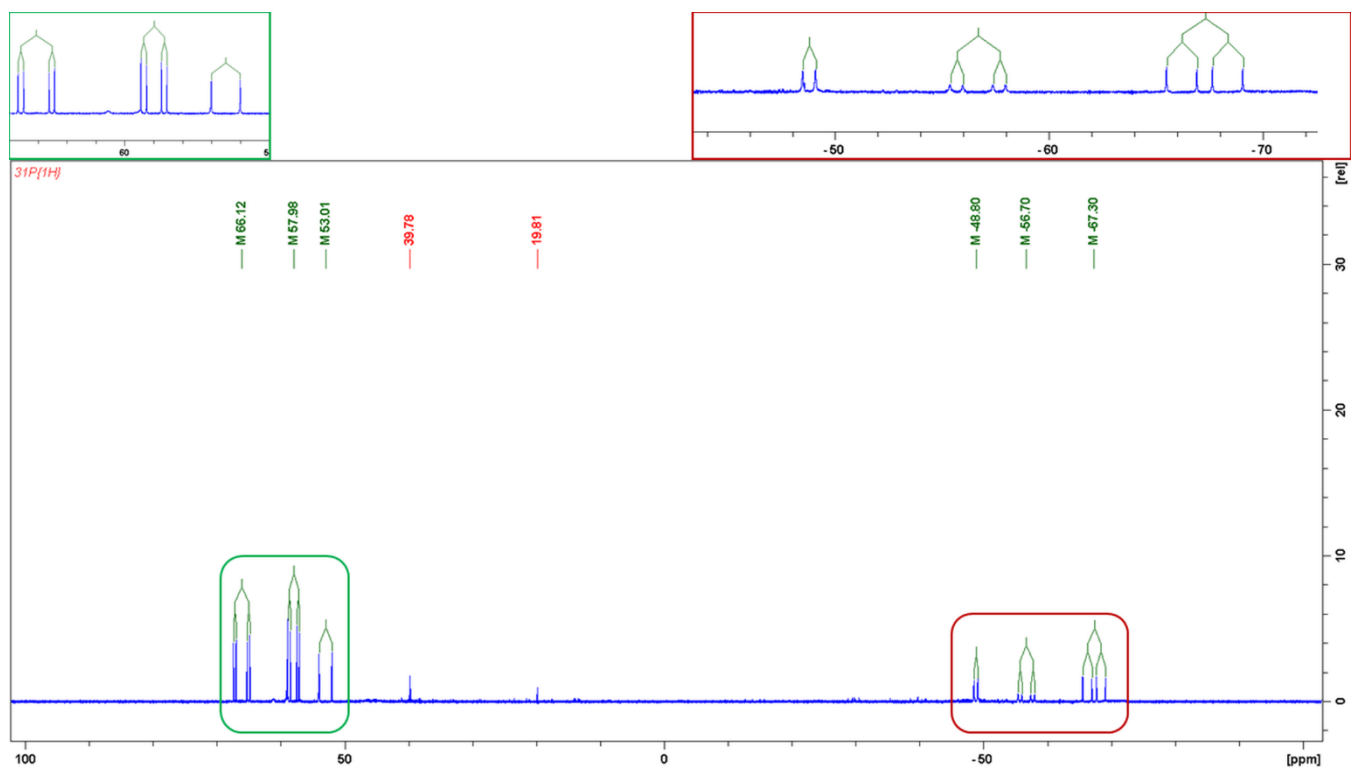

**Figure S34.** <sup>31</sup>P{<sup>1</sup>H} NMR spectrum of reaction mixture of (3,5-*t*Bu<sub>2</sub>C<sub>6</sub>H<sub>3</sub>)(H)C=P-P*t*Bu<sub>2</sub> (**3**) with MeLi in THF-d<sub>8</sub>.

**Table S16.** Description of signals observed on the  $^{31}\text{P}\{^1\text{H}\}$  NMR spectrum - **Figure S34.**

|                                                                                                                                                                                                                                                                                                                                                                                                                                                                                                                                                                                                                                                                                                                                                                                          |                                                                                                                                                                      |
|------------------------------------------------------------------------------------------------------------------------------------------------------------------------------------------------------------------------------------------------------------------------------------------------------------------------------------------------------------------------------------------------------------------------------------------------------------------------------------------------------------------------------------------------------------------------------------------------------------------------------------------------------------------------------------------------------------------------------------------------------------------------------------------|----------------------------------------------------------------------------------------------------------------------------------------------------------------------|
| <p>The structure shows a central phosphorus atom (P) bonded to two tert-butyl groups (tBu) and a negatively charged carbon atom (C<sup>-</sup>). The carbon atom is also bonded to a hydrogen atom (H) and a 3,5-di-tert-butylphenyl group. The phosphorus atom is also bonded to another phosphorus atom (P), which is in turn bonded to two tert-butyl groups (tBu) and the same 3,5-di-tert-butylphenyl group.</p>                                                                                                                                                                                                                                                                                                                                                                    | $[\text{tBu}_2\text{P}-\text{P}-\{\text{C}(\text{H})(3,5\text{-tBu}_2\text{C}_6\text{H}_3)\}-\text{PtBu}_2]^-$ ( <b>2_3</b> )                                        |
| <ul style="list-style-type: none"> <li>➤ 66.12 ppm, dd, <math>J_{\text{PP}} = 347.5</math> Hz, <math>J_{\text{PP}} = 62.5</math> Hz, <math>[\text{tBu}_2\text{P}-\text{P}-\{\text{C}(\text{H})(3,5\text{-tBu}_2\text{C}_6\text{H}_3)\}-\text{PtBu}_2]^-</math>;</li> <li>➤ 57.98 ppm, dd, <math>J_{\text{PP}} = 231.7</math> Hz, <math>J_{\text{PP}} = 62.5</math> Hz, <math>[\text{tBu}_2\text{P}-\text{P}-\{\text{C}(\text{H})(3,5\text{-tBu}_2\text{C}_6\text{H}_3)\}-\text{PtBu}_2]^-</math>;</li> <li>➤ -67.30 ppm, dd, <math>J_{\text{PP}} = 347.5</math> Hz, <math>J_{\text{PP}} = 231.7</math> Hz, <math>[[\text{tBu}_2\text{P}-\text{P}-\{\text{C}(\text{H})(3,5\text{-tBu}_2\text{C}_6\text{H}_3)\}-\text{PtBu}_2]^-]</math>;</li> </ul>                                       |                                                                                                                                                                      |
| <p>The structure shows two phosphorus atoms (P) bonded to two methyl groups (Me) and a 3,5-di-tert-butylphenyl group. The phosphorus atoms are also bonded to two carbon atoms (CH), which are in turn bonded to two 3,5-di-tert-butylphenyl groups. The phosphorus atom is also bonded to another phosphorus atom (P), which is in turn bonded to two tert-butyl groups (tBu) and the same 3,5-di-tert-butylphenyl group.</p>                                                                                                                                                                                                                                                                                                                                                           | $[\text{P}(\text{Me})_2-\text{CH}(3,5\text{-tBu}_2\text{C}_6\text{H}_3)-\text{CH}(3,5\text{-tBu}_2\text{C}_6\text{H}_3)-\text{P}-(\text{PtBu}_2)]^-$ ( <b>3a''</b> ) |
| <ul style="list-style-type: none"> <li>➤ 53.01 ppm, d, <math>J_{\text{PP}} = 324.1</math> Hz, <math>[\text{P}(\text{Me})_2-\text{CH}(3,5\text{-tBu}_2\text{C}_6\text{H}_3)-\text{CH}(3,5\text{-tBu}_2\text{C}_6\text{H}_3)-\text{P}-(\text{PtBu}_2)]^-</math>;</li> <li>➤ -48.80 ppm, d, <math>J_{\text{PP}} = 97.6</math> Hz, <math>[\text{P}(\text{Me})_2-\text{CH}(3,5\text{-tBu}_2\text{C}_6\text{H}_3)-\text{CH}(3,5\text{-tBu}_2\text{C}_6\text{H}_3)-\text{P}-(\text{PtBu}_2)]^-</math>;</li> <li>➤ -56.70 ppm, broad dd, <math>J_{\text{PP}} = 324.1</math> Hz, <math>J_{\text{PP}} = 97.6</math> Hz <math>[\text{P}(\text{Me})_2-\text{CH}(3,5\text{-tBu}_2\text{C}_6\text{H}_3)-\text{CH}(3,5\text{-tBu}_2\text{C}_6\text{H}_3)-\text{P}-(\text{PtBu}_2)]^-</math>;</li> </ul> |                                                                                                                                                                      |
| <p><i>t</i>Bu<sub>2</sub>PLi</p> <ul style="list-style-type: none"> <li>➤ 39.78 ppm, s;</li> </ul> <p><i>t</i>Bu<sub>2</sub>PH</p> <ul style="list-style-type: none"> <li>➤ 19.81 ppm, s;</li> </ul>                                                                                                                                                                                                                                                                                                                                                                                                                                                                                                                                                                                     |                                                                                                                                                                      |

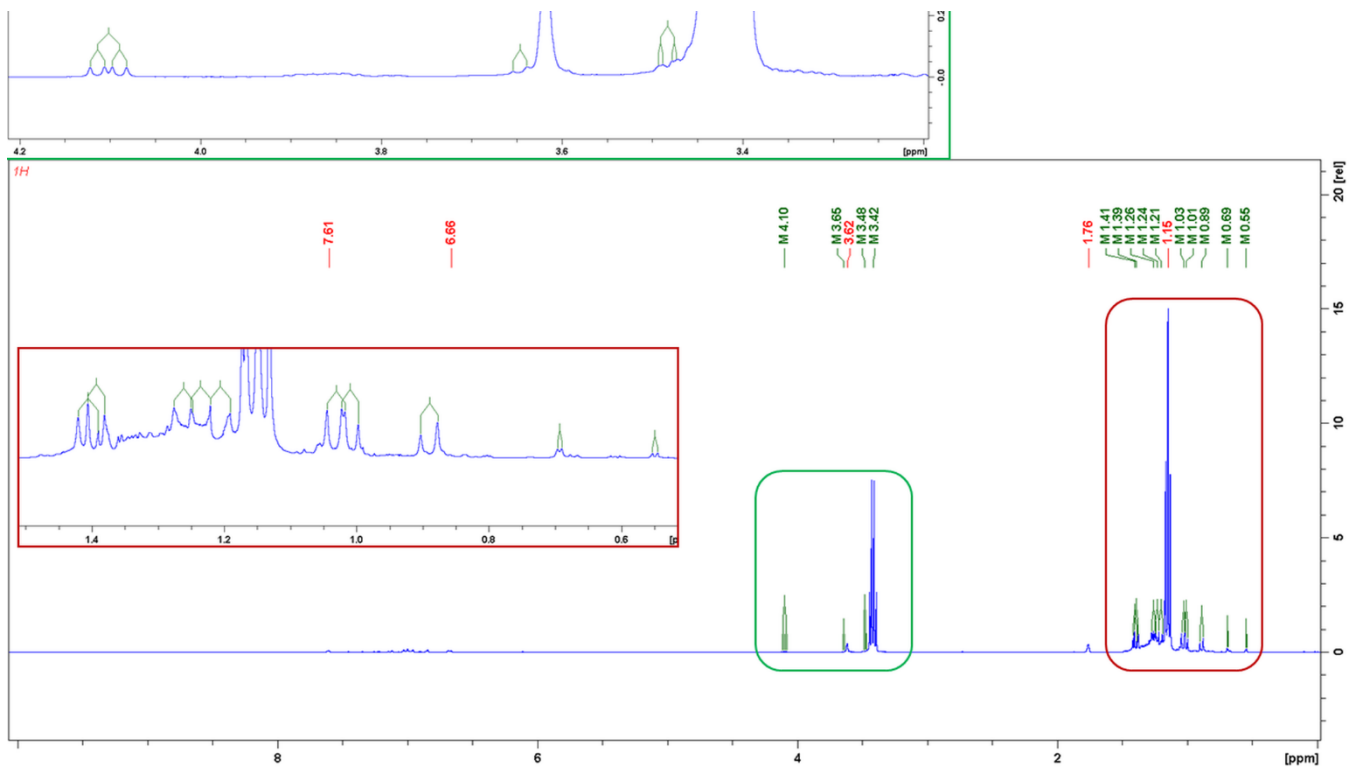

**Figure 35.**  $^1\text{H}$  NMR spectrum of reaction mixture of  $(3,5\text{-}t\text{Bu}_2\text{C}_6\text{H}_3)(\text{H})\text{C}=\text{P}-\text{P}t\text{Bu}_2$  (**3**) with MeLi in  $\text{THF-d}_8$ .

**Table 17.** Description of signals observed on the  $^1\text{H}$  NMR spectrum of reaction mixture of  $(3,5\text{-}t\text{Bu}_2\text{C}_6\text{H}_3)(\text{H})\text{C}=\text{P}-\text{P}t\text{Bu}_2$  (**3**) with  $n\text{BuLi}$  in  $\text{THF-d}_8$  – **Figure S35**.

|                                                                                                                                                                                                                                                                                                                                                                                                                                                                                                                                                                                                                                                                                                                                                                                                                                                                                                                                                                                                                                                                                                                                                                                                                                                                                                                                                                                                                                                                                                                                                                                                                                                                                                                                                                                                                     |                                                                                                                                                                                                           |
|---------------------------------------------------------------------------------------------------------------------------------------------------------------------------------------------------------------------------------------------------------------------------------------------------------------------------------------------------------------------------------------------------------------------------------------------------------------------------------------------------------------------------------------------------------------------------------------------------------------------------------------------------------------------------------------------------------------------------------------------------------------------------------------------------------------------------------------------------------------------------------------------------------------------------------------------------------------------------------------------------------------------------------------------------------------------------------------------------------------------------------------------------------------------------------------------------------------------------------------------------------------------------------------------------------------------------------------------------------------------------------------------------------------------------------------------------------------------------------------------------------------------------------------------------------------------------------------------------------------------------------------------------------------------------------------------------------------------------------------------------------------------------------------------------------------------|-----------------------------------------------------------------------------------------------------------------------------------------------------------------------------------------------------------|
| <p>➤ from 7.61 ppm to 6.66 ppm - aromatic protons;</p>                                                                                                                                                                                                                                                                                                                                                                                                                                                                                                                                                                                                                                                                                                                                                                                                                                                                                                                                                                                                                                                                                                                                                                                                                                                                                                                                                                                                                                                                                                                                                                                                                                                                                                                                                              |                                                                                                                                                                                                           |
| 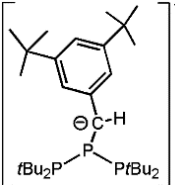                                                                                                                                                                                                                                                                                                                                                                                                                                                                                                                                                                                                                                                                                                                                                                                                                                                                                                                                                                                                                                                                                                                                                                                                                                                                                                                                                                                                                                                                                                                                                                                                                                                                                                                                   | <p><math>[\text{tBu}_2\text{P}-\text{P}-\{\text{C}(\text{H})(3,5\text{-}t\text{Bu}_2\text{C}_6\text{H}_3)\}-\text{P}t\text{Bu}_2]^-</math> (<b>2_3</b>)</p>                                               |
| <p>➤ 4.10 ppm, dd, <math>J_{\text{PH}} = 9.8</math> Hz, <math>J_{\text{HH}} = 6.4</math> Hz <math>[\text{tBu}_2\text{P}-\text{P}-\{\text{C}(\text{H})(3,5\text{-}t\text{Bu}_2\text{C}_6\text{H}_3)\}-\text{P}t\text{Bu}_2]^-</math>;</p> <p>➤ 1.39 ppm, d, <math>J_{\text{PH}} = 10.1</math> Hz, <math>[\text{tBu}_2\text{P}-\text{P}-\{\text{C}(\text{H})(3,5\text{-}t\text{Bu}_2\text{C}_6\text{H}_3)\}-\text{P}t\text{Bu}_2]^-</math>;</p> <p>➤ 1.24 ppm, d, <math>J_{\text{PH}} = 11.1</math> Hz, <math>[\text{tBu}_2\text{P}-\text{P}-\{\text{C}(\text{H})(3,5\text{-}t\text{Bu}_2\text{C}_6\text{H}_3)\}-\text{P}t\text{Bu}_2]^-</math>;</p> <p>➤ 1.03 ppm, d, <math>J_{\text{PH}} = 10.9</math> Hz, <math>[\text{tBu}_2\text{P}-\text{P}-\{\text{C}(\text{H})(3,5\text{-}t\text{Bu}_2\text{C}_6\text{H}_3)\}-\text{P}t\text{Bu}_2]^-</math>;</p> <p>➤ 1.01 ppm, d, <math>J_{\text{PH}} = 10.9</math> Hz, <math>[\text{tBu}_2\text{P}-\text{P}-\{\text{C}(\text{H})(3,5\text{-}t\text{Bu}_2\text{C}_6\text{H}_3)\}-\text{P}t\text{Bu}_2]^-</math>;</p>                                                                                                                                                                                                                                                                                                                                                                                                                                                                                                                                                                                                                                                                                                                                                        |                                                                                                                                                                                                           |
|                                                                                                                                                                                                                                                                                                                                                                                                                                                                                                                                                                                                                                                                                                                                                                                                                                                                                                                                                                                                                                                                                                                                                                                                                                                                                                                                                                                                                                                                                                                                                                                                                                                                                                                                    | <p><math>[\text{P}(\text{Me})_2-\text{CH}(3,5\text{-}t\text{Bu}_2\text{C}_6\text{H}_3)-\text{CH}(3,5\text{-}t\text{Bu}_2\text{C}_6\text{H}_3)-\text{P}-(\text{P}t\text{Bu}_2)]^-</math> (<b>3a''</b>)</p> |
| <p>➤ 3.65 ppm, broad d, <math>J_{\text{HH}} = 6.1</math> Hz, <math>[\text{P}(\text{Me})_2-\text{CH}(3,5\text{-}t\text{Bu}_2\text{C}_6\text{H}_3)-\text{CH}(3,5\text{-}t\text{Bu}_2\text{C}_6\text{H}_3)-\text{P}-(\text{P}t\text{Bu}_2)]^-</math>;</p> <p>➤ 3.48 ppm, broad dd, <math>J_{\text{HH}} = 6.0</math> Hz, <math>J_{\text{PH}} = 1.9</math> Hz <math>[\text{P}(\text{Me})_2-\text{CH}(3,5\text{-}t\text{Bu}_2\text{C}_6\text{H}_3)-\text{CH}(3,5\text{-}t\text{Bu}_2\text{C}_6\text{H}_3)-\text{P}-(\text{P}t\text{Bu}_2)]^-</math>;</p> <p>➤ 1.26 ppm, broad d, <math>J_{\text{PH}} = 11.3</math> Hz, <math>[\text{P}(\text{Me})_2-\text{CH}(3,5\text{-}t\text{Bu}_2\text{C}_6\text{H}_3)-\text{CH}(3,5\text{-}t\text{Bu}_2\text{C}_6\text{H}_3)-\text{P}-(\text{P}t\text{Bu}_2)]^-</math>;</p> <p>➤ 1.21 ppm, broad d, <math>J_{\text{PH}} = 11.3</math> Hz, <math>[\text{P}(\text{Me})_2-\text{CH}(3,5\text{-}t\text{Bu}_2\text{C}_6\text{H}_3)-\text{CH}(3,5\text{-}t\text{Bu}_2\text{C}_6\text{H}_3)-\text{P}-(\text{P}t\text{Bu}_2)]^-</math>;</p> <p>➤ 0.89 ppm, <math>J_{\text{PH}} = 12.3</math> Hz, <math>[\text{P}(\text{Me})_2-\text{CH}(3,5\text{-}t\text{Bu}_2\text{C}_6\text{H}_3)-\text{CH}(3,5\text{-}t\text{Bu}_2\text{C}_6\text{H}_3)-\text{P}-(\text{P}t\text{Bu}_2)]^-</math>;</p> <p>➤ 0.69 ppm, d, <math>J_{\text{PH}} = 2.4</math> Hz, <math>[\text{P}(\text{Me})_2-\text{CH}(3,5\text{-}t\text{Bu}_2\text{C}_6\text{H}_3)-\text{CH}(3,5\text{-}t\text{Bu}_2\text{C}_6\text{H}_3)-\text{P}-(\text{P}t\text{Bu}_2)]^-</math>;</p> <p>➤ 0.55 ppm, d, <math>J_{\text{PH}} = 2.4</math> Hz, <math>[\text{P}(\text{Me})_2-\text{CH}(3,5\text{-}t\text{Bu}_2\text{C}_6\text{H}_3)-\text{CH}(3,5\text{-}t\text{Bu}_2\text{C}_6\text{H}_3)-\text{P}-(\text{P}t\text{Bu}_2)]^-</math>;</p> |                                                                                                                                                                                                           |
| <p><math>t\text{Bu}_2\text{PLi}</math></p> <p>➤ 1.41 ppm, d, <math>J_{\text{PH}} = 11.7</math> Hz;</p> <p>Another signals</p> <p>➤ 3.62 ppm and 1.76 ppm, <math>\text{THF-d}_8</math>;</p> <p>➤ 3.42 ppm and 1.15 ppm, <math>\text{Et}_2\text{O}</math> signals from the 1.6 M solution of <math>\text{MeLi}</math> in <math>\text{Et}_2\text{O}</math>;</p>                                                                                                                                                                                                                                                                                                                                                                                                                                                                                                                                                                                                                                                                                                                                                                                                                                                                                                                                                                                                                                                                                                                                                                                                                                                                                                                                                                                                                                                        |                                                                                                                                                                                                           |

b) with *n*BuLi

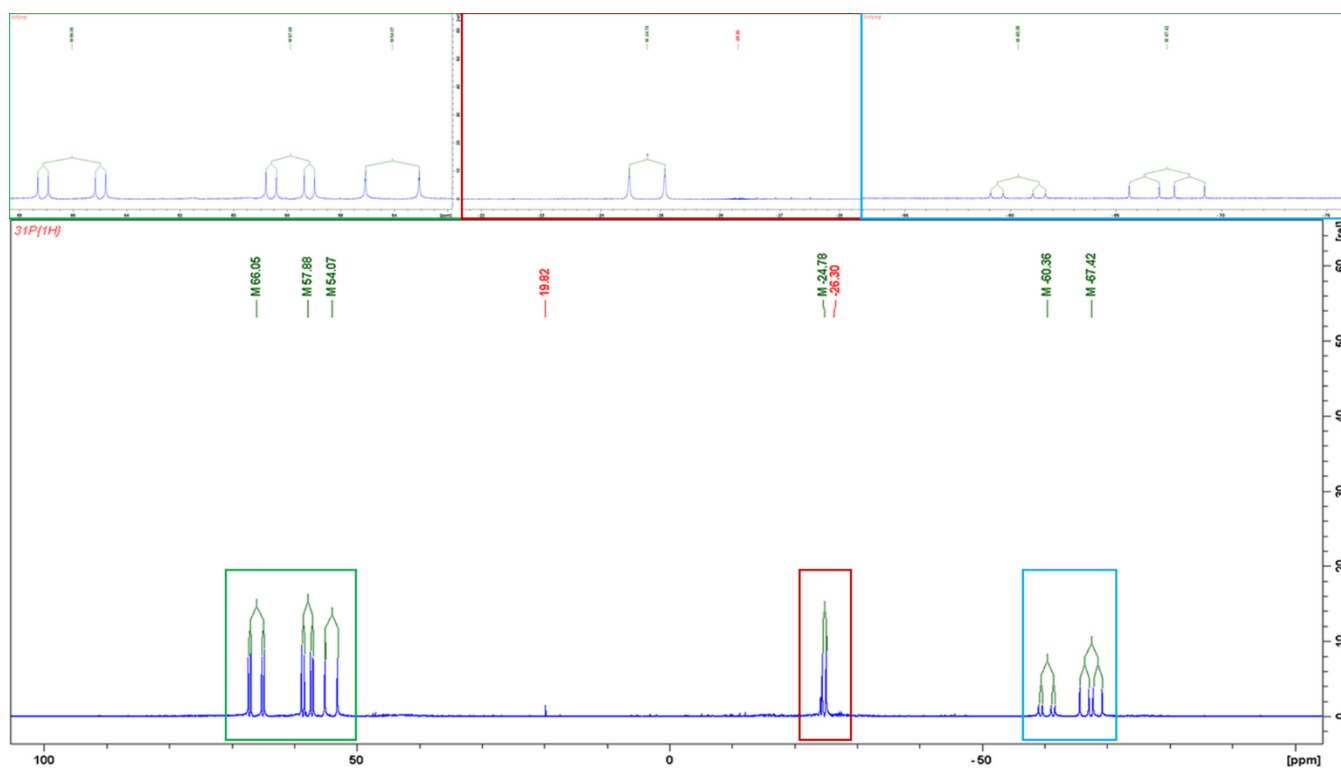

Figure 36.  $^{31}\text{P}\{^1\text{H}\}$  NMR spectrum of reaction mixture of  $(3,5\text{-}t\text{Bu}_2\text{C}_6\text{H}_3)(\text{H})\text{C}=\text{P}-\text{P}t\text{Bu}_2$  (**3**) with *n*BuLi in THF- $\text{d}_8$ .

**Table S18.** Description of signals observed on the  $^{31}\text{P}\{^1\text{H}\}$  NMR spectrum of reaction mixture of  $(3,5\text{-}t\text{Bu}_2\text{C}_6\text{H}_3)(\text{H})\text{C}=\text{P}-\text{P}t\text{Bu}_2$  (**3**) with  $n\text{BuLi}$  in  $\text{THF-d}_8$  – **Figure S36**.

|                                                                                                                                                                                                                                                                                                                                                                                                                                                                                                                                                                                                                                                                                                                                                                                                                                                                                                                                   |                                                                                                                                                                                            |
|-----------------------------------------------------------------------------------------------------------------------------------------------------------------------------------------------------------------------------------------------------------------------------------------------------------------------------------------------------------------------------------------------------------------------------------------------------------------------------------------------------------------------------------------------------------------------------------------------------------------------------------------------------------------------------------------------------------------------------------------------------------------------------------------------------------------------------------------------------------------------------------------------------------------------------------|--------------------------------------------------------------------------------------------------------------------------------------------------------------------------------------------|
|                                                                                                                                                                                                                                                                                                                                                                                                                                                                                                                                                                                                                                                                                                                                                                                                                                                                                                                                   | $[\text{tBu}_2\text{P}-\text{P}-\{\text{C}(\text{H})(3,5\text{-}t\text{Bu}_2\text{C}_6\text{H}_3)\}-\text{P}t\text{Bu}_2]^-$ ( <b>2_3</b> )                                                |
| <ul style="list-style-type: none"> <li>➤ 66.05 ppm, dd, <math>J_{\text{PP}} = 347.5</math> Hz, <math>J_{\text{PP}} = 62.5</math> Hz, <math>[\text{tBu}_2\text{P}-\text{P}-\{\text{C}(\text{H})(3,5\text{-}t\text{Bu}_2\text{C}_6\text{H}_3)\}-\text{P}t\text{Bu}_2]^-</math>;</li> <li>➤ 57.88 ppm, dd, <math>J_{\text{PP}} = 231.7</math> Hz, <math>J_{\text{PP}} = 62.5</math> Hz, <math>[\text{tBu}_2\text{P}-\text{P}-\{\text{C}(\text{H})(3,5\text{-}t\text{Bu}_2\text{C}_6\text{H}_3)\}-\text{P}t\text{Bu}_2]^-</math>;</li> <li>➤ -67.42 ppm, dd, <math>J_{\text{PP}} = 347.5</math> Hz, <math>J_{\text{PP}} = 231.7</math> Hz, <math>[[\text{tBu}_2\text{P}-\text{P}-\{\text{C}(\text{H})(3,5\text{-}t\text{Bu}_2\text{C}_6\text{H}_3)\}-\text{P}t\text{Bu}_2]^-]</math>;</li> </ul>                                                                                                                                      |                                                                                                                                                                                            |
|                                                                                                                                                                                                                                                                                                                                                                                                                                                                                                                                                                                                                                                                                                                                                                                                                                                                                                                                   | $[\text{P}(n\text{Bu})_2-\text{CH}(3,5\text{-}t\text{Bu}_2\text{C}_6\text{H}_3)-\text{CH}(3,5\text{-}t\text{Bu}_2\text{C}_6\text{H}_3)-\text{P}-(\text{P}t\text{Bu}_2)]^-$ ( <b>3b''</b> ) |
| <ul style="list-style-type: none"> <li>➤ 54.07 ppm, dd, <math>J_{\text{PP}} = 325.2</math> Hz, <math>J_{\text{PP}} = 2.6</math> Hz, <math>[\text{P}(n\text{Bu})_2-\text{CH}(3,5\text{-}t\text{Bu}_2\text{C}_6\text{H}_3)-\text{CH}(3,5\text{-}t\text{Bu}_2\text{C}_6\text{H}_3)-\text{P}-(\text{P}t\text{Bu}_2)]^-</math>;</li> <li>➤ -24.07 ppm, dd, <math>J_{\text{PP}} = 96.8</math> Hz, <math>J_{\text{PP}} = 2.6</math> Hz, <math>[\text{P}(n\text{Bu})_2-\text{CH}(3,5\text{-}t\text{Bu}_2\text{C}_6\text{H}_3)-\text{CH}(3,5\text{-}t\text{Bu}_2\text{C}_6\text{H}_3)-\text{P}-(\text{P}t\text{Bu}_2)]^-</math>;</li> <li>➤ -60.36 ppm, dd, <math>J_{\text{PP}} = 325.2</math> Hz, <math>J_{\text{PP}} = 96.8</math> Hz, <math>[\text{P}(n\text{Bu})_2-\text{CH}(3,5\text{-}t\text{Bu}_2\text{C}_6\text{H}_3)-\text{CH}(3,5\text{-}t\text{Bu}_2\text{C}_6\text{H}_3)-\text{P}-(\text{P}t\text{Bu}_2)]^-</math>;</li> </ul> |                                                                                                                                                                                            |

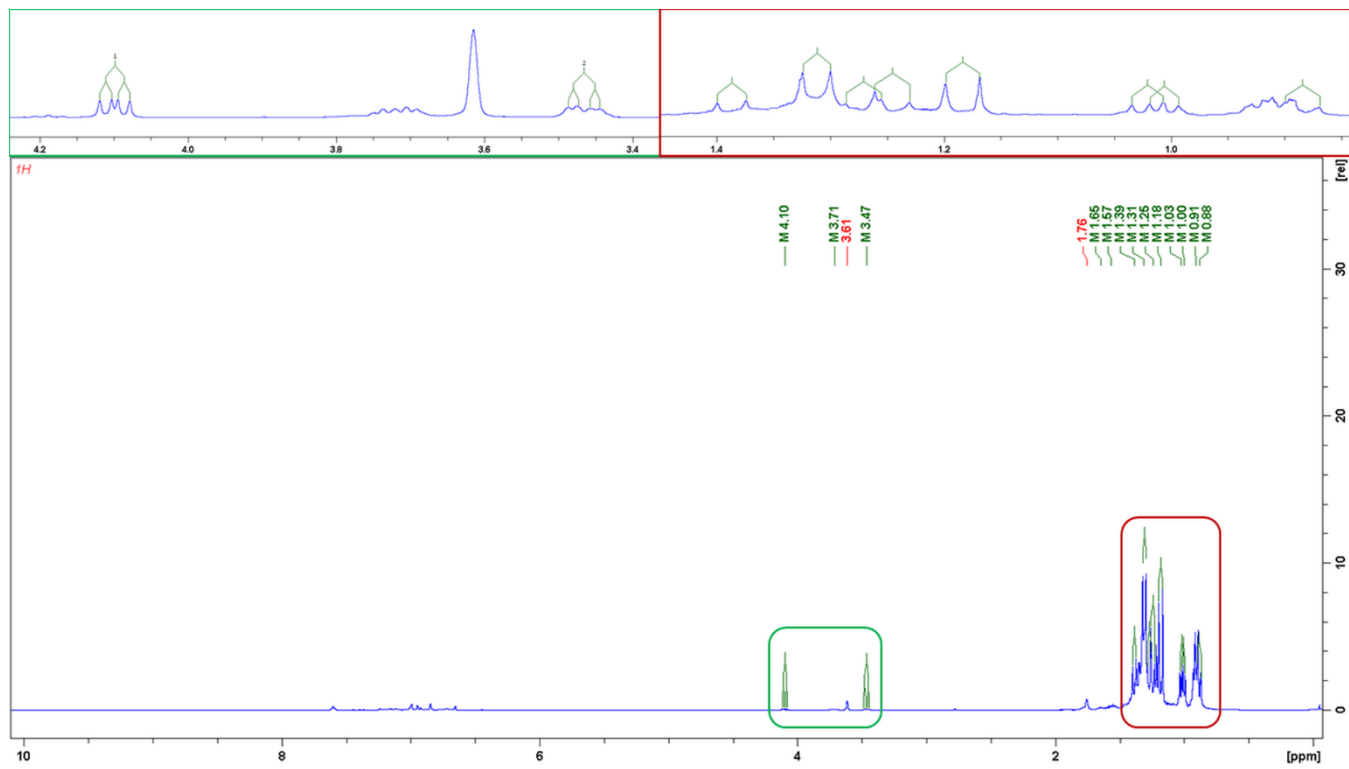

**Figure S37.**  $^1\text{H}$  NMR spectrum of reaction mixture of  $(3,5\text{-}t\text{Bu}_2\text{C}_6\text{H}_3)(\text{H})\text{C}=\text{P}-\text{P}t\text{Bu}_2$  (**3**) with  $n\text{BuLi}$  in  $\text{THF-}d_8$ .



**Table 19.** Description of signals observed on the  $^1\text{H}$  NMR spectrum of reaction mixture of (3,5-*t*Bu<sub>2</sub>C<sub>6</sub>H<sub>3</sub>)(H)C=P-*Pt*Bu<sub>2</sub> (**3**) with *n*BuLi in THF-d<sub>8</sub> – **Figure S37**.

|                                                                                                                                                                                                                                                                                                                                                                                                                                                                                                                                                                                                                                                                                                                                                                                                                                                                                                                                                                                                                                                                                                                                                                                                                                                                                                                                                                                                                                                                                                                                                                                                                                                                                                                                                                                                                                                                                                                                                                                                                                                                                                                                                                                                                                                                                                                                                                                                                                                                                                                                                                                                                                                                                                                                                                                                                                                                                                      |                                                                                                                                                                                                                                         |
|------------------------------------------------------------------------------------------------------------------------------------------------------------------------------------------------------------------------------------------------------------------------------------------------------------------------------------------------------------------------------------------------------------------------------------------------------------------------------------------------------------------------------------------------------------------------------------------------------------------------------------------------------------------------------------------------------------------------------------------------------------------------------------------------------------------------------------------------------------------------------------------------------------------------------------------------------------------------------------------------------------------------------------------------------------------------------------------------------------------------------------------------------------------------------------------------------------------------------------------------------------------------------------------------------------------------------------------------------------------------------------------------------------------------------------------------------------------------------------------------------------------------------------------------------------------------------------------------------------------------------------------------------------------------------------------------------------------------------------------------------------------------------------------------------------------------------------------------------------------------------------------------------------------------------------------------------------------------------------------------------------------------------------------------------------------------------------------------------------------------------------------------------------------------------------------------------------------------------------------------------------------------------------------------------------------------------------------------------------------------------------------------------------------------------------------------------------------------------------------------------------------------------------------------------------------------------------------------------------------------------------------------------------------------------------------------------------------------------------------------------------------------------------------------------------------------------------------------------------------------------------------------------|-----------------------------------------------------------------------------------------------------------------------------------------------------------------------------------------------------------------------------------------|
|                                                                                                                                                                                                                                                                                                                                                                                                                                                                                                                                                                                                                                                                                                                                                                                                                                                                                                                                                                                                                                                                                                                                                                                                                                                                                                                                                                                                                                                                                                                                                                                                                                                                                                                                                                                                                                                                                                                                                                                                                                                                                                                                                                                                                                                                                                                                                                                                                                                                                                                                                                                                                                                                                                                                                                                                                                                                                                      | $[\textit{t}\text{Bu}_2\text{P-P}\{-\text{C}(\text{H})(3,5\text{-}\textit{t}\text{Bu}_2\text{C}_6\text{H}_3)\}\text{-P}\textit{t}\text{Bu}_2]^-$ ( <b>2_3</b> )                                                                         |
| <ul style="list-style-type: none"> <li>➤ 4.10 ppm, dd, <math>J_{\text{PH}} = 9.8</math> Hz, <math>J_{\text{HH}} = 6.4</math> Hz [<math>\textit{t}\text{Bu}_2\text{P-P}\{-\text{C}(\text{H})(3,5\text{-}\textit{t}\text{Bu}_2\text{C}_6\text{H}_3)\}\text{-P}\textit{t}\text{Bu}_2</math>];</li> <li>➤ 1.39 ppm, d, <math>J_{\text{PH}} = 10.3</math> Hz, [<math>\textit{t}\text{Bu}_2\text{P-P}\{-\text{C}(\text{H})(3,5\text{-}\textit{t}\text{Bu}_2\text{C}_6\text{H}_3)\}\text{-P}\textit{t}\text{Bu}_2</math>];</li> <li>➤ 1.25 ppm, d, <math>J_{\text{PH}} = 12.2</math> Hz, [<math>\textit{t}\text{Bu}_2\text{P-P}\{-\text{C}(\text{H})(3,5\text{-}\textit{t}\text{Bu}_2\text{C}_6\text{H}_3)\}\text{-P}\textit{t}\text{Bu}_2</math>];</li> <li>➤ 1.03 ppm, d, <math>J_{\text{PH}} = 11.0</math> Hz, [<math>\textit{t}\text{Bu}_2\text{P-P}\{-\text{C}(\text{H})(3,5\text{-}\textit{t}\text{Bu}_2\text{C}_6\text{H}_3)\}\text{-P}\textit{t}\text{Bu}_2</math>];</li> <li>➤ 1.00 ppm, d, <math>J_{\text{PH}} = 10.9</math> Hz, [<math>\textit{t}\text{Bu}_2\text{P-P}\{-\text{C}(\text{H})(3,5\text{-}\textit{t}\text{Bu}_2\text{C}_6\text{H}_3)\}\text{-P}\textit{t}\text{Bu}_2</math>]</li> </ul>                                                                                                                                                                                                                                                                                                                                                                                                                                                                                                                                                                                                                                                                                                                                                                                                                                                                                                                                                                                                                                                                                                                                                                                                                                                                                                                                                                                                                                                                                                                                                                                                                                                                                             |                                                                                                                                                                                                                                         |
|                                                                                                                                                                                                                                                                                                                                                                                                                                                                                                                                                                                                                                                                                                                                                                                                                                                                                                                                                                                                                                                                                                                                                                                                                                                                                                                                                                                                                                                                                                                                                                                                                                                                                                                                                                                                                                                                                                                                                                                                                                                                                                                                                                                                                                                                                                                                                                                                                                                                                                                                                                                                                                                                                                                                                                                                                                                                                                      | $[\text{P}(\textit{n}\text{Bu})_2\text{-CH}(3,5\text{-}\textit{t}\text{Bu}_2\text{C}_6\text{H}_3)\text{-CH}(3,5\text{-}\textit{t}\text{Bu}_2\text{C}_6\text{H}_3)\text{-P}\text{-}(\textit{P}\textit{t}\text{Bu}_2)]^-$ ( <b>3b''</b> ) |
| <ul style="list-style-type: none"> <li>➤ 3.71 ppm, broad m, [<math>\text{P}(\textit{n}\text{Bu})_2\text{-CH}(3,5\text{-}\textit{t}\text{Bu}_2\text{C}_6\text{H}_3)\text{-CH}(3,5\text{-}\textit{t}\text{Bu}_2\text{C}_6\text{H}_3)\text{-P}\text{-}(\textit{P}\textit{t}\text{Bu}_2)</math>];</li> <li>➤ 3.47 ppm, broad dd, <math>J_{\text{PH}} = 9.8</math> Hz, <math>J_{\text{HH}} = 6.4</math> Hz [<math>\text{P}(\textit{n}\text{Bu})_2\text{-CH}(3,5\text{-}\textit{t}\text{Bu}_2\text{C}_6\text{H}_3)\text{-CH}(3,5\text{-}\textit{t}\text{Bu}_2\text{C}_6\text{H}_3)\text{-P}\text{-}(\textit{P}\textit{t}\text{Bu}_2)</math>];</li> <li>➤ 1.65 ppm, broad m, [<math>\text{P}(\textit{n}\text{Bu})_2\text{-CH}(3,5\text{-}\textit{t}\text{Bu}_2\text{C}_6\text{H}_3)\text{-CH}(3,5\text{-}\textit{t}\text{Bu}_2\text{C}_6\text{H}_3)\text{-P}\text{-}(\textit{P}\textit{t}\text{Bu}_2)</math>];</li> <li>➤ 1.57 ppm, broad m, [<math>\text{P}(\textit{n}\text{Bu})_2\text{-CH}(3,5\text{-}\textit{t}\text{Bu}_2\text{C}_6\text{H}_3)\text{-CH}(3,5\text{-}\textit{t}\text{Bu}_2\text{C}_6\text{H}_3)\text{-P}\text{-}(\textit{P}\textit{t}\text{Bu}_2)</math>];</li> <li>➤ 1.31 ppm, broad d, <math>J_{\text{PH}} = 10.3</math> Hz, [<math>\text{P}(\textit{n}\text{Bu})_2\text{-CH}(3,5\text{-}\textit{t}\text{Bu}_2\text{C}_6\text{H}_3)\text{-CH}(3,5\text{-}\textit{t}\text{Bu}_2\text{C}_6\text{H}_3)\text{-P}\text{-}(\textit{P}\textit{t}\text{Bu}_2)</math>];</li> <li>➤ 1.27 ppm, broad d, <math>J_{\text{PH}} = 12.5</math> Hz, [<math>\text{P}(\textit{n}\text{Bu})_2\text{-CH}(3,5\text{-}\textit{t}\text{Bu}_2\text{C}_6\text{H}_3)\text{-CH}(3,5\text{-}\textit{t}\text{Bu}_2\text{C}_6\text{H}_3)\text{-P}\text{-}(\textit{P}\textit{t}\text{Bu}_2)</math>];</li> <li>➤ 1.18 ppm, broad d, [<math>\text{P}(\textit{n}\text{Bu})_2\text{-CH}(3,5\text{-}\textit{t}\text{Bu}_2\text{C}_6\text{H}_3)\text{-CH}(3,5\text{-}\textit{t}\text{Bu}_2\text{C}_6\text{H}_3)\text{-P}\text{-}(\textit{P}\textit{t}\text{Bu}_2)</math>];</li> <li>➤ 1.03 ppm, broad m, [<math>\text{P}(\textit{n}\text{Bu})_2\text{-CH}(3,5\text{-}\textit{t}\text{Bu}_2\text{C}_6\text{H}_3)\text{-CH}(3,5\text{-}\textit{t}\text{Bu}_2\text{C}_6\text{H}_3)\text{-P}\text{-}(\textit{P}\textit{t}\text{Bu}_2)</math>];</li> <li>➤ 0.91 ppm, broad m, [<math>\text{P}(\textit{n}\text{Bu})_2\text{-CH}(3,5\text{-}\textit{t}\text{Bu}_2\text{C}_6\text{H}_3)\text{-CH}(3,5\text{-}\textit{t}\text{Bu}_2\text{C}_6\text{H}_3)\text{-P}\text{-}(\textit{P}\textit{t}\text{Bu}_2)</math>];</li> <li>➤ 0.88 ppm, broad d, <math>J_{\text{PH}} = 12.1</math> Hz, [<math>\text{P}(\textit{n}\text{Bu})_2\text{-CH}(3,5\text{-}\textit{t}\text{Bu}_2\text{C}_6\text{H}_3)\text{-CH}(3,5\text{-}\textit{t}\text{Bu}_2\text{C}_6\text{H}_3)\text{-P}\text{-}(\textit{P}\textit{t}\text{Bu}_2)</math>];</li> </ul> |                                                                                                                                                                                                                                         |

a) with *t*BuLi

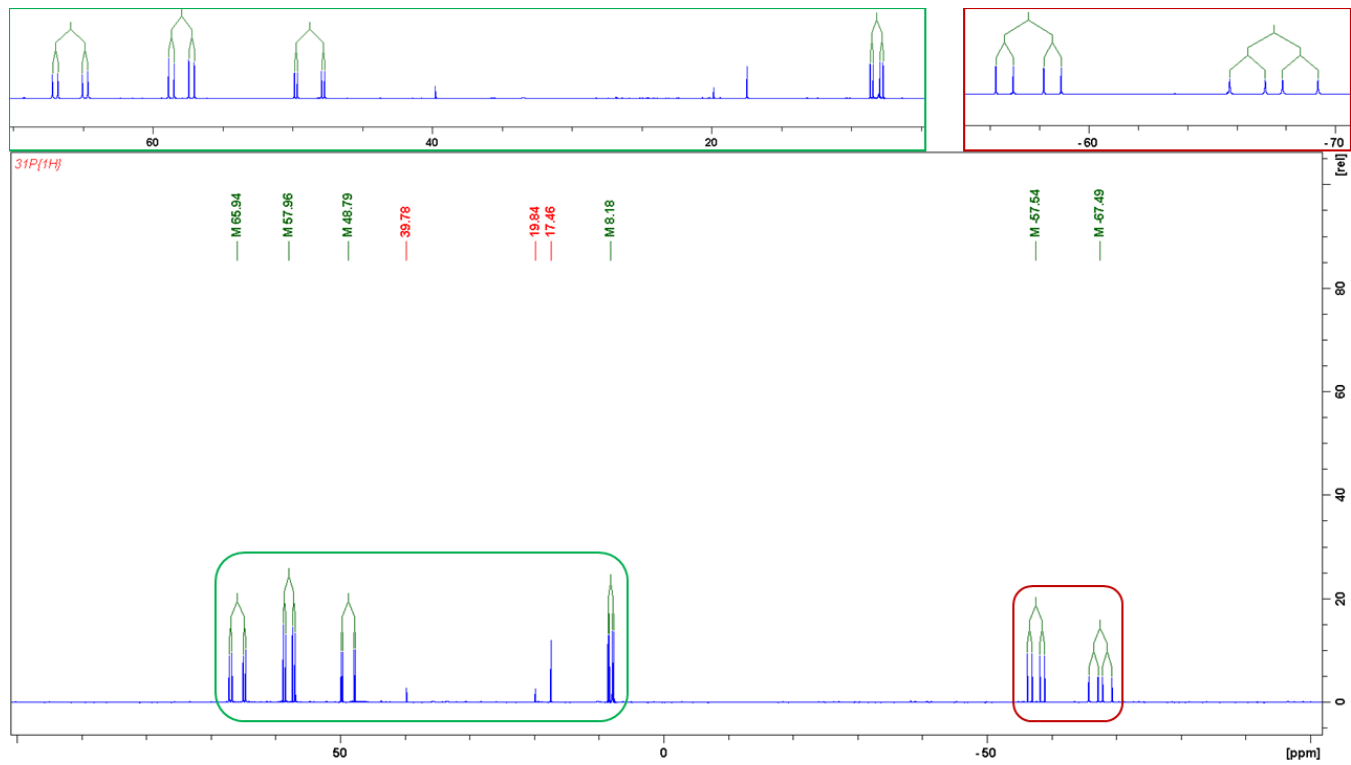

**Figure S38.**  $^{31}\text{P}\{^1\text{H}\}$  NMR spectrum of reaction mixture of  $(3,5\text{-}t\text{Bu}_2\text{C}_6\text{H}_3)(\text{H})\text{C}=\text{P}-t\text{Bu}_2$  (**3**) with *t*BuLi in THF- $\text{d}_8$ .

**Table S20.** Description of signals observed on the  $^{31}\text{P}\{^1\text{H}\}$  NMR spectrum of reaction mixture of  $(3,5\text{-}t\text{Bu}_2\text{C}_6\text{H}_3)(\text{H})\text{C}=\text{P}-\text{P}t\text{Bu}_2$  (**3**) with  $n\text{BuLi}$  in  $\text{THF-d}_8$  – **Figure 38**.

|                                                                                                                                                                                                                          |                                                                                                                                                                                            |
|--------------------------------------------------------------------------------------------------------------------------------------------------------------------------------------------------------------------------|--------------------------------------------------------------------------------------------------------------------------------------------------------------------------------------------|
| 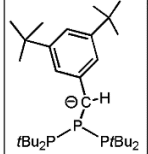                                                                                                                                        | $[\text{tBu}_2\text{P}-\text{P}-\{\text{C}(\text{H})(3,5\text{-}t\text{Bu}_2\text{C}_6\text{H}_3)\}-\text{P}t\text{Bu}_2]^-$ ( <b>2_3</b> )                                                |
|                                                                                                                                         | $[\text{P}(t\text{Bu})_2-\text{CH}(3,5\text{-}t\text{Bu}_2\text{C}_6\text{H}_3)-\text{CH}(3,5\text{-}t\text{Bu}_2\text{C}_6\text{H}_3)-\text{P}-(\text{P}t\text{Bu}_2)]^-$ ( <b>3c''</b> ) |
|                                                                                                                                        | $[(3,5\text{-}t\text{Bu}_2\text{C}_6\text{H}_3)(\text{H})\text{C}-\text{P}(t\text{Bu})_2]^-$ ( <b>3a'</b> )                                                                                |
| <p><math>t\text{Bu}_2\text{PLi}</math></p> <ul style="list-style-type: none"> <li>➤ 39.78 ppm, s;</li> </ul> <p><math>t\text{Bu}_2\text{PH}</math></p> <ul style="list-style-type: none"> <li>➤ 19.84 ppm, s;</li> </ul> |                                                                                                                                                                                            |

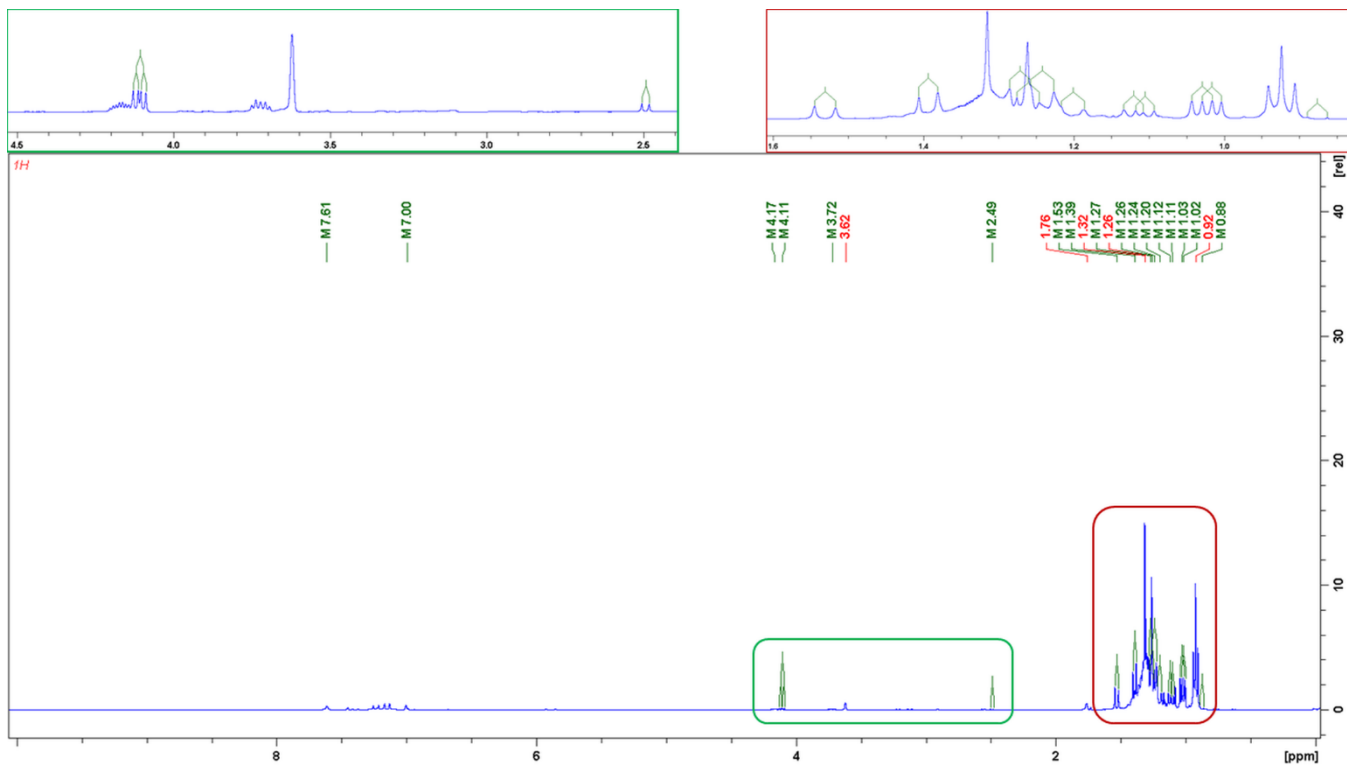

**Figure S39.**  $^1\text{H}$  NMR spectrum of reaction mixture of  $(3,5\text{-}t\text{Bu}_2\text{C}_6\text{H}_3)(\text{H})\text{C}=\text{P}-\text{P}t\text{Bu}_2$  (**3**) with  $t\text{BuLi}$  in  $\text{THF-d}_8$ .

**Table S21.** Description of signals observed on the  $^1\text{H}$  NMR spectrum of reaction mixture of  $(3,5\text{-}t\text{Bu}_2\text{C}_6\text{H}_3)(\text{H})\text{C}=\text{P}-\text{P}t\text{Bu}_2$  (**4**) with  $t\text{BuLi}$  in  $\text{THF-d}_8$  – **Figure S39**.

|                                                                                                                                                                                                                                                                                                                                                                                                                                                                                                                                                                                                                                                                                                                                                                                                                                                                                                                                                                                                                                                                                                                                                                                                                                                                                                                                                                                                                                                                                                                                                                                                                                                                                                                                                                                 |                                                                                                                                                                                             |
|---------------------------------------------------------------------------------------------------------------------------------------------------------------------------------------------------------------------------------------------------------------------------------------------------------------------------------------------------------------------------------------------------------------------------------------------------------------------------------------------------------------------------------------------------------------------------------------------------------------------------------------------------------------------------------------------------------------------------------------------------------------------------------------------------------------------------------------------------------------------------------------------------------------------------------------------------------------------------------------------------------------------------------------------------------------------------------------------------------------------------------------------------------------------------------------------------------------------------------------------------------------------------------------------------------------------------------------------------------------------------------------------------------------------------------------------------------------------------------------------------------------------------------------------------------------------------------------------------------------------------------------------------------------------------------------------------------------------------------------------------------------------------------|---------------------------------------------------------------------------------------------------------------------------------------------------------------------------------------------|
| ➤ from 7.61 ppm to 7.00 ppm – aromatic protons;                                                                                                                                                                                                                                                                                                                                                                                                                                                                                                                                                                                                                                                                                                                                                                                                                                                                                                                                                                                                                                                                                                                                                                                                                                                                                                                                                                                                                                                                                                                                                                                                                                                                                                                                 |                                                                                                                                                                                             |
| 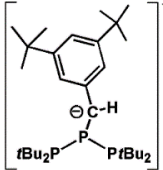                                                                                                                                                                                                                                                                                                                                                                                                                                                                                                                                                                                                                                                                                                                                                                                                                                                                                                                                                                                                                                                                                                                                                                                                                                                                                                                                                                                                                                                                                                                                                                                                                                                                                               | $[\text{tBu}_2\text{P}-\text{P}-\{\text{C}(\text{H})(3,5\text{-}t\text{Bu}_2\text{C}_6\text{H}_3)\}-\text{P}t\text{Bu}_2]^-$<br><b>(2_3)</b>                                                |
| <ul style="list-style-type: none"> <li>➤ 4.11 ppm, dd, <math>J_{\text{PH}} = 9.8</math> Hz, <math>J_{\text{HH}} = 6.4</math> Hz <math>[\text{tBu}_2\text{P}-\text{P}-\{\text{C}(\text{H})(3,5\text{-}t\text{Bu}_2\text{C}_6\text{H}_3)\}-\text{P}t\text{Bu}_2]^-</math>;</li> <li>➤ 1.39 ppm, d, <math>J_{\text{PH}} = 10.3</math> Hz, <math>[\text{tBu}_2\text{P}-\text{P}-\{\text{C}(\text{H})(3,5\text{-}t\text{Bu}_2\text{C}_6\text{H}_3)\}-\text{P}t\text{Bu}_2]^-</math>;</li> <li>➤ 1.24 ppm, d, <math>J_{\text{PH}} = 12.2</math> Hz, <math>[\text{tBu}_2\text{P}-\text{P}-\{\text{C}(\text{H})(3,5\text{-}t\text{Bu}_2\text{C}_6\text{H}_3)\}-\text{P}t\text{Bu}_2]^-</math>;</li> <li>➤ 1.03 ppm, d, <math>J_{\text{PH}} = 10.9</math> Hz, <math>[\text{tBu}_2\text{P}-\text{P}-\{\text{C}(\text{H})(3,5\text{-}t\text{Bu}_2\text{C}_6\text{H}_3)\}-\text{P}t\text{Bu}_2]^-</math>;</li> <li>➤ 1.02 ppm, d, <math>J_{\text{PH}} = 10.1</math> Hz, <math>[\text{tBu}_2\text{P}-\text{P}-\{\text{C}(\text{H})(3,5\text{-}t\text{Bu}_2\text{C}_6\text{H}_3)\}-\text{P}t\text{Bu}_2]^-</math></li> </ul>                                                                                                                                                                                                                                                                                                                                                                                                                                                                                                                                                                                                                                                                  |                                                                                                                                                                                             |
|                                                                                                                                                                                                                                                                                                                                                                                                                                                                                                                                                                                                                                                                                                                                                                                                                                                                                                                                                                                                                                                                                                                                                                                                                                                                                                                                                                                                                                                                                                                                                                                                                                                                                                | $[\text{P}(t\text{Bu})_2-\text{CH}(3,5\text{-}t\text{Bu}_2\text{C}_6\text{H}_3)-\text{CH}(3,5\text{-}t\text{Bu}_2\text{C}_6\text{H}_3)-\text{P}-(\text{P}t\text{Bu}_2)]^-$<br><b>(3c'')</b> |
| <ul style="list-style-type: none"> <li>➤ 4.17 ppm, broad m, <math>[\text{P}(t\text{Bu})_2-\text{CH}(3,5\text{-}t\text{Bu}_2\text{C}_6\text{H}_3)-\text{CH}(3,5\text{-}t\text{Bu}_2\text{C}_6\text{H}_3)-\text{P}-(\text{P}t\text{Bu}_2)]^-</math>;</li> <li>➤ 3.72 ppm, broad m, <math>[\text{P}(n\text{Bu})_2-\text{CH}(3,5\text{-}t\text{Bu}_2\text{C}_6\text{H}_3)-\text{CH}(3,5\text{-}t\text{Bu}_2\text{C}_6\text{H}_3)-\text{P}-(\text{P}t\text{Bu}_2)]^-</math>;</li> <li>➤ 1.53 ppm, d, <math>J_{\text{PH}} = 11.2</math> Hz, <math>[\text{P}(t\text{Bu})_2-\text{CH}(3,5\text{-}t\text{Bu}_2\text{C}_6\text{H}_3)-\text{CH}(3,5\text{-}t\text{Bu}_2\text{C}_6\text{H}_3)-\text{P}-(\text{P}t\text{Bu}_2)]^-</math>;</li> <li>➤ 1.27 ppm, broad d, <math>J_{\text{PH}} = 11.3</math> Hz, <math>[\text{P}(t\text{Bu})_2-\text{CH}(3,5\text{-}t\text{Bu}_2\text{C}_6\text{H}_3)-\text{CH}(3,5\text{-}t\text{Bu}_2\text{C}_6\text{H}_3)-\text{P}-(\text{P}t\text{Bu}_2)]^-</math>;</li> <li>➤ 1.26 ppm, d, <math>J_{\text{PH}} = 11.7</math> Hz, <math>[\text{P}(t\text{Bu})_2-\text{CH}(3,5\text{-}t\text{Bu}_2\text{C}_6\text{H}_3)-\text{CH}(3,5\text{-}t\text{Bu}_2\text{C}_6\text{H}_3)-\text{P}-(\text{P}t\text{Bu}_2)]^-</math>;</li> <li>➤ 1.20 ppm, d, broad d, <math>J_{\text{PH}} = 12.1</math> Hz, <math>[\text{P}(t\text{Bu})_2-\text{CH}(3,5\text{-}t\text{Bu}_2\text{C}_6\text{H}_3)-\text{CH}(3,5\text{-}t\text{Bu}_2\text{C}_6\text{H}_3)-\text{P}-(\text{P}t\text{Bu}_2)]^-</math>;</li> <li>➤ 0.88 ppm, broad d, <math>J_{\text{PH}} = 10.6</math> Hz, <math>[\text{P}(t\text{Bu})_2-\text{CH}(3,5\text{-}t\text{Bu}_2\text{C}_6\text{H}_3)-\text{CH}(3,5\text{-}t\text{Bu}_2\text{C}_6\text{H}_3)-\text{P}-(\text{P}t\text{Bu}_2)]^-</math></li> </ul> |                                                                                                                                                                                             |
|                                                                                                                                                                                                                                                                                                                                                                                                                                                                                                                                                                                                                                                                                                                                                                                                                                                                                                                                                                                                                                                                                                                                                                                                                                                                                                                                                                                                                                                                                                                                                                                                                                                                                              | $[(3,5\text{-}t\text{Bu}_2\text{C}_6\text{H}_3)(\text{H})\text{C}-\text{P}(t\text{Bu})_2]^-$<br><b>(3c')</b>                                                                                |
| <ul style="list-style-type: none"> <li>➤ 2.49 ppm, d, <math>J_{\text{PH}} = 10.4</math> Hz, <math>[(3,5\text{-}t\text{Bu}_2\text{C}_6\text{H}_3)(\text{H})\text{C}-\text{P}(t\text{Bu})_2]^-</math>;</li> <li>➤ 1.12 ppm, d, <math>J_{\text{PH}} = 10.4</math> Hz, <math>[(3,5\text{-}t\text{Bu}_2\text{C}_6\text{H}_3)(\text{H})\text{C}-\text{P}(t\text{Bu})_2]^-</math>;</li> <li>➤ 1.11 ppm, d, <math>J_{\text{PH}} = 9.8</math> Hz, <math>[(3,5\text{-}t\text{Bu}_2\text{C}_6\text{H}_3)(\text{H})\text{C}-\text{P}(t\text{Bu})_2]^-</math>;</li> </ul> <p>The weak signals of the <math>t\text{Bu}</math> group from 3 and 5 positions in the phenyl ring were not found (probably obscured by pentane signals)</p>                                                                                                                                                                                                                                                                                                                                                                                                                                                                                                                                                                                                                                                                                                                                                                                                                                                                                                                                                                                                                                                       |                                                                                                                                                                                             |
| <p>Another signals</p> <ul style="list-style-type: none"> <li>➤ 1.32 ppm, 1.26 ppm, 0.92 ppm, signals from the pentane solution of <math>t\text{BuLi}</math>;</li> <li>➤ 3.62 ppm and 1.76 ppm, <math>\text{THF-d}_8</math>;</li> </ul>                                                                                                                                                                                                                                                                                                                                                                                                                                                                                                                                                                                                                                                                                                                                                                                                                                                                                                                                                                                                                                                                                                                                                                                                                                                                                                                                                                                                                                                                                                                                         |                                                                                                                                                                                             |

3. Reaction of  $(p\text{-Me}_2\text{N-C}_6\text{H}_4)(\text{H})\text{C}=\text{P-PrBu}_2$  (**4**).

a) with MeLi

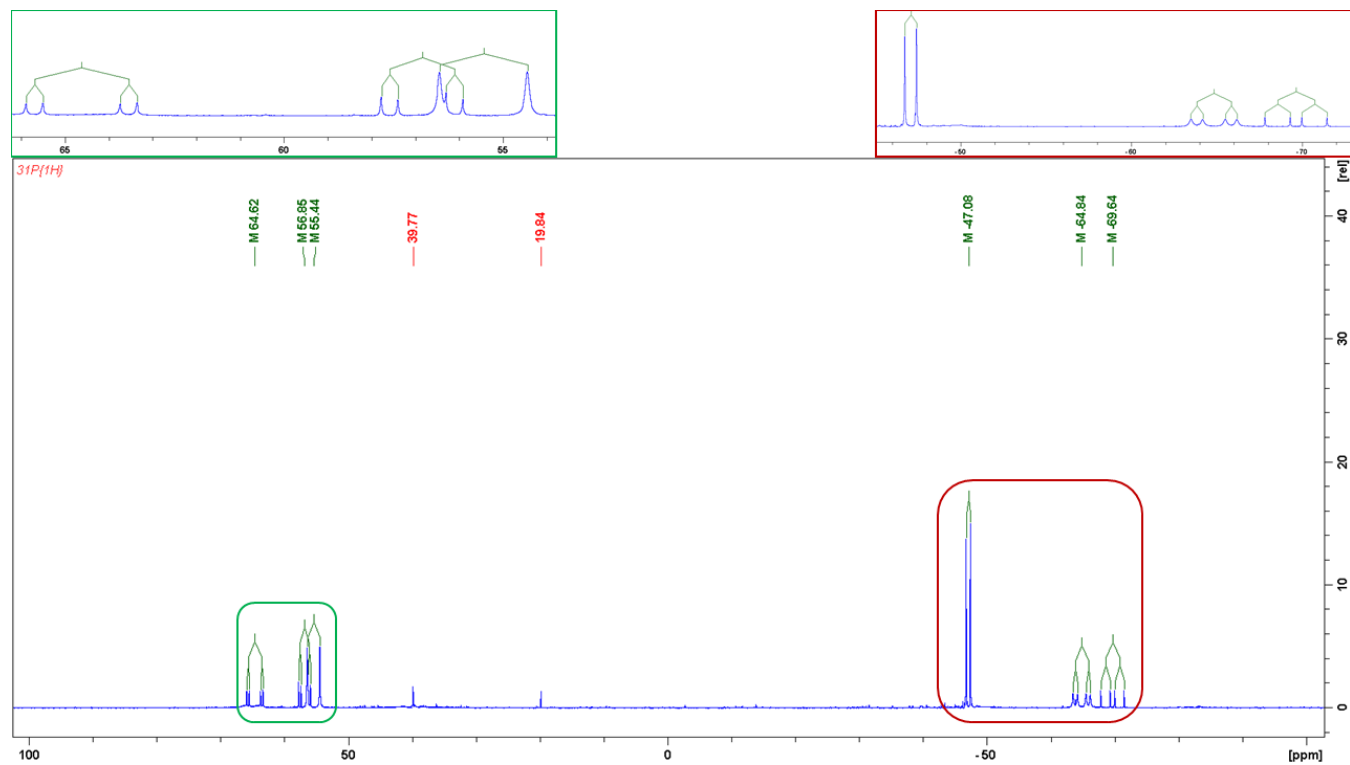

**Figure S40.**  $^{31}\text{P}\{^1\text{H}\}$  NMR spectrum of reaction mixture of  $(p\text{-Me}_2\text{N-C}_6\text{H}_4)(\text{H})\text{C}=\text{P-PrBu}_2$  (**4**) with MeLi in THF- $d_8$ .

**Table S22.** Description of signals observed on the  $^{31}\text{P}\{^1\text{H}\}$  NMR spectrum of reaction mixture of (*p*-Me<sub>2</sub>N-C<sub>6</sub>H<sub>4</sub>)(H)C=P-P*t*Bu<sub>2</sub> (**4**) with MeLi in THF-d<sub>8</sub> – **Figure S40**.

|                                                                                                                                                                                                                                                                                                                                                                                                                                                                                                                                                                                                                                                                                                                                                                                                                                                                                            |                                                                                                                                                                                                       |
|--------------------------------------------------------------------------------------------------------------------------------------------------------------------------------------------------------------------------------------------------------------------------------------------------------------------------------------------------------------------------------------------------------------------------------------------------------------------------------------------------------------------------------------------------------------------------------------------------------------------------------------------------------------------------------------------------------------------------------------------------------------------------------------------------------------------------------------------------------------------------------------------|-------------------------------------------------------------------------------------------------------------------------------------------------------------------------------------------------------|
| 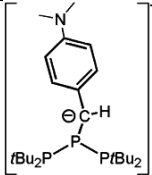                                                                                                                                                                                                                                                                                                                                                                                                                                                                                                                                                                                                                                                                                                                                                                                                          | $[\textit{t}\text{Bu}_2\text{P}-\text{P}-\{\text{C}(\text{H})(\textit{p}\text{-Me}_2\text{N-C}_6\text{H}_4)\}-\text{P}\textit{t}\text{Bu}_2]^+$<br>( <b>2_4</b> )                                     |
| <ul style="list-style-type: none"> <li>➤ 64.62 ppm, dd, <math>J_{\text{PP}} = 348.2</math> Hz, <math>J_{\text{PH}} = 62.6</math> Hz, <math>[\textit{t}\text{Bu}_2\text{P}-\text{P}-\{\text{C}(\text{H})(\textit{p}\text{-Me}_2\text{N-C}_6\text{H}_4)\}-\text{P}\textit{t}\text{Bu}_2]^+</math>;</li> <li>➤ 56.85 ppm, dd, <math>J_{\text{PP}} = 239.6</math> Hz, <math>J_{\text{PH}} = 62.6</math> Hz, <math>[\textit{t}\text{Bu}_2\text{P}-\text{P}-\{\text{C}(\text{H})(\textit{p}\text{-Me}_2\text{N-C}_6\text{H}_4)\}-\text{P}\textit{t}\text{Bu}_2]^+</math>;</li> <li>➤ -69.64 ppm, dd, <math>J_{\text{PP}} = 348.2</math> Hz, <math>J_{\text{PH}} = 239.6</math> Hz, <math>[\textit{t}\text{Bu}_2\text{P}-\text{P}-\{\text{C}(\text{H})(\textit{p}\text{-Me}_2\text{N-C}_6\text{H}_4)\}-\text{P}\textit{t}\text{Bu}_2]^+</math>;</li> </ul>                                        |                                                                                                                                                                                                       |
|                                                                                                                                                                                                                                                                                                                                                                                                                                                                                                                                                                                                                                                                                                                                                                                                           | $[\text{P}(\text{Me})_2-\text{CH}(\textit{p}\text{-Me}_2\text{N-C}_6\text{H}_4)-\text{CH}(\textit{p}\text{-Me}_2\text{N-C}_6\text{H}_4)-\text{P}(\textit{P}\textit{t}\text{Bu}_2)]^+$ ( <b>4a''</b> ) |
| <ul style="list-style-type: none"> <li>➤ 54.44 ppm, d, <math>J_{\text{PP}} = 324.7</math> Hz, <math>[\text{P}(\text{Me})_2-\text{CH}(\textit{p}\text{-Me}_2\text{N-C}_6\text{H}_4)-\text{CH}(\textit{p}\text{-Me}_2\text{N-C}_6\text{H}_4)-\text{P}(\textit{P}\textit{t}\text{Bu}_2)]^+</math>;</li> <li>➤ -47.08 ppm, d, <math>J_{\text{PP}} = 111.51</math> Hz, <math>[\text{P}(\text{Me})_2-\text{CH}(\textit{p}\text{-Me}_2\text{N-C}_6\text{H}_4)-\text{CH}(\textit{p}\text{-Me}_2\text{N-C}_6\text{H}_4)-\text{P}(\textit{P}\textit{t}\text{Bu}_2)]^+</math>;</li> <li>➤ -64.84 ppm, dd, <math>J_{\text{PP}} = 324.7</math> Hz, <math>J_{\text{PH}} = 111.51</math> Hz, <math>[\text{P}(\text{Me})_2-\text{CH}(\textit{p}\text{-Me}_2\text{N-C}_6\text{H}_4)-\text{CH}(\textit{p}\text{-Me}_2\text{N-C}_6\text{H}_4)-\text{P}(\textit{P}\textit{t}\text{Bu}_2)]^+</math>;</li> </ul> |                                                                                                                                                                                                       |
| <p><i>t</i>Bu<sub>2</sub>PLi</p> <ul style="list-style-type: none"> <li>➤ 39.77 ppm, s;</li> </ul> <p><i>t</i>Bu<sub>2</sub>PH</p> <ul style="list-style-type: none"> <li>➤ 19.84 ppm, s;</li> </ul>                                                                                                                                                                                                                                                                                                                                                                                                                                                                                                                                                                                                                                                                                       |                                                                                                                                                                                                       |

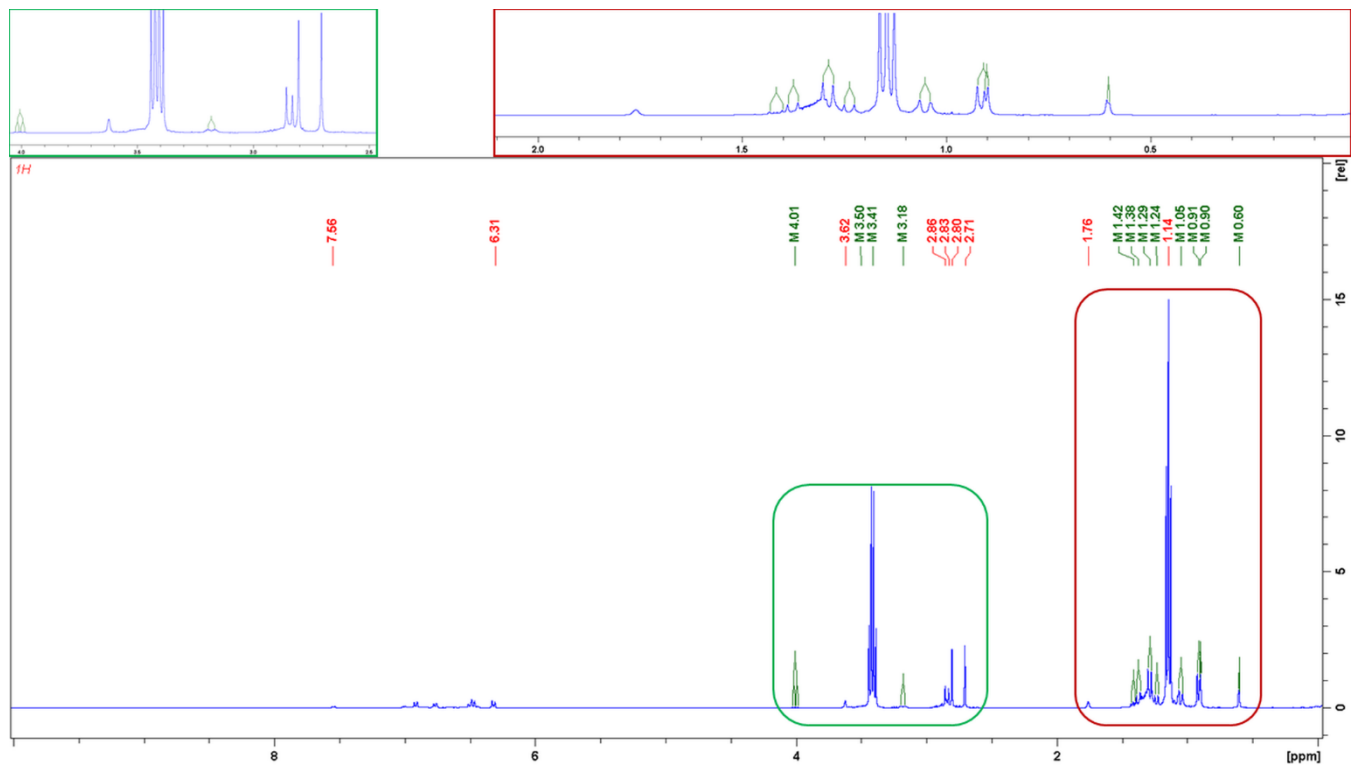

**Figure S41.** <sup>1</sup>H NMR spectrum of reaction mixture of (p-Me<sub>2</sub>N-C<sub>6</sub>H<sub>4</sub>)(H)C=P-PtBu<sub>2</sub> (**4**) with MeLi in THF-d<sub>8</sub>.



**Table S23.** Description of signals observed on the  $^1\text{H}$  NMR spectrum of reaction mixture of  $(p\text{-Me}_2\text{N-C}_6\text{H}_4)(\text{H})\text{C}=\text{P}-\text{P}t\text{Bu}_2$  (**4**) with  $n\text{BuLi}$  in  $\text{THF-d}_8$  – **Figure S41**.

|                                                                                                                                                                                                                                                                                                                                                                                                                                                                                                                                                                                                                                                                                                                                                                                                                                                                                                                                                                                                                                                                                                                                                                                                                                                                                                                                                                                                                                                                                                                                                                                                                                                                                                                                                                       |                                                                                                                                                                                          |
|-----------------------------------------------------------------------------------------------------------------------------------------------------------------------------------------------------------------------------------------------------------------------------------------------------------------------------------------------------------------------------------------------------------------------------------------------------------------------------------------------------------------------------------------------------------------------------------------------------------------------------------------------------------------------------------------------------------------------------------------------------------------------------------------------------------------------------------------------------------------------------------------------------------------------------------------------------------------------------------------------------------------------------------------------------------------------------------------------------------------------------------------------------------------------------------------------------------------------------------------------------------------------------------------------------------------------------------------------------------------------------------------------------------------------------------------------------------------------------------------------------------------------------------------------------------------------------------------------------------------------------------------------------------------------------------------------------------------------------------------------------------------------|------------------------------------------------------------------------------------------------------------------------------------------------------------------------------------------|
| <p>➤ from 7.56 ppm to 6.31 ppm - aromatic protons;</p>                                                                                                                                                                                                                                                                                                                                                                                                                                                                                                                                                                                                                                                                                                                                                                                                                                                                                                                                                                                                                                                                                                                                                                                                                                                                                                                                                                                                                                                                                                                                                                                                                                                                                                                |                                                                                                                                                                                          |
| 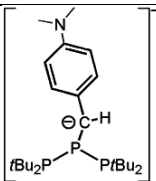                                                                                                                                                                                                                                                                                                                                                                                                                                                                                                                                                                                                                                                                                                                                                                                                                                                                                                                                                                                                                                                                                                                                                                                                                                                                                                                                                                                                                                                                                                                                                                                                                                                                                     | <p><math>[\text{tBu}_2\text{P}-\text{P}-\{\text{C}(\text{H})(p\text{-Me}_2\text{N-C}_6\text{H}_4)\}-\text{P}t\text{Bu}_2]^-</math><br/>(<b>2_4</b>)</p>                                  |
| <p>➤ 4.01 ppm, dd, <math>J_{\text{PH}} = 9.5</math> Hz, <math>J_{\text{HH}} = 6.4</math> Hz <math>[\text{tBu}_2\text{P}-\text{P}-\{\text{C}(\text{H})(p\text{-Me}_2\text{N-C}_6\text{H}_4)\}-\text{P}t\text{Bu}_2]^-</math>;</p> <p>➤ 2.86 ppm, s, <math>[\text{tBu}_2\text{P}-\text{P}-\{\text{C}(\text{H})(p\text{-Me}_2\text{N-C}_6\text{H}_4)\}-\text{P}t\text{Bu}_2]^-</math>;</p> <p>➤ 2.83 ppm, s, <math>[\text{tBu}_2\text{P}-\text{P}-\{\text{C}(\text{H})(p\text{-Me}_2\text{N-C}_6\text{H}_4)\}-\text{P}t\text{Bu}_2]^-</math>;</p> <p>➤ 1.38 ppm, d, <math>J_{\text{PH}} = 9.9</math> Hz, <math>[\text{tBu}_2\text{P}-\text{P}-\{\text{C}(\text{H})(p\text{-Me}_2\text{N-C}_6\text{H}_4)\}-\text{P}t\text{Bu}_2]^-</math>;</p> <p>➤ 1.24 ppm, d, <math>J_{\text{PH}} = 9.8</math> Hz, <math>[\text{tBu}_2\text{P}-\text{P}-\{\text{C}(\text{H})(p\text{-Me}_2\text{N-C}_6\text{H}_4)\}-\text{P}t\text{Bu}_2]^-</math>;</p>                                                                                                                                                                                                                                                                                                                                                                                                                                                                                                                                                                                                                                                                                                                                                                                                                                |                                                                                                                                                                                          |
|                                                                                                                                                                                                                                                                                                                                                                                                                                                                                                                                                                                                                                                                                                                                                                                                                                                                                                                                                                                                                                                                                                                                                                                                                                                                                                                                                                                                                                                                                                                                                                                                                                                                                      | <p><math>[\text{P}(\text{Me})_2-\text{CH}(p\text{-Me}_2\text{N-C}_6\text{H}_4)-\text{CH}(p\text{-Me}_2\text{N-C}_6\text{H}_4)-\text{P}(\text{P}t\text{Bu}_2)]^-</math> (<b>4a''</b>)</p> |
| <p>➤ 3.50 ppm, broad m, <math>[\text{P}(\text{Me})_2-\text{CH}(p\text{-Me}_2\text{N-C}_6\text{H}_4)-\text{CH}(p\text{-Me}_2\text{N-C}_6\text{H}_4)-\text{P}(\text{P}t\text{Bu}_2)]^-</math>;</p> <p>➤ 3.18 ppm, broad d, <math>J_{\text{PH}} = 11.6</math> Hz, <math>[\text{P}(\text{Me})_2-\text{CH}(p\text{-Me}_2\text{N-C}_6\text{H}_4)-\text{CH}(p\text{-Me}_2\text{N-C}_6\text{H}_4)-\text{P}(\text{P}t\text{Bu}_2)]^-</math>;</p> <p>➤ 2.80 ppm, s, <math>[\text{P}(\text{Me})_2-\text{CH}(p\text{-Me}_2\text{N-C}_6\text{H}_4)-\text{CH}(p\text{-Me}_2\text{N-C}_6\text{H}_4)-\text{P}(\text{P}t\text{Bu}_2)]^-</math>;</p> <p>➤ 2.71 ppm, s, <math>[\text{P}(\text{Me})_2-\text{CH}(p\text{-Me}_2\text{N-C}_6\text{H}_4)-\text{CH}(p\text{-Me}_2\text{N-C}_6\text{H}_4)-\text{P}(\text{P}t\text{Bu}_2)]^-</math>;</p> <p>➤ 1.29 ppm, broad d, <math>J_{\text{PH}} = 11.3</math> Hz, <math>[\text{P}(\text{Me})_2-\text{CH}(p\text{-Me}_2\text{N-C}_6\text{H}_4)-\text{CH}(p\text{-Me}_2\text{N-C}_6\text{H}_4)-\text{P}(\text{P}t\text{Bu}_2)]^-</math>;</p> <p>➤ 0.91 ppm, d, <math>J_{\text{PH}} = 10.3</math> Hz, <math>[\text{P}(\text{Me})_2-\text{CH}(p\text{-Me}_2\text{N-C}_6\text{H}_4)-\text{CH}(p\text{-Me}_2\text{N-C}_6\text{H}_4)-\text{P}(\text{P}t\text{Bu}_2)]^-</math>;</p> <p>➤ 0.90 ppm, d, <math>J_{\text{PH}} = 3.0</math> Hz, <math>[\text{P}(\text{Me})_2-\text{CH}(p\text{-Me}_2\text{N-C}_6\text{H}_4)-\text{CH}(p\text{-Me}_2\text{N-C}_6\text{H}_4)-\text{P}(\text{P}t\text{Bu}_2)]^-</math>;</p> <p>➤ 0.60 ppm, d, <math>J_{\text{PH}} = 2.3</math> Hz, <math>[\text{P}(\text{Me})_2-\text{CH}(p\text{-Me}_2\text{N-C}_6\text{H}_4)-\text{CH}(p\text{-Me}_2\text{N-C}_6\text{H}_4)-\text{P}(\text{P}t\text{Bu}_2)]^-</math>;</p> |                                                                                                                                                                                          |
| <p><math>t\text{Bu}_2\text{PLi}</math></p> <p>➤ 1.42 ppm, d, <math>J_{\text{PH}} = 11.7</math> Hz;</p> <p><math>t\text{Bu}_2\text{PH}</math></p> <p>➤ 1.05 ppm, d, <math>J_{\text{PH}} = 10.0</math> Hz;</p> <p>Another signals</p> <p>➤ 3.41 ppm and 1.14 ppm, <math>\text{Et}_2\text{O}</math> protons from the 1.6 M solution of <math>\text{MeLi}</math> in <math>\text{Et}_2\text{O}</math>;</p> <p>➤ 3.62 ppm and 1.76 ppm, <math>\text{THF-d}_8</math>;</p>                                                                                                                                                                                                                                                                                                                                                                                                                                                                                                                                                                                                                                                                                                                                                                                                                                                                                                                                                                                                                                                                                                                                                                                                                                                                                                    |                                                                                                                                                                                          |

b) with *n*BuLi

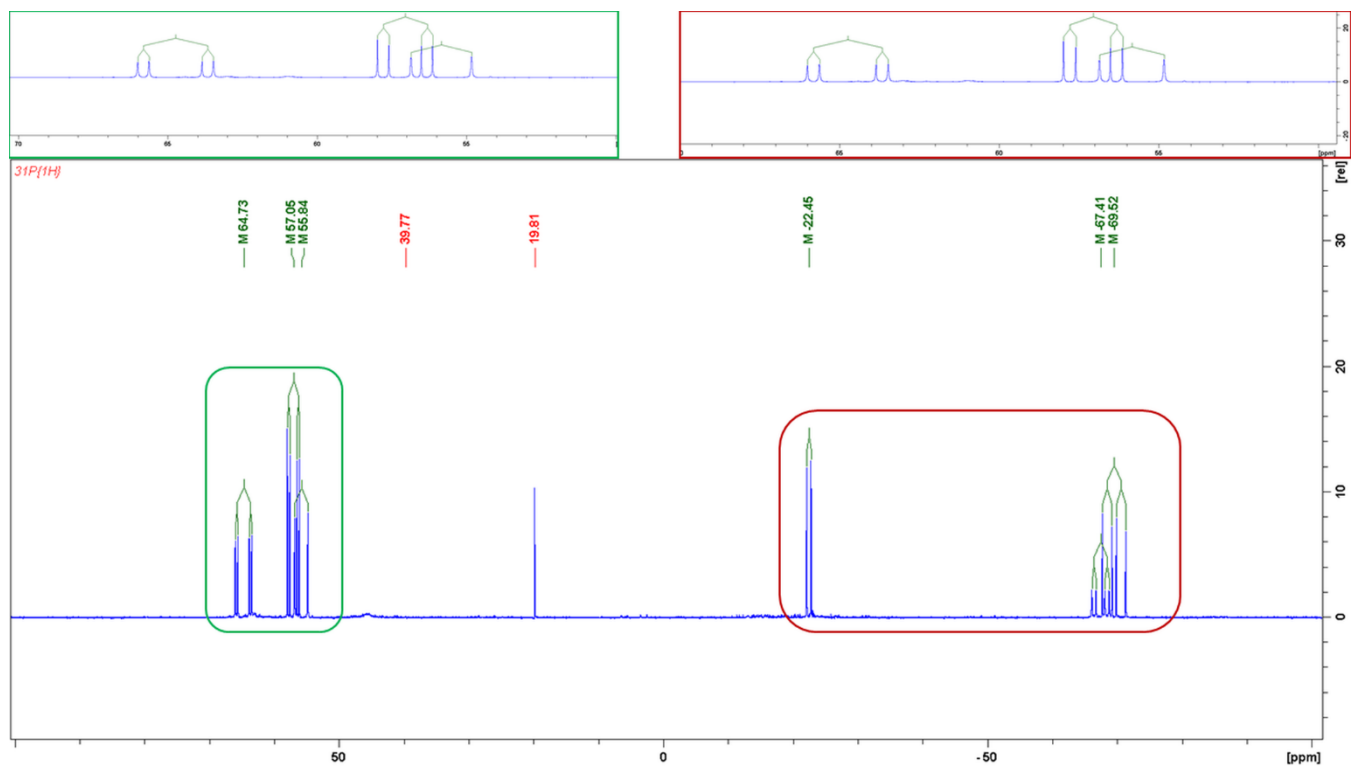

Figure S42.  $^{31}\text{P}\{^1\text{H}\}$  NMR spectrum of reaction mixture of  $(p\text{-Me}_2\text{N-C}_6\text{H}_4)(\text{H})\text{C}=\text{P}-\text{P}t\text{Bu}_2$  (**4**) with *n*BuLi in THF- $\text{d}_8$ .

**Table S24.** Description of signals observed on the  $^{31}\text{P}\{^1\text{H}\}$  NMR spectrum of reaction mixture of (*p*-Me<sub>2</sub>N-C<sub>6</sub>H<sub>4</sub>)(H)C=P-*Pt*Bu<sub>2</sub> (**4**) with *n*BuLi in THF-d<sub>8</sub> – **Figure S42**.

|                                                                                                                                                                                                                                                                                                                                                                                                                                                                                                                                                                                                                                                                                                                                                                                                                                                                                                                           |                                                                                                                                                                                                                   |
|---------------------------------------------------------------------------------------------------------------------------------------------------------------------------------------------------------------------------------------------------------------------------------------------------------------------------------------------------------------------------------------------------------------------------------------------------------------------------------------------------------------------------------------------------------------------------------------------------------------------------------------------------------------------------------------------------------------------------------------------------------------------------------------------------------------------------------------------------------------------------------------------------------------------------|-------------------------------------------------------------------------------------------------------------------------------------------------------------------------------------------------------------------|
|                                                                                                                                                                                                                                                                                                                                                                                                                                                                                                                                                                                                                                                                                                                                                                                                                                                                                                                           | $[\textit{t}\text{Bu}_2\text{P}-\text{P}-\{\text{C}(\text{H})(\textit{p}\text{-Me}_2\text{N-C}_6\text{H}_4)\}-\text{P}\textit{t}\text{Bu}_2]^-$<br><b>(2_4)</b>                                                   |
| <ul style="list-style-type: none"> <li>➤ 64.73 ppm, dd, <math>J_{\text{PP}} = 348.2</math> Hz, <math>J_{\text{PP}} = 62.6</math> Hz, <math>[\textit{t}\text{Bu}_2\text{P}-\text{P}-\{\text{C}(\text{H})(\textit{p}\text{-Me}_2\text{N-C}_6\text{H}_4)\}-\text{P}\textit{t}\text{Bu}_2]^-</math>;</li> <li>➤ 57.05 ppm, dd, <math>J_{\text{PP}} = 237.7</math> Hz, <math>J_{\text{PP}} = 62.6</math> Hz, <math>[\textit{t}\text{Bu}_2\text{P}-\text{P}-\{\text{C}(\text{H})(\textit{p}\text{-Me}_2\text{N-C}_6\text{H}_4)\}-\text{P}\textit{t}\text{Bu}_2]^-</math>;</li> <li>➤ -69.52 ppm, dd, <math>J_{\text{PP}} = 348.2</math> Hz, <math>J_{\text{PP}} = 237.7</math> Hz, <math>[[\textit{t}\text{Bu}_2\text{P}-\text{P}-\{\text{C}(\text{H})(\textit{p}\text{-Me}_2\text{N-C}_6\text{H}_4)\}-\text{P}\textit{t}\text{Bu}_2]^-]</math>;</li> </ul>                                                                     |                                                                                                                                                                                                                   |
|                                                                                                                                                                                                                                                                                                                                                                                                                                                                                                                                                                                                                                                                                                                                                                                                                                                                                                                           | $[\text{P}(\textit{n}\text{Bu})_2-\text{CH}(\textit{p}\text{-Me}_2\text{N-C}_6\text{H}_4)-\text{CH}(\textit{p}\text{-Me}_2\text{N-C}_6\text{H}_4)-\text{P}-(\textit{P}\textit{t}\text{Bu}_2)]^-$<br><b>(4b'')</b> |
| <ul style="list-style-type: none"> <li>➤ 54.84 ppm, d, <math>J_{\text{PP}} = 328.6</math> Hz, <math>[\text{P}(\textit{n}\text{Bu})_2-\text{CH}(\textit{p}\text{-Me}_2\text{N-C}_6\text{H}_4)-\text{CH}(\textit{p}\text{-Me}_2\text{N-C}_6\text{H}_4)-\text{P}-(\textit{P}\textit{t}\text{Bu}_2)]^-</math>;</li> <li>➤ -22.45 ppm, d, <math>J_{\text{PP}} = 109.6</math> Hz, <math>[\text{P}(\textit{n}\text{Bu})_2-\text{CH}(\textit{p}\text{-Me}_2\text{N-C}_6\text{H}_4)-\text{CH}(\textit{p}\text{-Me}_2\text{N-C}_6\text{H}_4)-\text{P}-(\textit{P}\textit{t}\text{Bu}_2)]^-</math>;</li> <li>➤ -67.41 ppm, dd, <math>J_{\text{PP}} = 328.6</math> Hz, <math>J_{\text{PP}} = 109.6</math> Hz, <math>[\text{P}(\textit{n}\text{Bu})_2-\text{CH}(\textit{p}\text{-Me}_2\text{N-C}_6\text{H}_4)-\text{CH}(\textit{p}\text{-Me}_2\text{N-C}_6\text{H}_4)-\text{P}-(\textit{P}\textit{t}\text{Bu}_2)]^-</math>;</li> </ul> |                                                                                                                                                                                                                   |
| <i>t</i> Bu <sub>2</sub> PLi                                                                                                                                                                                                                                                                                                                                                                                                                                                                                                                                                                                                                                                                                                                                                                                                                                                                                              |                                                                                                                                                                                                                   |
| <ul style="list-style-type: none"> <li>➤ 39.77 ppm, s;</li> </ul>                                                                                                                                                                                                                                                                                                                                                                                                                                                                                                                                                                                                                                                                                                                                                                                                                                                         |                                                                                                                                                                                                                   |
| <i>t</i> Bu <sub>2</sub> PH                                                                                                                                                                                                                                                                                                                                                                                                                                                                                                                                                                                                                                                                                                                                                                                                                                                                                               |                                                                                                                                                                                                                   |
| <ul style="list-style-type: none"> <li>➤ 19.81 ppm, s;</li> </ul>                                                                                                                                                                                                                                                                                                                                                                                                                                                                                                                                                                                                                                                                                                                                                                                                                                                         |                                                                                                                                                                                                                   |

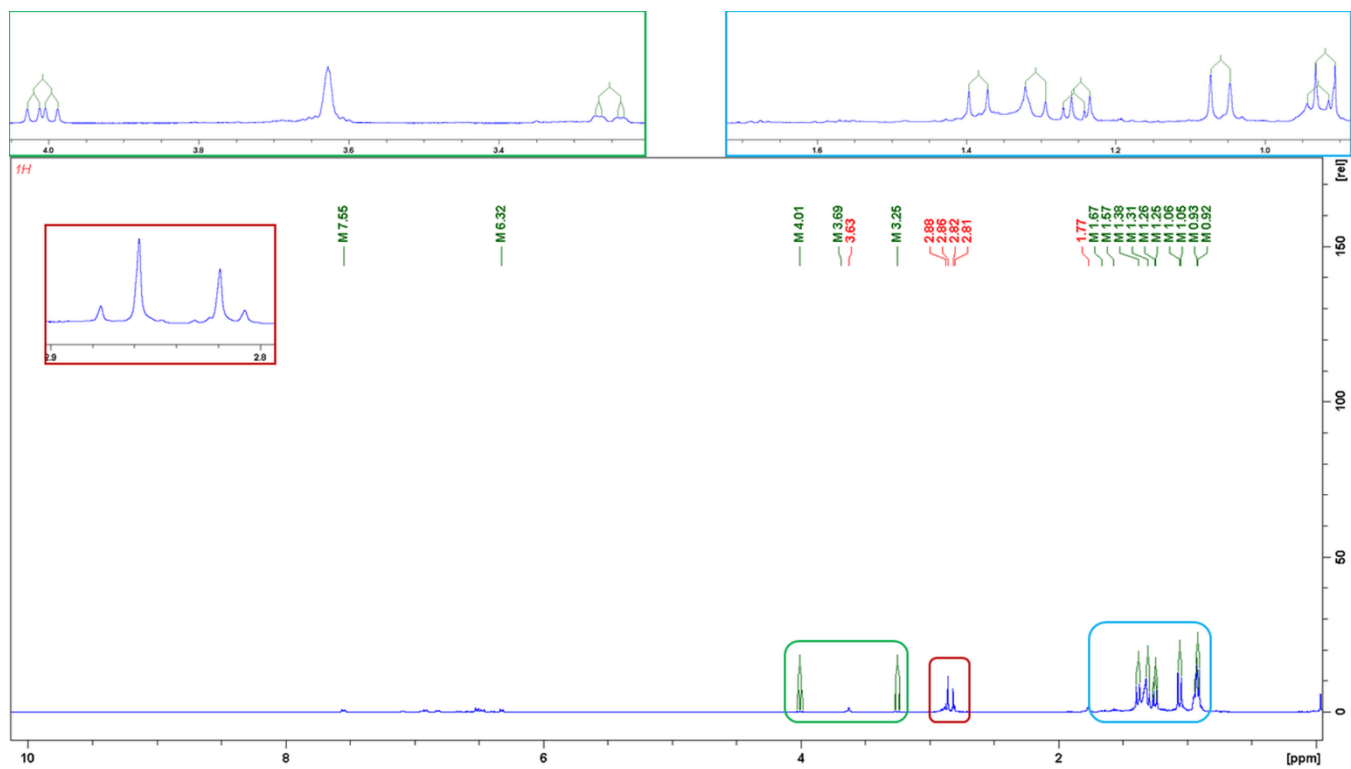

**Figure S43.** <sup>1</sup>H NMR spectrum of reaction mixture of (p-Me<sub>2</sub>N-C<sub>6</sub>H<sub>4</sub>)(H)C=P-PtBu<sub>2</sub> (**4**) with nBuLi in THF-d<sub>8</sub>.

**Table S25.** Description of signals observed on the  $^1\text{H}$  NMR spectrum of reaction mixture of (*p*-Me<sub>2</sub>N-C<sub>6</sub>H<sub>4</sub>)(H)C=P-*Pt*Bu<sub>2</sub> (**4**) with *n*BuLi in THF-d<sub>8</sub> – **Figure S43**.

|                                                                                                                                                                                                                                                                                                                                                                                                                                                                                                                                                                                                                                                                                                                                                                                                                                                                                                                                                                                                                                                                                                                                                                                                                                                                                                                                                                                                                                                                                                                                                                                                                                                                                                                                                                                                                                                                                                                                                                                                                                                                                                                                                                                                                                       |                                                                                                                                                                             |
|---------------------------------------------------------------------------------------------------------------------------------------------------------------------------------------------------------------------------------------------------------------------------------------------------------------------------------------------------------------------------------------------------------------------------------------------------------------------------------------------------------------------------------------------------------------------------------------------------------------------------------------------------------------------------------------------------------------------------------------------------------------------------------------------------------------------------------------------------------------------------------------------------------------------------------------------------------------------------------------------------------------------------------------------------------------------------------------------------------------------------------------------------------------------------------------------------------------------------------------------------------------------------------------------------------------------------------------------------------------------------------------------------------------------------------------------------------------------------------------------------------------------------------------------------------------------------------------------------------------------------------------------------------------------------------------------------------------------------------------------------------------------------------------------------------------------------------------------------------------------------------------------------------------------------------------------------------------------------------------------------------------------------------------------------------------------------------------------------------------------------------------------------------------------------------------------------------------------------------------|-----------------------------------------------------------------------------------------------------------------------------------------------------------------------------|
| 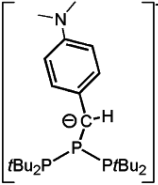                                                                                                                                                                                                                                                                                                                                                                                                                                                                                                                                                                                                                                                                                                                                                                                                                                                                                                                                                                                                                                                                                                                                                                                                                                                                                                                                                                                                                                                                                                                                                                                                                                                                                                                                                                                                                                                                                                                                                                                                                                                                                                                                                     | $[\text{tBu}_2\text{P}-\text{P}-\{\text{C}(\text{H})(p\text{-Me}_2\text{N-C}_6\text{H}_4)\}-\text{P}t\text{Bu}_2]^-$<br><b>(2_4)</b>                                        |
| <ul style="list-style-type: none"> <li>➤ 4.01 ppm, dd, <math>J_{\text{PH}} = 9.6</math> Hz, <math>J_{\text{HH}} = 6.5</math> Hz [<math>\text{tBu}_2\text{P}-\text{P}-\{\text{C}(\text{H})(p\text{-Me}_2\text{N-C}_6\text{H}_4)\}-\text{P}t\text{Bu}_2]^-</math>;</li> <li>➤ 2.86 ppm, s, [<math>\text{tBu}_2\text{P}-\text{P}-\{\text{C}(\text{H})(p\text{-Me}_2\text{N-C}_6\text{H}_4)\}-\text{P}t\text{Bu}_2]^-</math>;</li> <li>➤ 2.82 ppm, s, [<math>\text{tBu}_2\text{P}-\text{P}-\{\text{C}(\text{H})(p\text{-Me}_2\text{N-C}_6\text{H}_4)\}-\text{P}t\text{Bu}_2]^-</math>;</li> <li>➤ 1.38 ppm, d, <math>J_{\text{PH}} = 10.0</math> Hz, [<math>\text{tBu}_2\text{P}-\text{P}-\{\text{C}(\text{H})(p\text{-Me}_2\text{N-C}_6\text{H}_4)\}-\text{P}t\text{Bu}_2]^-</math>;</li> <li>➤ 1.25 ppm, d, <math>J_{\text{PH}} = 9.8</math> Hz, [<math>\text{tBu}_2\text{P}-\text{P}-\{\text{C}(\text{H})(p\text{-Me}_2\text{N-C}_6\text{H}_4)\}-\text{P}t\text{Bu}_2]^-</math>;</li> <li>➤ 1.06 ppm, d, <math>J_{\text{PH}} = 10.4</math> Hz, [<math>\text{tBu}_2\text{P}-\text{P}-\{\text{C}(\text{H})(p\text{-Me}_2\text{N-C}_6\text{H}_4)\}-\text{P}t\text{Bu}_2]^-</math>;</li> <li>➤ 0.92 ppm, d, <math>J_{\text{PH}} = 10.5</math> Hz, [<math>\text{tBu}_2\text{P}-\text{P}-\{\text{C}(\text{H})(p\text{-Me}_2\text{N-C}_6\text{H}_4)\}-\text{P}t\text{Bu}_2]^-</math></li> </ul>                                                                                                                                                                                                                                                                                                                                                                                                                                                                                                                                                                                                                                                                                                                                                                                                                                               |                                                                                                                                                                             |
|                                                                                                                                                                                                                                                                                                                                                                                                                                                                                                                                                                                                                                                                                                                                                                                                                                                                                                                                                                                                                                                                                                                                                                                                                                                                                                                                                                                                                                                                                                                                                                                                                                                                                                                                                                                                                                                                                                                                                                                                                                                                                                                                                      | $[\text{P}(n\text{Bu})_2-\text{CH}(p\text{-Me}_2\text{N-C}_6\text{H}_4)-\text{CH}(p\text{-Me}_2\text{N-C}_6\text{H}_4)-\text{P}-(\text{P}t\text{Bu}_2)]^-$<br><b>(3b'')</b> |
| <ul style="list-style-type: none"> <li>➤ 3.69 ppm, broad m, [<math>\text{P}(n\text{Bu})_2-\text{CH}(p\text{-Me}_2\text{N-C}_6\text{H}_4)-\text{CH}(p\text{-Me}_2\text{N-C}_6\text{H}_4)-\text{P}-(\text{P}t\text{Bu}_2)]^-</math>;</li> <li>➤ 3.25 ppm, broad dd, <math>J_{\text{PH}} = 11.8</math> Hz, <math>J_{\text{HH}} = 3.1</math> Hz [<math>\text{P}(n\text{Bu})_2-\text{CH}(p\text{-Me}_2\text{N-C}_6\text{H}_4)-\text{CH}(p\text{-Me}_2\text{N-C}_6\text{H}_4)-\text{P}-(\text{P}t\text{Bu}_2)]^-</math>;</li> <li>➤ 2.88 ppm, s, [<math>\text{P}(n\text{Bu})_2-\text{CH}(p\text{-Me}_2\text{N-C}_6\text{H}_4)-\text{CH}(p\text{-Me}_2\text{N-C}_6\text{H}_4)-\text{P}-(\text{P}t\text{Bu}_2)]^-</math>;</li> <li>➤ 2.81 ppm, s, [<math>\text{P}(n\text{Bu})_2-\text{CH}(p\text{-Me}_2\text{N-C}_6\text{H}_4)-\text{CH}(p\text{-Me}_2\text{N-C}_6\text{H}_4)-\text{P}-(\text{P}t\text{Bu}_2)]^-</math>;</li> <li>➤ 1.67 ppm, broad m, [<math>\text{P}(n\text{Bu})_2-\text{CH}(p\text{-Me}_2\text{N-C}_6\text{H}_4)-\text{CH}(p\text{-Me}_2\text{N-C}_6\text{H}_4)-\text{P}-(\text{P}t\text{Bu}_2)]^-</math>;</li> <li>➤ 1.57 ppm, broad m, [<math>\text{P}(n\text{Bu})_2-\text{CH}(p\text{-Me}_2\text{N-C}_6\text{H}_4)-\text{CH}(p\text{-Me}_2\text{N-C}_6\text{H}_4)-\text{P}-(\text{P}t\text{Bu}_2)]^-</math>;</li> <li>➤ 1.31 ppm, broad d, <math>J_{\text{PH}} = 10.8</math> Hz, [<math>\text{P}(n\text{Bu})_2-\text{CH}(p\text{-Me}_2\text{N-C}_6\text{H}_4)-\text{CH}(p\text{-Me}_2\text{N-C}_6\text{H}_4)-\text{P}-(\text{P}t\text{Bu}_2)]^-</math>;</li> <li>➤ 1.26 ppm, broad d, <math>J_{\text{PH}} = 11.2</math> Hz, [<math>\text{P}(n\text{Bu})_2-\text{CH}(p\text{-Me}_2\text{N-C}_6\text{H}_4)-\text{CH}(p\text{-Me}_2\text{N-C}_6\text{H}_4)-\text{P}-(\text{P}t\text{Bu}_2)]^-</math>;</li> <li>➤ 1.05 ppm, broad m, [<math>\text{P}(n\text{Bu})_2-\text{CH}(p\text{-Me}_2\text{N-C}_6\text{H}_4)-\text{CH}(p\text{-Me}_2\text{N-C}_6\text{H}_4)-\text{P}-(\text{P}t\text{Bu}_2)]^-</math>;</li> <li>➤ 0.92 ppm, broad m, [<math>\text{P}(n\text{Bu})_2-\text{CH}(p\text{-Me}_2\text{N-C}_6\text{H}_4)-\text{CH}(p\text{-Me}_2\text{N-C}_6\text{H}_4)-\text{P}-(\text{P}t\text{Bu}_2)]^-</math>;</li> </ul> |                                                                                                                                                                             |
| <p>Another signals</p>                                                                                                                                                                                                                                                                                                                                                                                                                                                                                                                                                                                                                                                                                                                                                                                                                                                                                                                                                                                                                                                                                                                                                                                                                                                                                                                                                                                                                                                                                                                                                                                                                                                                                                                                                                                                                                                                                                                                                                                                                                                                                                                                                                                                                |                                                                                                                                                                             |
| <ul style="list-style-type: none"> <li>➤ 3.63 ppm and 1.77 ppm THF-d<sub>8</sub>;</li> </ul>                                                                                                                                                                                                                                                                                                                                                                                                                                                                                                                                                                                                                                                                                                                                                                                                                                                                                                                                                                                                                                                                                                                                                                                                                                                                                                                                                                                                                                                                                                                                                                                                                                                                                                                                                                                                                                                                                                                                                                                                                                                                                                                                          |                                                                                                                                                                             |

c) with *t*BuLi

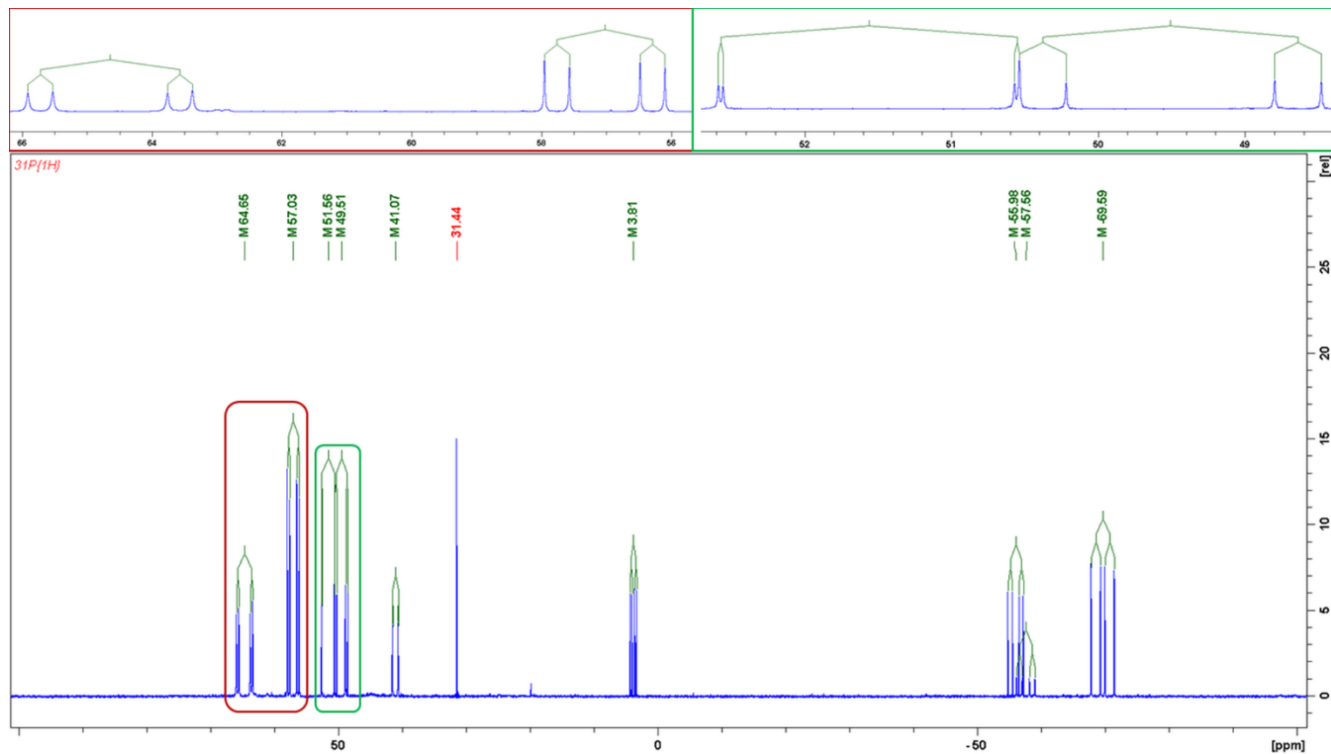

Figure S44.  $^{31}\text{P}\{^1\text{H}\}$  NMR spectrum of reaction mixture of (*p*-Me<sub>2</sub>N-C<sub>6</sub>H<sub>4</sub>)(H)C=P-*t*Bu<sub>2</sub> (**4**) with *t*BuLi in THF-d<sub>8</sub>.

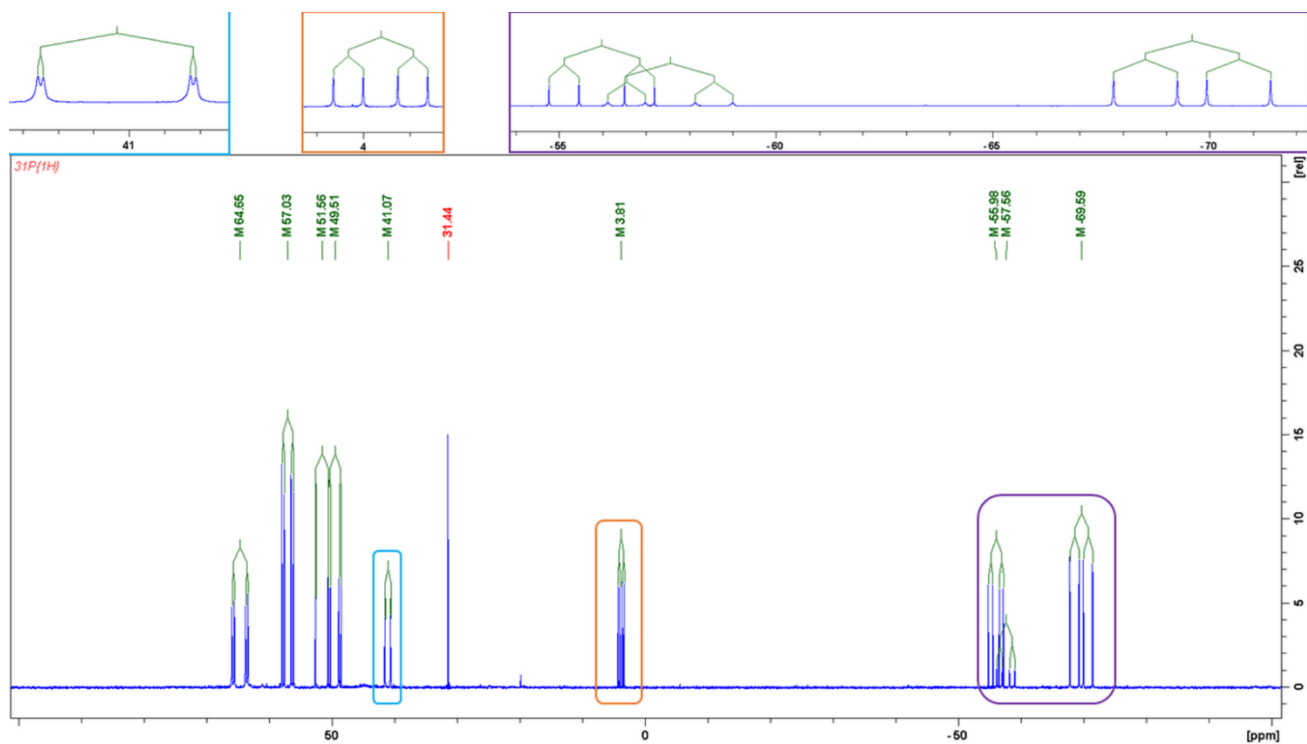

Figure S45.  $^{31}\text{P}\{^1\text{H}\}$  NMR spectrum of reaction mixture of (*p*-Me<sub>2</sub>N-C<sub>6</sub>H<sub>4</sub>)(H)C=P-*t*Bu<sub>2</sub> (**4**) with *t*BuLi in THF-d<sub>8</sub>.

**Table S26.** Description of signals observed on the  $^{31}\text{P}\{^1\text{H}\}$  NMR spectrum of reaction mixture of (*p*-Me<sub>2</sub>N-C<sub>6</sub>H<sub>4</sub>)(H)C=P-*Pt*Bu<sub>2</sub> (**4**) with *n*BuLi in THF-*d*<sub>8</sub> – **Figure S44** and **S45**.

|                                                                                                                                                                                                                                                                                                                                                                                                                                                                                                                                                                                                                                                                                                                                                                                                                                                                                                                                                                                                                                                                                                                                                                                                                                                                                                                                                                                                                                                                                                                                                                                                                                                                                                                                                                                                                   |                                                                                                                                                                                         |
|-------------------------------------------------------------------------------------------------------------------------------------------------------------------------------------------------------------------------------------------------------------------------------------------------------------------------------------------------------------------------------------------------------------------------------------------------------------------------------------------------------------------------------------------------------------------------------------------------------------------------------------------------------------------------------------------------------------------------------------------------------------------------------------------------------------------------------------------------------------------------------------------------------------------------------------------------------------------------------------------------------------------------------------------------------------------------------------------------------------------------------------------------------------------------------------------------------------------------------------------------------------------------------------------------------------------------------------------------------------------------------------------------------------------------------------------------------------------------------------------------------------------------------------------------------------------------------------------------------------------------------------------------------------------------------------------------------------------------------------------------------------------------------------------------------------------|-----------------------------------------------------------------------------------------------------------------------------------------------------------------------------------------|
|                                                                                                                                                                                                                                                                                                                                                                                                                                                                                                                                                                                                                                                                                                                                                                                                                                                                                                                                                                                                                                                                                                                                                                                                                                                                                                                                                                                                                                                                                                                                                                                                                                                                                                                                                                                                                   | $[\text{tBu}_2\text{P}-\text{P}-\{\text{C}(\text{H})(p\text{-Me}_2\text{N-C}_6\text{H}_4)\}-\text{P}t\text{Bu}_2]^+$<br><b>(2_4)</b>                                                    |
| <ul style="list-style-type: none"> <li>➤ 64.65 ppm, dd, <math>J_{\text{PP}} = 348.2</math> Hz, <math>J_{\text{PP}} = 62.6</math> Hz,</li> <li>➤ 57.03 ppm, dd, <math>J_{\text{PP}} = 237.7</math> Hz, <math>J_{\text{PP}} = 62.6</math> Hz, <math>[\text{tBu}_2\text{P}-\text{P}-\{\text{C}(\text{H})(p\text{-Me}_2\text{N-C}_6\text{H}_4)\}-\text{P}t\text{Bu}_2]^+</math>;</li> <li>➤ -69.59 ppm, dd, <math>J_{\text{PP}} = 348.2</math> Hz, <math>J_{\text{PP}} = 237.7</math> Hz, <math>[\text{tBu}_2\text{P}-\text{P}-\{\text{C}(\text{H})(p\text{-Me}_2\text{N-C}_6\text{H}_4)\}-\text{P}t\text{Bu}_2]^+</math>;</li> </ul>                                                                                                                                                                                                                                                                                                                                                                                                                                                                                                                                                                                                                                                                                                                                                                                                                                                                                                                                                                                                                                                                                                                                                                                 |                                                                                                                                                                                         |
|                                                                                                                                                                                                                                                                                                                                                                                                                                                                                                                                                                                                                                                                                                                                                                                                                                                                                                                                                                                                                                                                                                                                                                                                                                                                                                                                                                                                                                                                                                                                                                                                                                                                                                                                                                                                                   | $[\{\text{P}(t\text{Bu})_2-\text{CH}(p\text{-Me}_2\text{N-C}_6\text{H}_4)-\text{CH}(p\text{-Me}_2\text{N-C}_6\text{H}_4)-\text{P}(\text{P}t\text{Bu}_2)\}_2\text{Li}]^+$ ( <b>4c*</b> ) |
| <ul style="list-style-type: none"> <li>➤ 51.56 ppm, dd, <math>J_{\text{PP}} = 326.9</math> Hz, <math>J_{\text{PP}} = 5.3</math> Hz, <math>[\{\text{P}(t\text{Bu})_2-\text{CH}(p\text{-Me}_2\text{N-C}_6\text{H}_4)-\text{CH}(p\text{-Me}_2\text{N-C}_6\text{H}_4)-\text{P}(\text{P}t\text{Bu}_2)\}_2\text{Li}]^+</math>;</li> <li>➤ 49.51 ppm, dd, <math>J_{\text{PP}} = 281.7</math> Hz, <math>J_{\text{PP}} = 51.5</math> Hz, <math>[\{\text{P}(t\text{Bu})_2-\text{CH}(p\text{-Me}_2\text{N-C}_6\text{H}_4)-\text{CH}(p\text{-Me}_2\text{N-C}_6\text{H}_4)-\text{P}(\text{P}t\text{Bu}_2)\}_2\text{Li}]^+</math>;</li> <li>➤ 41.07 ppm, dd, <math>J_{\text{PP}} = 139.5</math> Hz, <math>J_{\text{PP}} = 5.3</math> Hz, <math>[\{\text{P}(t\text{Bu})_2-\text{CH}(p\text{-Me}_2\text{N-C}_6\text{H}_4)-\text{CH}(p\text{-Me}_2\text{N-C}_6\text{H}_4)-\text{P}(\text{P}t\text{Bu}_2)\}_2\text{Li}]^+</math>;</li> <li>➤ 3.81 ppm, dd, <math>J_{\text{PP}} = 111.3</math> Hz, <math>J_{\text{PP}} = 51.5</math> Hz, <math>[\{\text{P}(t\text{Bu})_2-\text{CH}(p\text{-Me}_2\text{N-C}_6\text{H}_4)-\text{CH}(p\text{-Me}_2\text{N-C}_6\text{H}_4)-\text{P}(\text{P}t\text{Bu}_2)\}_2\text{Li}]^+</math>;</li> <li>➤ -55.98 ppm, dd, <math>J_{\text{PP}} = 281.7</math> Hz, <math>J_{\text{PP}} = 111.3</math> Hz, <math>[\{\text{P}(t\text{Bu})_2-\text{CH}(p\text{-Me}_2\text{N-C}_6\text{H}_4)-\text{CH}(p\text{-Me}_2\text{N-C}_6\text{H}_4)-\text{P}(\text{P}t\text{Bu}_2)\}_2\text{Li}]^+</math>;</li> <li>➤ -57.56 ppm, dd, <math>J_{\text{PP}} = 326.9</math> Hz, <math>J_{\text{PP}} = 139.5</math> Hz, <math>[\{\text{P}(t\text{Bu})_2-\text{CH}(p\text{-Me}_2\text{N-C}_6\text{H}_4)-\text{CH}(p\text{-Me}_2\text{N-C}_6\text{H}_4)-\text{P}(\text{P}t\text{Bu}_2)\}_2\text{Li}]^+</math>;</li> </ul> |                                                                                                                                                                                         |
|                                                                                                                                                                                                                                                                                                                                                                                                                                                                                                                                                                                                                                                                                                                                                                                                                                                                                                                                                                                                                                                                                                                                                                                                                                                                                                                                                                                                                                                                                                                                                                                                                                                                                                                                                                                                                   | $[(p\text{-Me}_2\text{N-C}_6\text{H}_4)(\text{H})\text{C}-\text{P}(t\text{Bu})_2]^+$ ( <b>4c'</b> )                                                                                     |
| <ul style="list-style-type: none"> <li>➤ 31.44 ppm, s, <math>[(p\text{-Me}_2\text{N-C}_6\text{H}_4)(\text{H})\text{C}-\text{P}(t\text{Bu})_2]^+</math>;</li> </ul>                                                                                                                                                                                                                                                                                                                                                                                                                                                                                                                                                                                                                                                                                                                                                                                                                                                                                                                                                                                                                                                                                                                                                                                                                                                                                                                                                                                                                                                                                                                                                                                                                                                |                                                                                                                                                                                         |

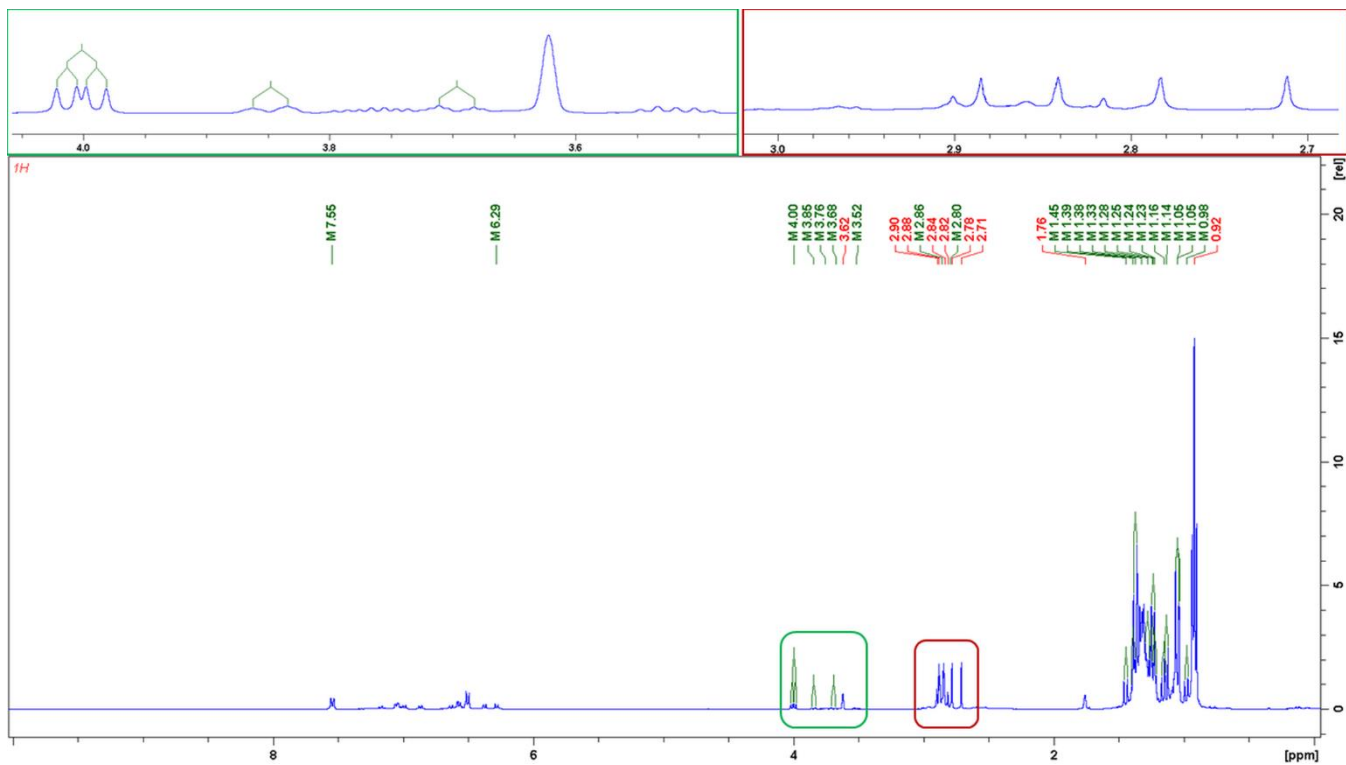

Figure S46. <sup>1</sup>H NMR spectrum of reaction mixture of (p-Me<sub>2</sub>N-C<sub>6</sub>H<sub>4</sub>)(H)C=P-tBu<sub>2</sub> (**4**) with tBuLi in THF-d<sub>8</sub>.

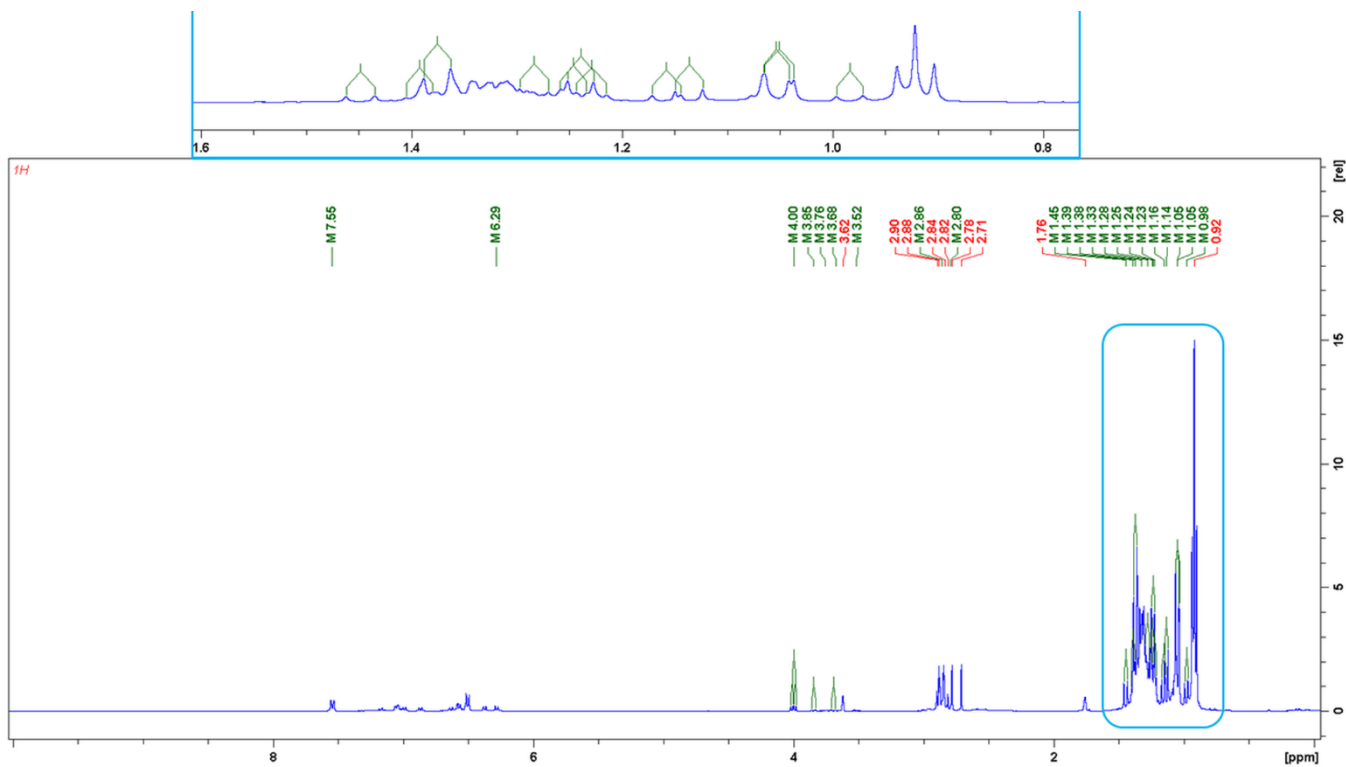

Figure S47. <sup>1</sup>H NMR spectrum of reaction mixture of (p-Me<sub>2</sub>N-C<sub>6</sub>H<sub>4</sub>)(H)C=P-tBu<sub>2</sub> (**4**) with tBuLi in THF-d<sub>8</sub>.



**Table S27.** Description of signals observed on the  $^1\text{H}$  NMR spectrum of reaction mixture of  $(p\text{-Me}_2\text{N-C}_6\text{H}_4)(\text{H})\text{C}=\text{P}-\text{P}t\text{Bu}_2$  (**4**) with  $n\text{BuLi}$  in  $\text{THF-d}_8$  – **Figure S46** and **S47**.

|                                                                                                                                                                                                                                                                                                                                                                                                                                                                                                                                                                                                                                                                                                                                                                                                                                                                                                                                                                                                                                                                                                                                                                                                                                                                                                                                                                                                                                                                                                                                                                                                                                                                                                                                                                                                                                                                                                                                                                                                                                                                                                                                                                                                                                                                                                                                                                                                                                                                                                                                                                                                                                                                                                                                                                                                                                                                                                                                                                                                                                                                                                                                                                                                                                                                                                                                                                                                                                                                                                                                                                                                                                                                                                                               |                                                                                                                                                                                           |
|-------------------------------------------------------------------------------------------------------------------------------------------------------------------------------------------------------------------------------------------------------------------------------------------------------------------------------------------------------------------------------------------------------------------------------------------------------------------------------------------------------------------------------------------------------------------------------------------------------------------------------------------------------------------------------------------------------------------------------------------------------------------------------------------------------------------------------------------------------------------------------------------------------------------------------------------------------------------------------------------------------------------------------------------------------------------------------------------------------------------------------------------------------------------------------------------------------------------------------------------------------------------------------------------------------------------------------------------------------------------------------------------------------------------------------------------------------------------------------------------------------------------------------------------------------------------------------------------------------------------------------------------------------------------------------------------------------------------------------------------------------------------------------------------------------------------------------------------------------------------------------------------------------------------------------------------------------------------------------------------------------------------------------------------------------------------------------------------------------------------------------------------------------------------------------------------------------------------------------------------------------------------------------------------------------------------------------------------------------------------------------------------------------------------------------------------------------------------------------------------------------------------------------------------------------------------------------------------------------------------------------------------------------------------------------------------------------------------------------------------------------------------------------------------------------------------------------------------------------------------------------------------------------------------------------------------------------------------------------------------------------------------------------------------------------------------------------------------------------------------------------------------------------------------------------------------------------------------------------------------------------------------------------------------------------------------------------------------------------------------------------------------------------------------------------------------------------------------------------------------------------------------------------------------------------------------------------------------------------------------------------------------------------------------------------------------------------------------------------|-------------------------------------------------------------------------------------------------------------------------------------------------------------------------------------------|
| ➤ from 7.55 ppm to 6.29 ppm, aromatic protons;                                                                                                                                                                                                                                                                                                                                                                                                                                                                                                                                                                                                                                                                                                                                                                                                                                                                                                                                                                                                                                                                                                                                                                                                                                                                                                                                                                                                                                                                                                                                                                                                                                                                                                                                                                                                                                                                                                                                                                                                                                                                                                                                                                                                                                                                                                                                                                                                                                                                                                                                                                                                                                                                                                                                                                                                                                                                                                                                                                                                                                                                                                                                                                                                                                                                                                                                                                                                                                                                                                                                                                                                                                                                                |                                                                                                                                                                                           |
| 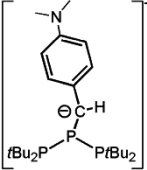                                                                                                                                                                                                                                                                                                                                                                                                                                                                                                                                                                                                                                                                                                                                                                                                                                                                                                                                                                                                                                                                                                                                                                                                                                                                                                                                                                                                                                                                                                                                                                                                                                                                                                                                                                                                                                                                                                                                                                                                                                                                                                                                                                                                                                                                                                                                                                                                                                                                                                                                                                                                                                                                                                                                                                                                                                                                                                                                                                                                                                                                                                                                                                                                                                                                                                                                                                                                                                                                                                                                                                                                                                             | $[\text{tBu}_2\text{P}-\text{P}-\{\text{C}(\text{H})(p\text{-Me}_2\text{N-C}_6\text{H}_4)\}-\text{P}t\text{Bu}_2]^-$<br><b>(2_4)</b>                                                      |
| <ul style="list-style-type: none"> <li>➤ 4.00 ppm, dd, <math>J_{\text{PH}} = 9.6</math> Hz, <math>J_{\text{HH}} = 6.5</math> Hz <math>[\text{tBu}_2\text{P}-\text{P}-\{\text{C}(\text{H})(p\text{-Me}_2\text{N-C}_6\text{H}_4)\}-\text{P}t\text{Bu}_2]^-</math>;</li> <li>➤ 2.88 ppm, s, <math>[\text{tBu}_2\text{P}-\text{P}-\{\text{C}(\text{H})(p\text{-Me}_2\text{N-C}_6\text{H}_4)\}-\text{P}t\text{Bu}_2]^-</math>;</li> <li>➤ 2.84 ppm, s, <math>[\text{tBu}_2\text{P}-\text{P}-\{\text{C}(\text{H})(p\text{-Me}_2\text{N-C}_6\text{H}_4)\}-\text{P}t\text{Bu}_2]^-</math>;</li> <li>➤ 1.38 ppm, d, <math>J_{\text{PH}} = 10.1</math> Hz, <math>[\text{tBu}_2\text{P}-\text{P}-\{\text{C}(\text{H})(p\text{-Me}_2\text{N-C}_6\text{H}_4)\}-\text{P}t\text{Bu}_2]^-</math>;</li> <li>➤ 1.24 ppm, d, <math>J_{\text{PH}} = 9.8</math> Hz, <math>[\text{tBu}_2\text{P}-\text{P}-\{\text{C}(\text{H})(p\text{-Me}_2\text{N-C}_6\text{H}_4)\}-\text{P}t\text{Bu}_2]^-</math>;</li> <li>➤ 1.05 ppm, d, <math>J_{\text{PH}} = 9.8</math> Hz, <math>[\text{tBu}_2\text{P}-\text{P}-\{\text{C}(\text{H})(p\text{-Me}_2\text{N-C}_6\text{H}_4)\}-\text{P}t\text{Bu}_2]^-</math>;</li> <li>➤ 1.05 ppm, d, <math>J_{\text{PH}} = 10.8</math> Hz, <math>[\text{tBu}_2\text{P}-\text{P}-\{\text{C}(\text{H})(p\text{-Me}_2\text{N-C}_6\text{H}_4)\}-\text{P}t\text{Bu}_2]^-</math></li> </ul>                                                                                                                                                                                                                                                                                                                                                                                                                                                                                                                                                                                                                                                                                                                                                                                                                                                                                                                                                                                                                                                                                                                                                                                                                                                                                                                                                                                                                                                                                                                                                                                                                                                                                                                                                                                                                                                                                                                                                                                                                                                                                                                                                                                                                                                                                                                                        |                                                                                                                                                                                           |
|                                                                                                                                                                                                                                                                                                                                                                                                                                                                                                                                                                                                                                                                                                                                                                                                                                                                                                                                                                                                                                                                                                                                                                                                                                                                                                                                                                                                                                                                                                                                                                                                                                                                                                                                                                                                                                                                                                                                                                                                                                                                                                                                                                                                                                                                                                                                                                                                                                                                                                                                                                                                                                                                                                                                                                                                                                                                                                                                                                                                                                                                                                                                                                                                                                                                                                                                                                                                                                                                                                                                                                                                                                             | $[\{\text{P}(t\text{Bu})_2-\text{CH}(p\text{-Me}_2\text{N-C}_6\text{H}_4)-\text{CH}(p\text{-Me}_2\text{N-C}_6\text{H}_4)-\text{P}-(\text{P}t\text{Bu}_2)\}_2\text{Li}]^-$<br><b>(4c*)</b> |
| <ul style="list-style-type: none"> <li>➤ 3.84 ppm, broad d, <math>J_{\text{PH}} = 10.9</math> Hz, <math>[\{\text{P}(t\text{Bu})_2-\text{CH}(p\text{-Me}_2\text{N-C}_6\text{H}_4)-\text{CH}(p\text{-Me}_2\text{N-C}_6\text{H}_4)-\text{P}-(\text{P}t\text{Bu}_2)\}_2\text{Li}]^-</math>;</li> <li>➤ 3.76 ppm, broad m, <math>J_{\text{PH}} = 4.4</math> Hz, <math>[\{\text{P}(t\text{Bu})_2-\text{CH}(p\text{-Me}_2\text{N-C}_6\text{H}_4)-\text{CH}(p\text{-Me}_2\text{N-C}_6\text{H}_4)-\text{P}-(\text{P}t\text{Bu}_2)\}_2\text{Li}]^-</math>;</li> <li>➤ 3.69 ppm, broad d, <math>J_{\text{PH}} = 11.5</math> Hz, <math>[\{\text{P}(t\text{Bu})_2-\text{CH}(p\text{-Me}_2\text{N-C}_6\text{H}_4)-\text{CH}(p\text{-Me}_2\text{N-C}_6\text{H}_4)-\text{P}-(\text{P}t\text{Bu}_2)\}_2\text{Li}]^-</math>;</li> <li>➤ 3.52 ppm, broad m, <math>J_{\text{HH}} = 5.4</math> Hz, <math>[\{\text{P}(t\text{Bu})_2-\text{CH}(p\text{-Me}_2\text{N-C}_6\text{H}_4)-\text{CH}(p\text{-Me}_2\text{N-C}_6\text{H}_4)-\text{P}-(\text{P}t\text{Bu}_2)\}_2\text{Li}]^-</math>;</li> <li>➤ 2.90 ppm, s, <math>[\{\text{P}(t\text{Bu})_2-\text{CH}(p\text{-Me}_2\text{N-C}_6\text{H}_4)-\text{CH}(p\text{-Me}_2\text{N-C}_6\text{H}_4)-\text{P}-(\text{P}t\text{Bu}_2)\}_2\text{Li}]^-</math>;</li> <li>➤ 2.82 ppm, s, <math>[\{\text{P}(t\text{Bu})_2-\text{CH}(p\text{-Me}_2\text{N-C}_6\text{H}_4)-\text{CH}(p\text{-Me}_2\text{N-C}_6\text{H}_4)-\text{P}-(\text{P}t\text{Bu}_2)\}_2\text{Li}]^-</math>;</li> <li>➤ 2.78 ppm, s, <math>[\{\text{P}(t\text{Bu})_2-\text{CH}(p\text{-Me}_2\text{N-C}_6\text{H}_4)-\text{CH}(p\text{-Me}_2\text{N-C}_6\text{H}_4)-\text{P}-(\text{P}t\text{Bu}_2)\}_2\text{Li}]^-</math>;</li> <li>➤ 2.71 ppm, s, <math>[\{\text{P}(t\text{Bu})_2-\text{CH}(p\text{-Me}_2\text{N-C}_6\text{H}_4)-\text{CH}(p\text{-Me}_2\text{N-C}_6\text{H}_4)-\text{P}-(\text{P}t\text{Bu}_2)\}_2\text{Li}]^-</math>;</li> <li>➤ 1.44 ppm, <math>J_{\text{PH}} = 10.9</math> Hz, <math>[\{\text{P}(t\text{Bu})_2-\text{CH}(p\text{-Me}_2\text{N-C}_6\text{H}_4)-\text{CH}(p\text{-Me}_2\text{N-C}_6\text{H}_4)-\text{P}-(\text{P}t\text{Bu}_2)\}_2\text{Li}]^-</math>;</li> <li>➤ 1.39 ppm, broad d, <math>J_{\text{PH}} = 10.2</math> Hz, <math>[\{\text{P}(t\text{Bu})_2-\text{CH}(p\text{-Me}_2\text{N-C}_6\text{H}_4)-\text{CH}(p\text{-Me}_2\text{N-C}_6\text{H}_4)-\text{P}-(\text{P}t\text{Bu}_2)\}_2\text{Li}]^-</math>;</li> <li>➤ 1.28 ppm, broad d, <math>J_{\text{PH}} = 10.8</math> Hz, <math>[\{\text{P}(t\text{Bu})_2-\text{CH}(p\text{-Me}_2\text{N-C}_6\text{H}_4)-\text{CH}(p\text{-Me}_2\text{N-C}_6\text{H}_4)-\text{P}-(\text{P}t\text{Bu}_2)\}_2\text{Li}]^-</math>;</li> <li>➤ 1.24 ppm, d, <math>J_{\text{PH}} = 10.14</math> Hz, <math>[\{\text{P}(t\text{Bu})_2-\text{CH}(p\text{-Me}_2\text{N-C}_6\text{H}_4)-\text{CH}(p\text{-Me}_2\text{N-C}_6\text{H}_4)-\text{P}-(\text{P}t\text{Bu}_2)\}_2\text{Li}]^-</math>;</li> <li>➤ 1.23 ppm, d, <math>J_{\text{PH}} = 10.14</math> Hz, <math>[\{\text{P}(t\text{Bu})_2-\text{CH}(p\text{-Me}_2\text{N-C}_6\text{H}_4)-\text{CH}(p\text{-Me}_2\text{N-C}_6\text{H}_4)-\text{P}-(\text{P}t\text{Bu}_2)\}_2\text{Li}]^-</math>;</li> <li>➤ 1.15 ppm, d, <math>J_{\text{PH}} = 10.9</math> Hz, <math>[\{\text{P}(t\text{Bu})_2-\text{CH}(p\text{-Me}_2\text{N-C}_6\text{H}_4)-\text{CH}(p\text{-Me}_2\text{N-C}_6\text{H}_4)-\text{P}-(\text{P}t\text{Bu}_2)\}_2\text{Li}]^-</math>;</li> <li>➤ 0.98 ppm, d, <math>J_{\text{PH}} = 10.0</math> Hz, <math>[\{\text{P}(t\text{Bu})_2-\text{CH}(p\text{-Me}_2\text{N-C}_6\text{H}_4)-\text{CH}(p\text{-Me}_2\text{N-C}_6\text{H}_4)-\text{P}-(\text{P}t\text{Bu}_2)\}_2\text{Li}]^-</math>;</li> </ul> |                                                                                                                                                                                           |

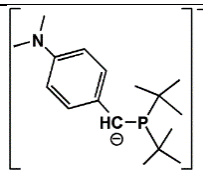

➤  $[(p\text{-Me}_2\text{N-C}_6\text{H}_4)(\text{H})\text{C-P}(t\text{Bu})_2]^-$  (**4c'**)

- 2.80 ppm, s,  $[(p\text{-Me}_2\text{N-C}_6\text{H}_4)(\text{H})\text{C-P}(t\text{Bu})_2]^-$ ;
- 2.86 ppm, s,  $[(p\text{-Me}_2\text{N-C}_6\text{H}_4)(\text{H})\text{C-P}(t\text{Bu})_2]^-$ ;
- 1.14 ppm, d,  $J_{\text{PH}} = 10.4$  Hz,  $[(p\text{-Me}_2\text{N-C}_6\text{H}_4)(\text{H})\text{C-P}(t\text{Bu})_2]^-$ ;

4. NMR spectra of isolated (3,5-*t*Bu<sub>2</sub>C<sub>6</sub>H<sub>3</sub>)(H)C=P-P*t*Bu<sub>2</sub> (**3**).

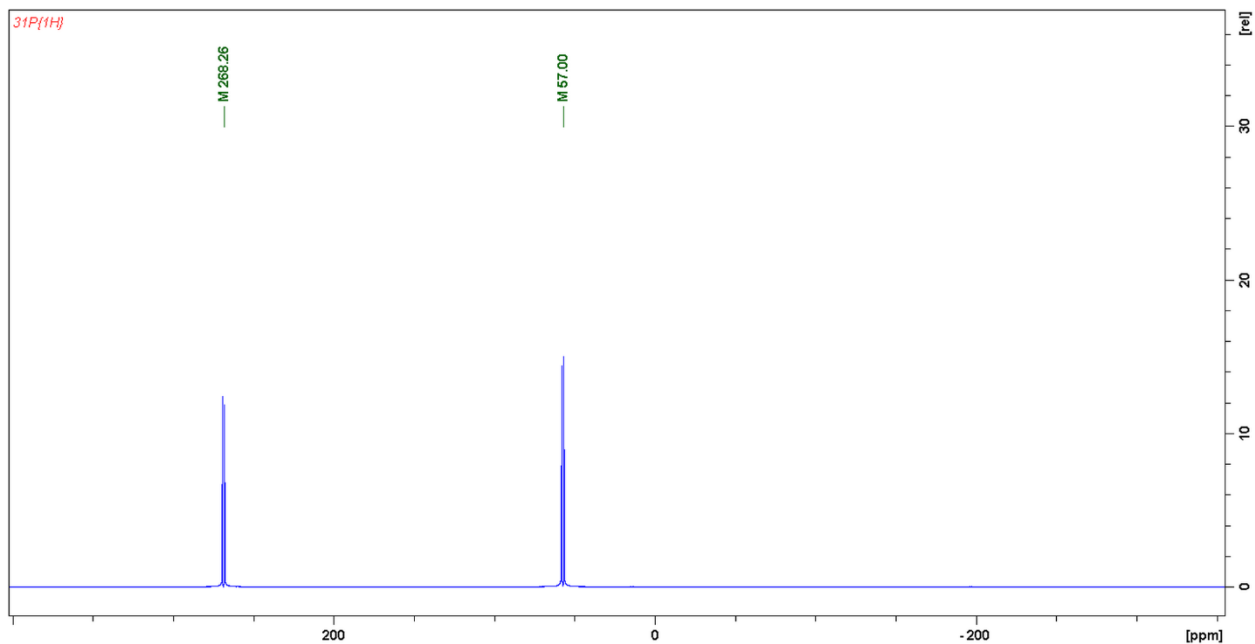

**Figure S48.** <sup>31</sup>P{<sup>1</sup>H} NMR (400 MHz, C<sub>6</sub>D<sub>6</sub>, 298 K) spectrum of isolated (3,5-*t*Bu<sub>2</sub>C<sub>6</sub>H<sub>3</sub>)(H)C=P-P*t*Bu<sub>2</sub> (**3**).

- 268.26 ppm,  $J_{P-P} = 224.9$  Hz, (3,5-*t*Bu<sub>2</sub>C<sub>6</sub>H<sub>3</sub>)(H)C=P-P*t*Bu<sub>2</sub>;
- 57.00 ppm,  $J_{P-P} = 224.9$  Hz, (3,5-*t*Bu<sub>2</sub>C<sub>6</sub>H<sub>3</sub>)(H)C=P-P*t*Bu<sub>2</sub>;

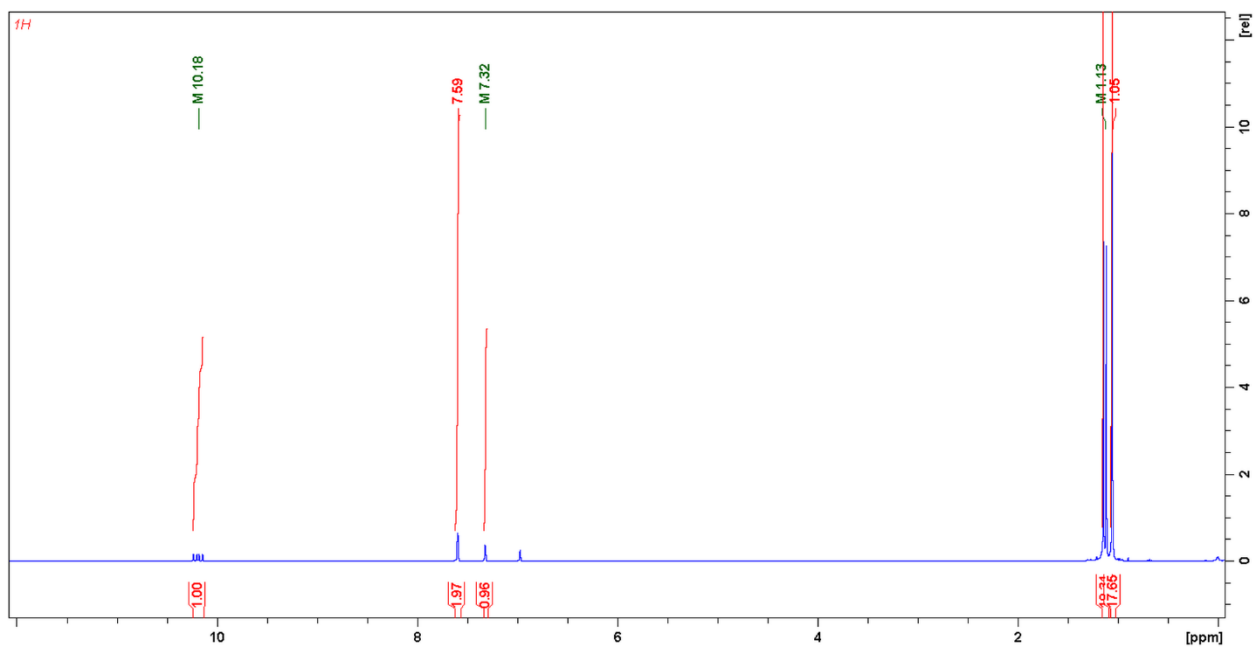

**Figure S49.** <sup>1</sup>H NMR (400 MHz, C<sub>6</sub>D<sub>6</sub>, 298 K) spectrum of isolated (3,5-*t*Bu<sub>2</sub>C<sub>6</sub>H<sub>3</sub>)(H)C=P-P*t*Bu<sub>2</sub> (**3**)

- 10.18 ppm, dd,  $J_{P-H} = 22.6$  Hz,  $J_{P-H} = 13.9$  Hz, 1H, (3,5-*t*Bu<sub>2</sub>C<sub>6</sub>H<sub>3</sub>)(H)C=P-P*t*Bu<sub>2</sub>;

- 7.59 – 7.32 ppm, 3H, (3,5-*t*Bu<sub>2</sub>C<sub>6</sub>H<sub>3</sub>)(H)C=P-*Pt*Bu<sub>2</sub>;
- 1.13 ppm, d,  $J_{P-H} = 11.2$  Hz, 18H, (3,5-*t*Bu<sub>2</sub>C<sub>6</sub>H<sub>3</sub>)(H)C=P-*Pt*Bu<sub>2</sub>;
- 1.05 ppm, s, 18H, (3,5-*t*Bu<sub>2</sub>C<sub>6</sub>H<sub>3</sub>)(H)C=P-*Pt*Bu<sub>2</sub>;

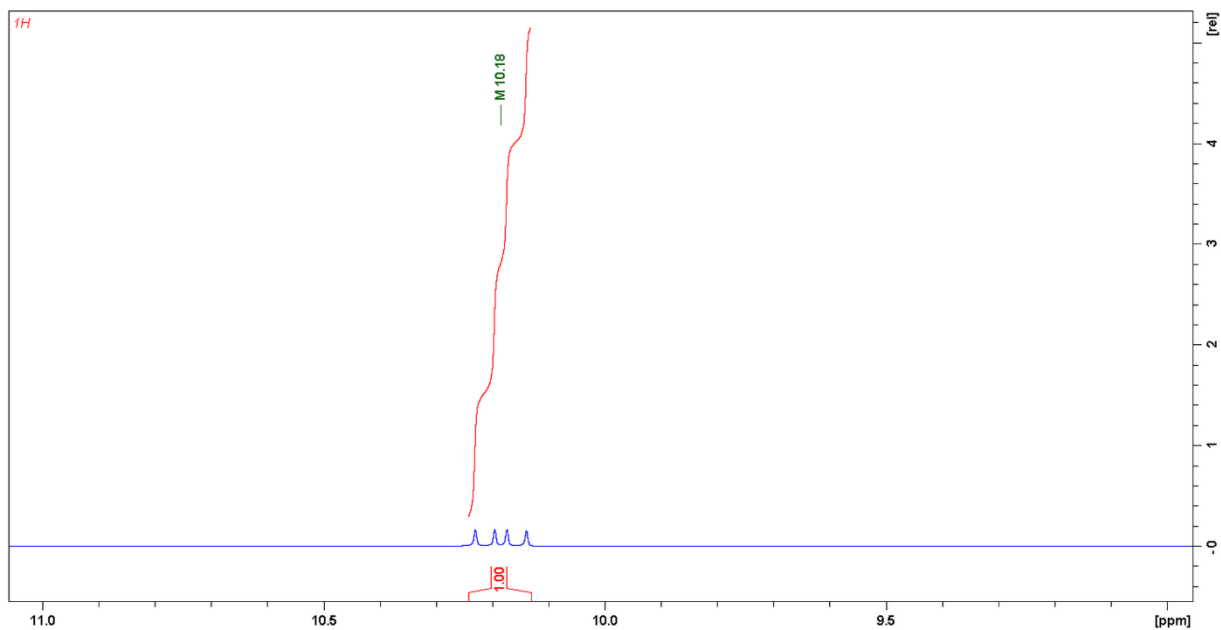

**Figure S50.** <sup>1</sup>H NMR (400 MHz, C<sub>6</sub>D<sub>6</sub>, 298 K) spectrum of isolated (3,5-*t*Bu<sub>2</sub>C<sub>6</sub>H<sub>3</sub>)(H)C=P-*Pt*Bu<sub>2</sub> (**3**) in the range from 11 ppm to 9 ppm.

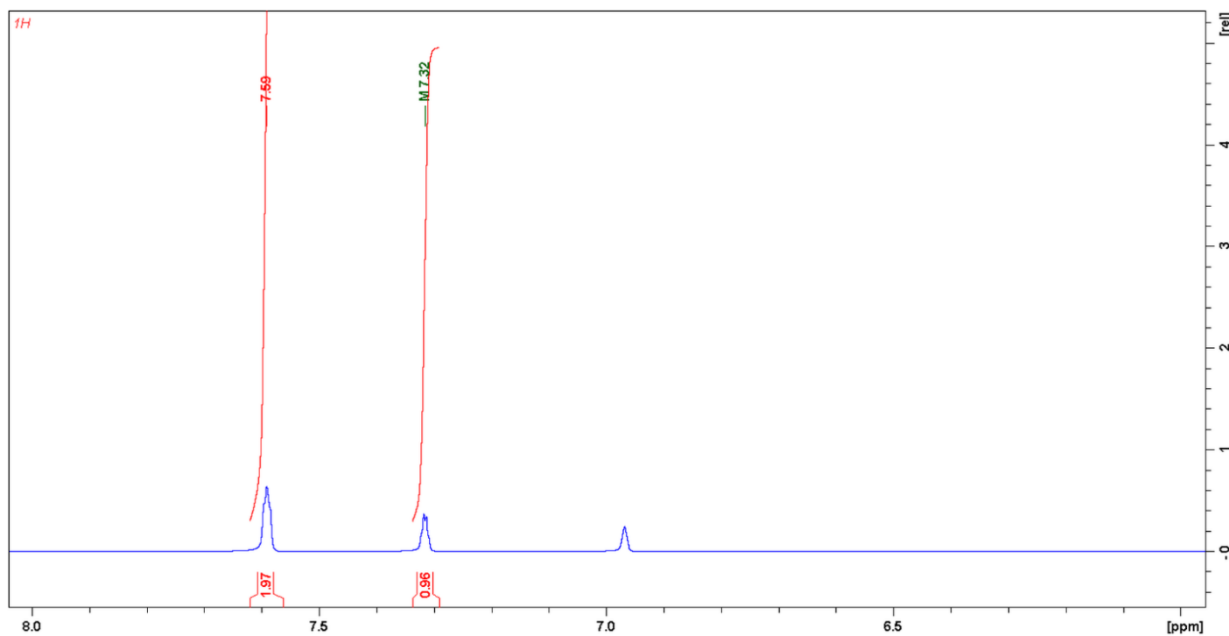

**Figure S51.** <sup>1</sup>H NMR (400 MHz, C<sub>6</sub>D<sub>6</sub>, 298 K) spectrum of isolated (3,5-*t*Bu<sub>2</sub>C<sub>6</sub>H<sub>3</sub>)(H)C=P-*Pt*Bu<sub>2</sub> (**3**) in the range from 8 ppm to 6 ppm.

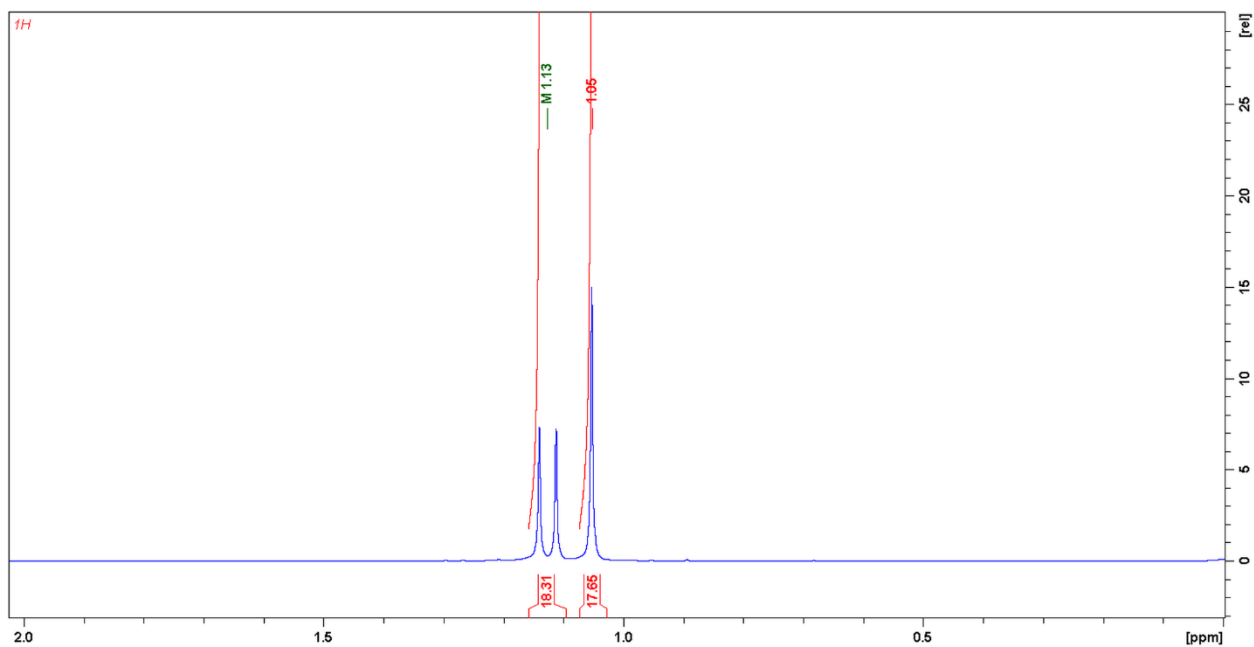

**Figure S52.**  $^1\text{H}$  NMR (400 MHz,  $\text{C}_6\text{D}_6$ , 298 K) spectrum of isolated  $(3,5\text{-}t\text{Bu}_2\text{C}_6\text{H}_3)(\text{H})\text{C}=\text{P-P}t\text{Bu}_2$  (**3**) in the range from 2 ppm to 0 ppm.

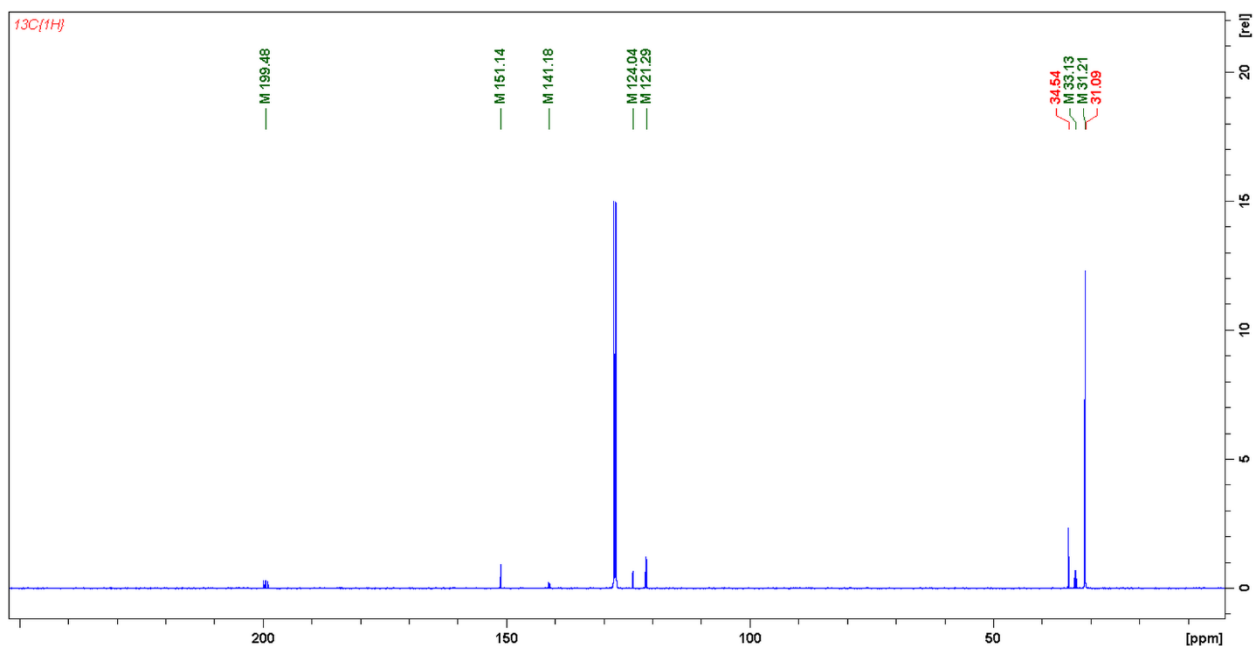

**Figure S53.**  $^{13}\text{C}\{^1\text{H}\}$  NMR (400 MHz,  $\text{C}_6\text{D}_6$ , 298 K) spectrum of isolated  $(3,5\text{-}t\text{Bu}_2\text{C}_6\text{H}_3)(\text{H})\text{C}=\text{P-P}t\text{Bu}_2$  (**3**).

- 199.48 ppm, dd,  $J_{\text{P-C}} = 45.4$  Hz,  $J_{\text{P-C}} = 39.9$  Hz  $(3,5\text{-}t\text{Bu}_2\text{C}_6\text{H}_3)(\text{H})\text{C}=\text{P-P}t\text{Bu}_2$ ;
- 151.14 ppm, d,  $J_{\text{P-C}} = 2.7$  Hz  $(3,5\text{-}t\text{Bu}_2\text{C}_6\text{H}_3)(\text{H})\text{C}=\text{P-P}t\text{Bu}_2$  (*i*- $\text{C}_{\text{Ar}}$ );
- 141.18 ppm, dd,  $J_{\text{P-C}} = 15.4$  Hz,  $J_{\text{P-C}} = 11.8$  Hz,  $(3,5\text{-}t\text{Bu}_2\text{C}_6\text{H}_3)(\text{H})\text{C}=\text{P-P}t\text{Bu}_2$  (*o*- $\text{C}_{\text{Ar}}$ );
- 124.04 ppm, d,  $J_{\text{P-C}} = 6.3$  Hz,  $(3,5\text{-}t\text{Bu}_2\text{C}_6\text{H}_3)(\text{H})\text{C}=\text{P-P}t\text{Bu}_2$  (*m*- $\text{C}_{\text{Ar}}$ );
- 121.29 ppm, d,  $J_{\text{P-C}} = 19.9$  Hz,  $(3,5\text{-}t\text{Bu}_2\text{C}_6\text{H}_3)(\text{H})\text{C}=\text{P-P}t\text{Bu}_2$  (*p*- $\text{C}_{\text{Ar}}$ );
- 34.54 ppm, s,  $(3,5\text{-}\{\text{C}(\text{CH}_3)_3\}_2\text{C}_6\text{H}_3)(\text{H})\text{C}=\text{P-P}t\text{Bu}_2$ ;

- 33.13 ppm, dd,  $J_{P-C} = 27.2$  Hz,  $J_{P-C} = 1.8$  Hz (3,5-*t*Bu<sub>2</sub>C<sub>6</sub>H<sub>3</sub>)(H)C=P-P{C(CH<sub>3</sub>)<sub>3</sub>}<sub>2</sub>;
- 31.21 ppm, dd,  $J_{P-C} = 13.6$  Hz,  $J_{P-C} = 4.5$  Hz (3,5-*t*Bu<sub>2</sub>C<sub>6</sub>H<sub>3</sub>)(H)C=P-P{C(CH<sub>3</sub>)<sub>3</sub>}<sub>2</sub>;
- 31.09 ppm, s, (3,5-{C(CH<sub>3</sub>)<sub>3</sub>}<sub>2</sub>C<sub>6</sub>H<sub>3</sub>)(H)C=P-*Pt*Bu<sub>2</sub>;

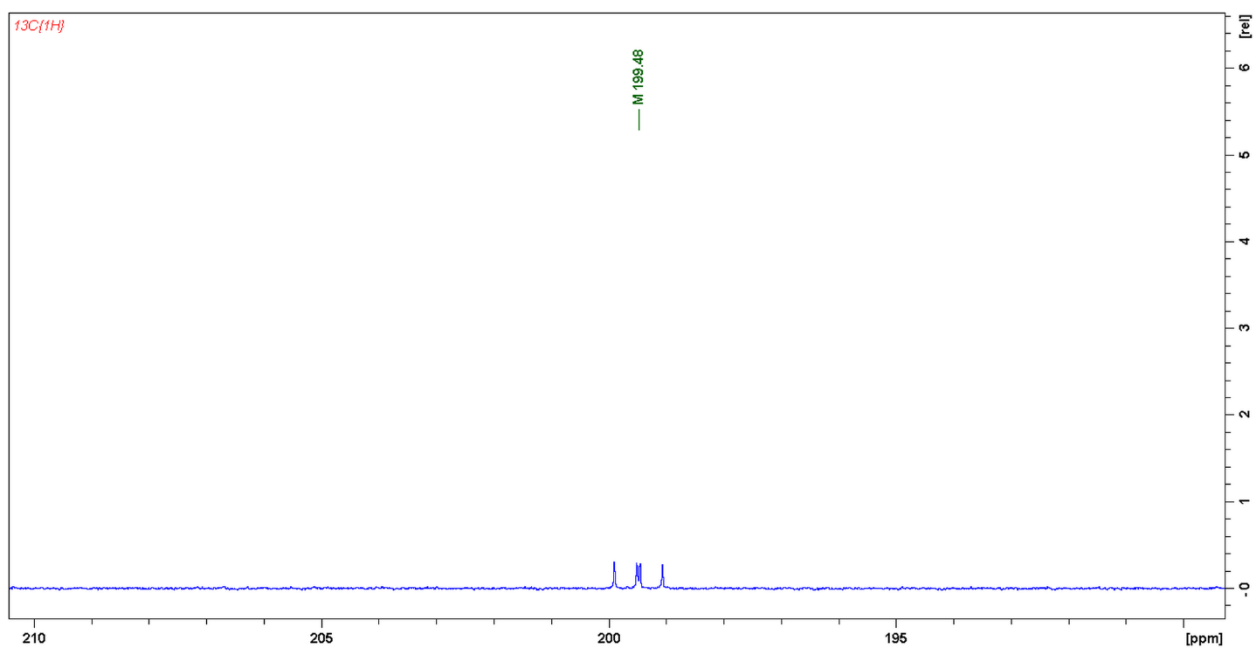

**Figure S54.** <sup>13</sup>C{<sup>1</sup>H} NMR (400 MHz, C<sub>6</sub>D<sub>6</sub>, 298 K) spectrum of isolated (3,5-*t*Bu<sub>2</sub>C<sub>6</sub>H<sub>3</sub>)(H)C=P-*Pt*Bu<sub>2</sub> (**3**) in the range from 210 ppm to 190 ppm.

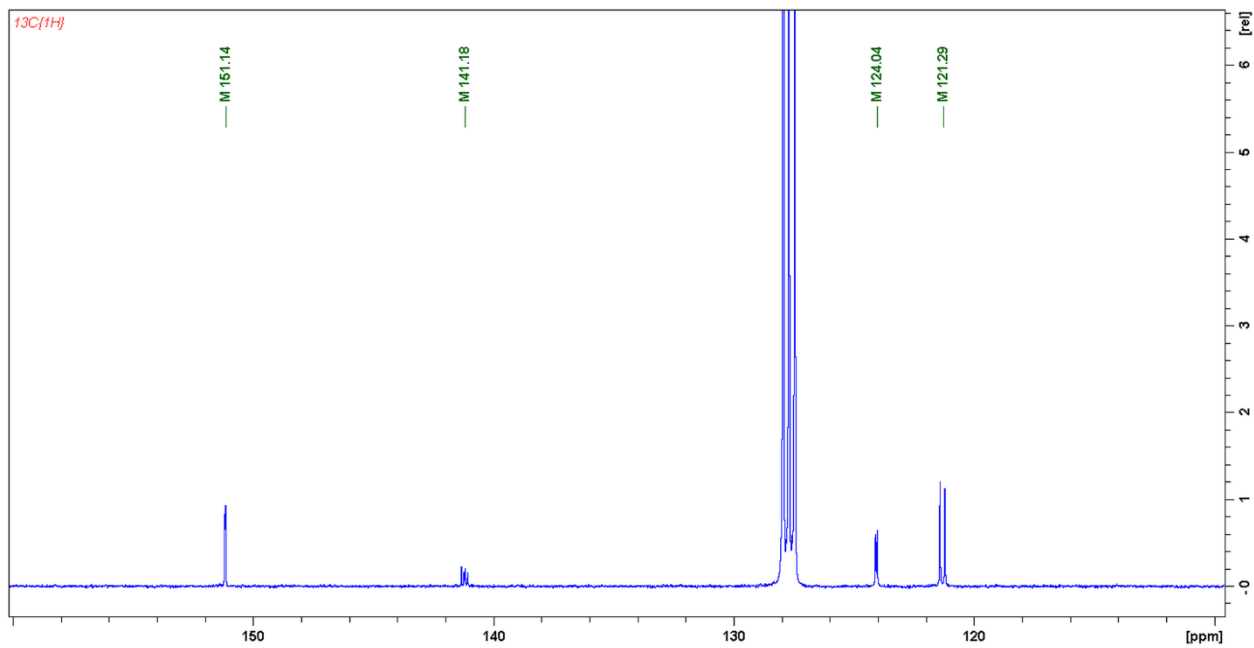

**Figure S55.** <sup>13</sup>C{<sup>1</sup>H} NMR (400 MHz, C<sub>6</sub>D<sub>6</sub>, 298 K) spectrum of isolated (3,5-*t*Bu<sub>2</sub>C<sub>6</sub>H<sub>3</sub>)(H)C=P-*Pt*Bu<sub>2</sub> (**3**) in the range from 160 ppm to 110 ppm.

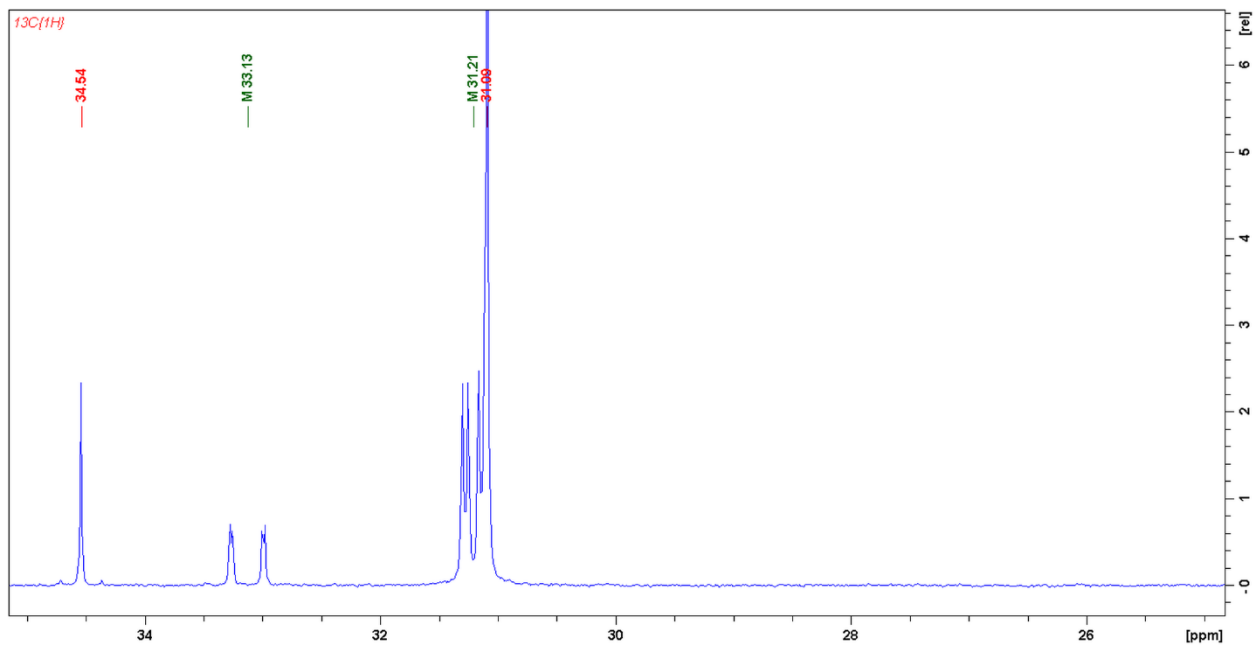

**Figure S56.**  $^{13}\text{C}\{^1\text{H}\}$ -NMR (400 MHz,  $\text{C}_6\text{D}_6$ , 298 K) spectrum of isolated  $(3,5\text{-}i\text{Bu}_2\text{C}_6\text{H}_3)(\text{H})\text{C}=\text{P}-\text{PrBu}_2$  (**3**) in the range from 35 ppm to 25 ppm.

## PART C. DFT calculation details

### D.1. General methods

All calculations presented in the paper were performed using the Gaussian 09<sup>3</sup> program package. Molecular geometries of all compounds were optimized using density functional theory at the TPSS/TPSS functional by Tao *et al*<sup>4</sup> with 6-31+G(d,p) basis set. The TPSS/TPSS exchange-correlation functional has been chosen, as it has good overall performance for the description of kinetic and thermodynamic parameters of reactions. By adding GD3BJ keyword that includes D3 version of Grimme dispersion with Becke-Johnson<sup>5</sup> damping into calculations it also accounts well for long-range and dispersion interactions. Molecular geometries were energy-optimized and the most stable (the lowest energy) conformer was identified during the potential energy surface scanning. Nature of the final gas-phase geometries as local minima (no imaginary frequencies) on the potential energy surface was then validated by harmonic frequency calculations at the same level of theory. Values of calculated energies, enthalpies and Gibbs free-energies derived from thermochemical calculations were corrected for the zero-point energy (ZPE).

**Table S28.** Selected computational parameters obtained for considered systems (in atomic units A.U.):  $\epsilon_0$  - electronic energy;  $\epsilon_0 + \dots$  - sum of electronic and:  $E_{zpe}$  - zero-point energies,  $E_{therm}$  - thermal energies,  $H$  - thermal enthalpies,  $G$  - thermal free energies calculated at TPSS/TPSS//6-31+G(d,p) [TPSS/TPSS//LANL2DZ for Ti] level of theory. Values of  $\Delta H^{\circ}_{298K/273K/253K}$  and  $\Delta G^{\circ}_{298K/273K/253K}$  were calculated as the difference between energy of products and substrates along the reaction path.

| Compound                          | $E_{electr}$ [A.U.] | $\epsilon_0 + E_{ZPE}$ [A.U.] | $\epsilon_0 + E_{therm}$ [A.U.] | $\epsilon_0 + H$ [A.U.] | $\epsilon_0 + G$ [A.U.] |
|-----------------------------------|---------------------|-------------------------------|---------------------------------|-------------------------|-------------------------|
| (biph)(H)C=P-PrBu <sub>2</sub>    | -2756.748730        | -2755.870773                  | -2755.818193                    | -2755.817249            | -2755.952186            |
| [Me] <sup>-</sup>                 | -576.804227         | -576.615676                   | -576.604657                     | -576.603713             | -576.653632             |
| 1a                                | -575.607850         | -575.440898                   | -575.431082                     | -575.430138             | -575.476274             |
| [tBu <sub>2</sub> P] <sup>-</sup> | -669.067353         | -668.880585                   | -668.867673                     | -668.866729             | -668.921430             |
| 2a                                | -761.329100         | -761.144129                   | -761.129331                     | -761.128386             | -761.187795             |
| 3a                                | -805.909108         | -805.656488                   | -805.640181                     | -805.639237             | -805.701418             |
| 4                                 | -502.981595         | -502.762110                   | -502.749873                     | -502.748929             | -502.801997             |
| 3a'                               | -4853.591621        | -4852.204228                  | -4852.117211                    | -4852.116267            | -4852.338227            |



## D.2. Thermodynamics of considered reactions

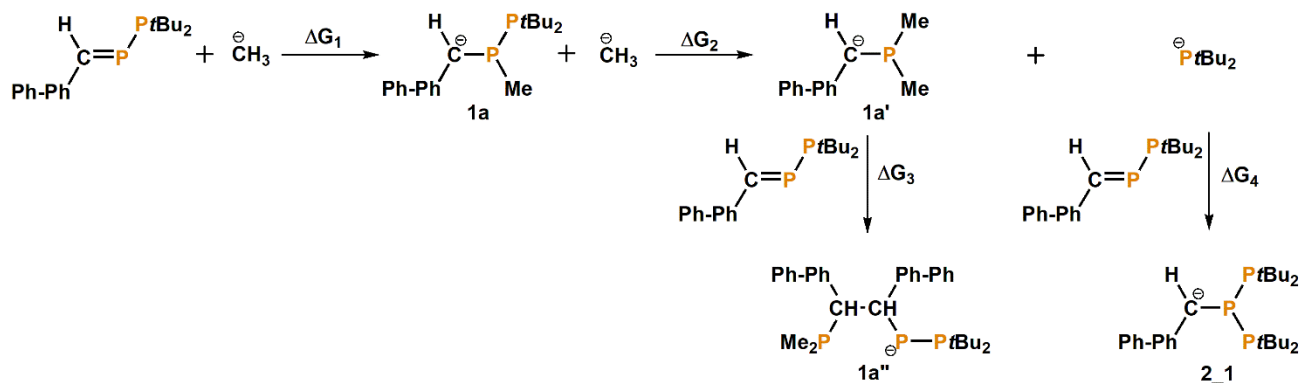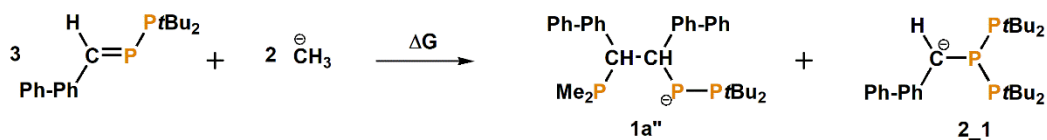

**Scheme S1.** Reaction of (biph)(H)C=P-PtBu<sub>2</sub> with Me<sup>-</sup> along with consecutive steps leading to formation of **3a** and **4**.

**Table S29.** Values of  $\Delta H^{\circ}_{298K}$ ,  $\Delta G^{\circ}_{298K}$  and  $K_{298K}$  calculated as the difference between energy of products and substrates along the assumed reaction path (consecutive steps of formation of **1a''** and **2\_1**).

| Reaction Step | $\Delta H^{\circ}_{298K}$ [kcal mol <sup>-1</sup> ] | $\Delta G^{\circ}_{298K}$ [kcal mol <sup>-1</sup> ] | $K_{298K}$ |
|---------------|-----------------------------------------------------|-----------------------------------------------------|------------|
| 1             | -75.45                                              | -62.72                                              | 1.20E+45   |
| 2             | -36.09                                              | -38.34                                              | 5.25E+06   |
| 3             | -34.34                                              | -18.43                                              | 1.70E+03   |
| 4             | -49.05                                              | -33.76                                              | 8.27E+05   |
| Total         | -194.93                                             | -153.25                                             | 7.29E+26   |

### D.3. Electrostatic potential map and Mulliken atomic charges of 1a\*

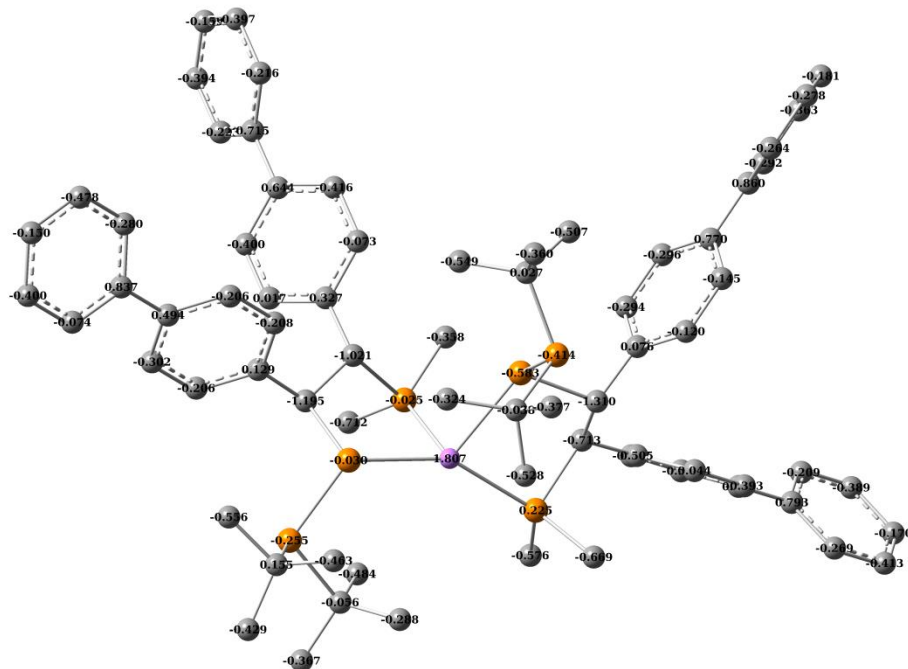

Figure S57. Optimized molecular structure of 1a\* together with charge distribution (Mulliken atomic charges).

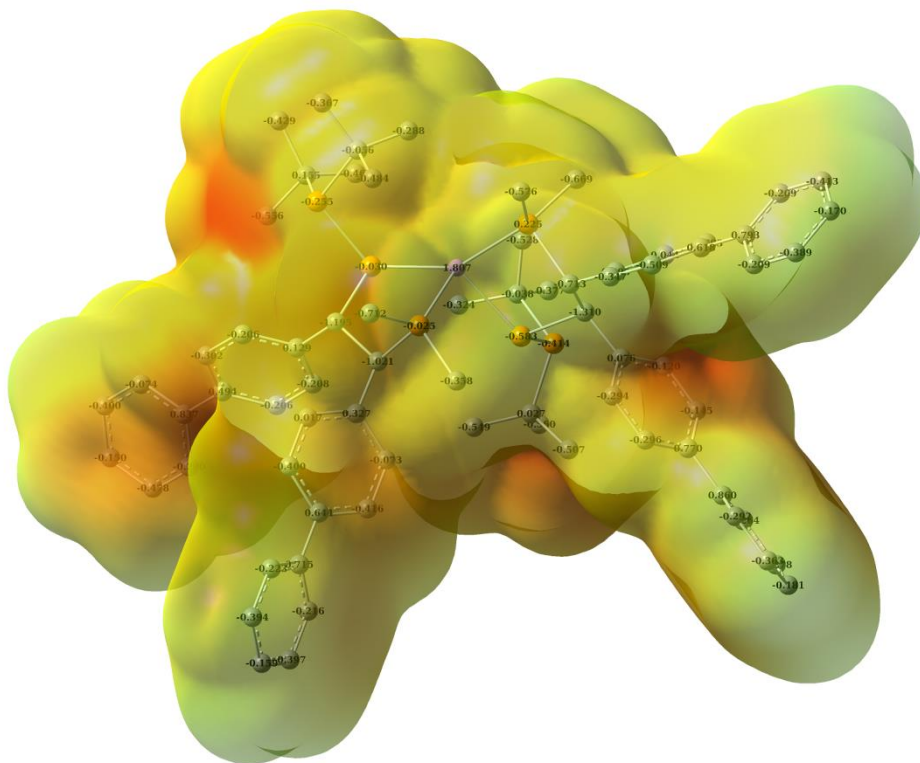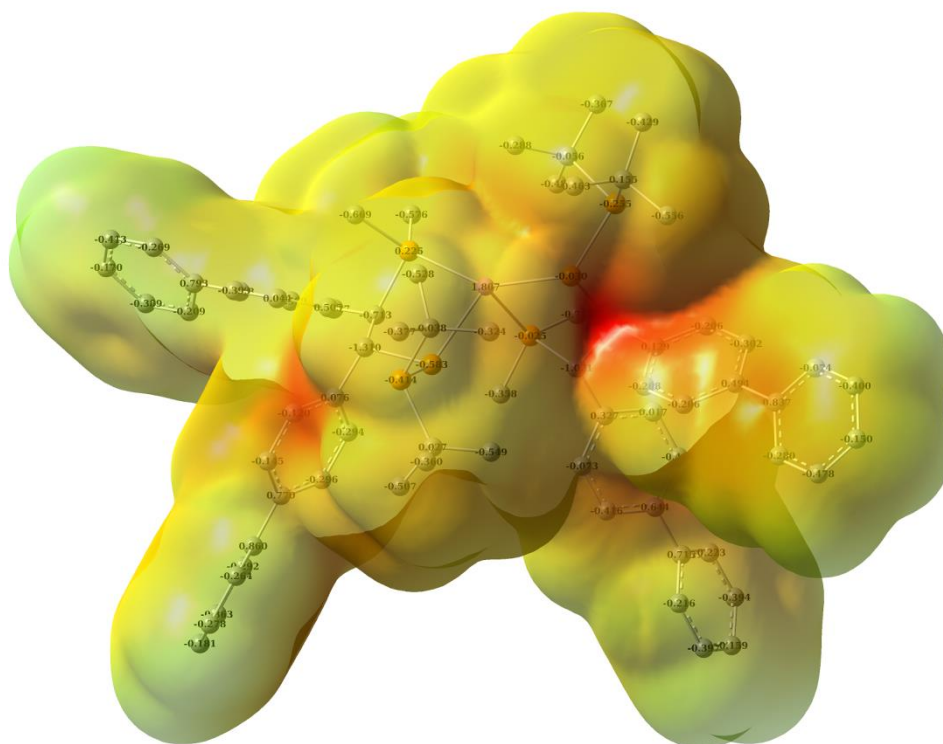

**Figure S58.** Electron density surface (isovalue = 0.004 e/Å<sup>3</sup>) mapped with electrostatic potential for compound **1a\***. The red areas correspond to the negative electrostatic potential and the blue areas to the positive ones (two representations along with Mulliken atomic charges).

#### D.4. Optimized structures and Cartesian coordinates

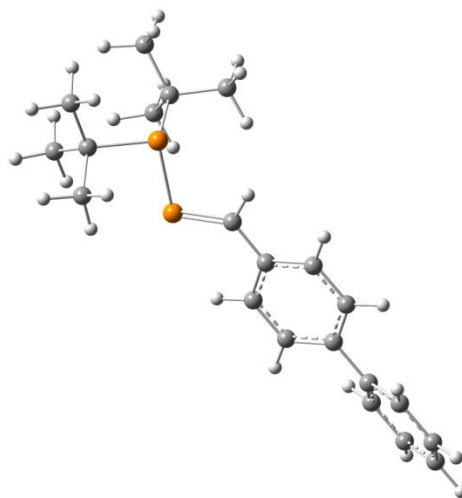

**Figure S59.** Optimized structure of (biph)(H)C=P-PtBu<sub>2</sub>.

Below are presented xyz coordinates for optimized geometry of (biph)(H)C=P-PtBu<sub>2</sub>:

|   |             |             |             |
|---|-------------|-------------|-------------|
| C | 0.45889400  | -0.07821200 | -0.58654700 |
| C | -0.98594700 | -0.06679300 | -0.39822600 |
| C | -1.60711700 | -0.35256000 | 0.84380300  |
| H | -0.98457200 | -0.58872700 | 1.70579200  |
| C | -2.99198300 | -0.34515000 | 0.97155300  |
| H | -3.44204300 | -0.59658700 | 1.93038600  |
| C | -3.83038100 | -0.04730200 | -0.13014700 |
| C | -3.21577600 | 0.24329200  | -1.36679300 |
| H | -3.83348500 | 0.50634400  | -2.22365500 |
| C | -1.82679900 | 0.23461500  | -1.49713600 |
| H | -1.37346000 | 0.47125800  | -2.45922900 |
| C | -5.30456400 | -0.03690800 | 0.01340700  |
| C | -5.91389600 | 0.41234600  | 1.20521400  |
| H | -5.29118300 | 0.78221200  | 2.01801300  |
| C | -7.30680900 | 0.42284500  | 1.33980500  |
| H | -7.75603600 | 0.78328900  | 2.26362700  |
| C | -8.12195100 | -0.01638100 | 0.28623700  |
| H | -9.20519000 | -0.00873200 | 0.39125400  |
| C | -7.53052300 | -0.46619200 | -0.90348600 |
| H | -8.15384500 | -0.81934600 | -1.72320700 |
| C | -6.13772000 | -0.47621700 | -1.03847900 |
| H | -5.68754700 | -0.85474200 | -1.95463300 |
| C | 3.91848800  | 1.67445200  | 0.01611000  |
| C | 3.67210700  | 1.92750100  | 1.51705900  |
| H | 4.26786600  | 1.26767800  | 2.15527000  |
| H | 3.94301200  | 2.96755700  | 1.75737900  |
| H | 2.61429000  | 1.78888500  | 1.77680100  |
| C | 3.01715700  | 2.63395800  | -0.79636400 |
| H | 1.95359300  | 2.44664400  | -0.59739100 |
| H | 3.23625800  | 3.67325200  | -0.50789700 |
| H | 3.19038700  | 2.52912900  | -1.87493600 |
| C | 5.39286900  | 1.96722400  | -0.32797300 |
| H | 6.07945300  | 1.39191000  | 0.30454600  |
| H | 5.61635500  | 1.74477300  | -1.37982000 |
| H | 5.59918900  | 3.03464200  | -0.15602200 |
| C | 4.63738700  | -1.39706100 | 0.06790500  |
| C | 5.92037500  | -1.40293900 | -0.79565100 |
| H | 5.67820300  | -1.51344400 | -1.86040200 |
| H | 6.50954100  | -0.48819300 | -0.67174900 |
| H | 6.55415500  | -2.25232700 | -0.49821300 |

|   |            |             |             |
|---|------------|-------------|-------------|
| C | 3.91496600 | -2.74803700 | -0.15193900 |
| H | 3.59025900 | -2.86444200 | -1.19463700 |
| H | 4.60440400 | -3.57164000 | 0.08727300  |
| H | 3.03250400 | -2.84718500 | 0.49433100  |
| C | 5.00224900 | -1.25493700 | 1.55660200  |
| H | 5.60525100 | -0.35817200 | 1.74231200  |
| H | 4.10645800 | -1.21033100 | 2.18912300  |
| H | 5.59780400 | -2.12528600 | 1.87364300  |
| P | 1.63495300 | -0.48819400 | 0.58703300  |
| P | 3.44469000 | -0.07534800 | -0.65005100 |
| H | 0.78757700 | 0.19946600  | -1.59241900 |

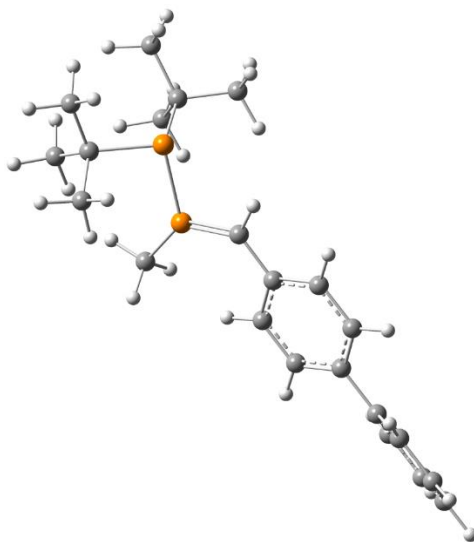

**Figure S60.** Optimized structure of **1a**.

Below are presented xyz coordinates for optimized geometry of **1a**:

|   |             |             |             |
|---|-------------|-------------|-------------|
| C | 0.36445200  | -1.37394000 | 0.89495700  |
| C | -0.96986700 | -0.97956000 | 0.63507600  |
| C | -1.44955300 | 0.37472700  | 0.73194300  |
| H | -0.74339100 | 1.15374700  | 1.02000200  |
| C | -2.77172600 | 0.71129900  | 0.49056200  |
| H | -3.06667800 | 1.75406600  | 0.61566900  |
| C | -3.75770900 | -0.25043500 | 0.12565300  |
| C | -3.29222600 | -1.59176300 | 0.01766000  |
| H | -3.98523100 | -2.37367100 | -0.29648600 |
| C | -1.97104100 | -1.94093300 | 0.25043500  |
| H | -1.66558400 | -2.98244400 | 0.13159900  |
| C | -5.15088700 | 0.11526200  | -0.12700600 |
| C | -5.53502600 | 1.44722400  | -0.45612600 |
| H | -4.76556100 | 2.21099500  | -0.55466400 |
| C | -6.86762000 | 1.79634200  | -0.68969800 |
| H | -7.10994400 | 2.82902200  | -0.94515500 |
| C | -7.89085300 | 0.83380700  | -0.61966900 |
| H | -8.92894300 | 1.10618300  | -0.80637800 |
| C | -7.53720100 | -0.48992700 | -0.30203600 |
| H | -8.31047800 | -1.25629000 | -0.22945000 |
| C | -6.20667000 | -0.83895800 | -0.05660200 |
| H | -5.97452300 | -1.86556200 | 0.22210700  |
| C | 3.83944900  | 1.80996400  | 0.12752500  |
| C | 4.56764200  | 1.53230900  | 1.45811400  |
| H | 5.27517900  | 0.69929600  | 1.37593400  |
| H | 5.13374900  | 2.42788400  | 1.76856700  |
| H | 3.84458000  | 1.30083000  | 2.25029300  |

|   |            |             |             |
|---|------------|-------------|-------------|
| C | 2.82650000 | 2.95707100  | 0.36210600  |
| H | 2.06028600 | 2.65685900  | 1.08819800  |
| H | 3.35384100 | 3.84282300  | 0.75524500  |
| H | 2.32336200 | 3.23541100  | -0.57289100 |
| C | 4.85946300 | 2.27679800  | -0.93045100 |
| H | 5.66396300 | 1.54476000  | -1.07739700 |
| H | 4.37406400 | 2.45713300  | -1.89896400 |
| H | 5.32650900 | 3.22069200  | -0.60038900 |
| C | 3.89907300 | -1.02130600 | -1.23152400 |
| C | 4.30980100 | -0.64509300 | -2.67592200 |
| H | 3.42524300 | -0.41837400 | -3.28433900 |
| H | 4.97477300 | 0.22592900  | -2.70387400 |
| H | 4.84379200 | -1.49231700 | -3.14124500 |
| C | 2.99263200 | -2.27044600 | -1.31845900 |
| H | 2.04702400 | -2.04131200 | -1.82643300 |
| H | 3.51147500 | -3.06340600 | -1.88303400 |
| H | 2.74466400 | -2.66093500 | -0.32618900 |
| C | 5.16206000 | -1.36165600 | -0.41977900 |
| H | 5.87062900 | -0.52375100 | -0.40010500 |
| H | 4.91810500 | -1.63051700 | 0.61307300  |
| H | 5.67982700 | -2.22024000 | -0.88206800 |
| P | 1.66304700 | -0.26462400 | 1.36657800  |
| P | 2.75047800 | 0.37101200  | -0.55301100 |
| H | 0.61665700 | -2.42404000 | 0.71720600  |
| C | 2.79952400 | -1.45903700 | 2.27209200  |
| H | 2.31873700 | -1.68165900 | 3.23369500  |
| H | 2.93849100 | -2.40795900 | 1.73610400  |
| H | 3.78120900 | -1.00947500 | 2.46473700  |

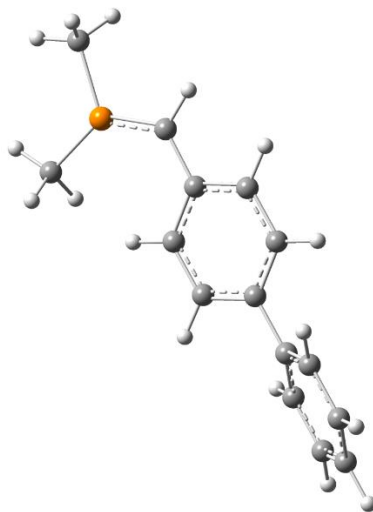

**Figure S61.** Optimized structure of **1a'**.

Below are presented xyz coordinates for optimized geometry of **1a'**:

|   |             |             |             |
|---|-------------|-------------|-------------|
| C | 2.89225800  | -0.63998100 | 0.12048000  |
| C | 1.49442800  | -0.44959900 | 0.08286400  |
| C | 0.84217100  | 0.81059300  | -0.18564100 |
| H | 1.46814000  | 1.67900900  | -0.39065900 |
| C | -0.53551100 | 0.94477100  | -0.20504200 |
| H | -0.94839700 | 1.92629100  | -0.44307400 |
| C | -1.42619200 | -0.14617100 | 0.02624700  |
| C | -0.79368100 | -1.39694700 | 0.28670000  |
| H | -1.40888800 | -2.27134300 | 0.50481800  |
| C | 0.58304900  | -1.54487700 | 0.31933200  |

|   |             |             |             |
|---|-------------|-------------|-------------|
| H | 1.00800800  | -2.52491100 | 0.54639600  |
| C | -2.87740400 | 0.00711000  | -0.00020600 |
| C | -3.50893600 | 1.28045800  | 0.12543900  |
| H | -2.89217100 | 2.16506400  | 0.27436700  |
| C | -4.89778300 | 1.42632300  | 0.09511200  |
| H | -5.32924700 | 2.42306300  | 0.20169100  |
| C | -5.74207800 | 0.31015900  | -0.05111200 |
| H | -6.82526400 | 0.42479200  | -0.07038200 |
| C | -5.14546000 | -0.95849700 | -0.17210800 |
| H | -5.77189900 | -1.84327700 | -0.29795200 |
| C | -3.75661100 | -1.10629100 | -0.15343100 |
| H | -3.33379300 | -2.10094500 | -0.28474400 |
| P | 4.12114200  | 0.62690200  | -0.13904500 |
| H | 3.24751900  | -1.65709700 | 0.33280900  |
| C | 5.25370800  | 0.39814400  | 1.35689600  |
| H | 4.73421000  | 0.75955700  | 2.25302500  |
| H | 5.50595800  | -0.66392500 | 1.50602900  |
| H | 6.18533400  | 0.97229100  | 1.23504600  |
| C | 5.28514900  | -0.20058500 | -1.37605300 |
| H | 5.53168100  | -1.22819200 | -1.06420700 |
| H | 4.79026500  | -0.24514100 | -2.35414100 |
| H | 6.21877900  | 0.37358000  | -1.48019400 |

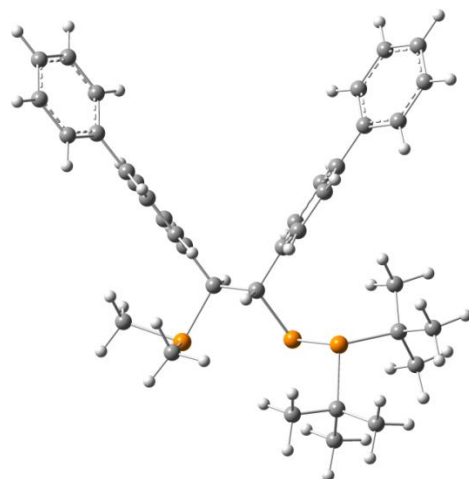

**Figure S62.** Optimized structure of **3a**.

Below are presented xyz coordinates for optimized geometry of **3a**:

|   |             |             |             |
|---|-------------|-------------|-------------|
| C | 0.23907600  | -4.17709100 | 0.71583200  |
| H | -0.67200200 | -3.83944900 | 1.23044900  |
| H | 1.11830200  | -3.70116700 | 1.16291700  |
| H | 0.33205500  | -5.26354300 | 0.84672100  |
| C | -1.49289500 | -4.56909800 | -1.45510800 |
| H | -1.37876700 | -5.66155800 | -1.41950000 |
| H | -1.82830600 | -4.30062700 | -2.46530200 |
| H | -2.26728600 | -4.26437500 | -0.73724400 |
| C | 4.71865200  | 0.81443900  | -0.15970400 |
| C | 5.72924400  | 0.40358100  | -1.24421100 |
| H | 6.13562900  | 1.30195800  | -1.74184600 |
| H | 5.23978900  | -0.21788900 | -2.00636500 |
| H | 6.57771500  | -0.15339800 | -0.82548000 |
| C | 5.42113600  | 1.61885800  | 0.95665900  |
| H | 6.22844800  | 1.05614200  | 1.43897500  |
| H | 4.69962000  | 1.91146000  | 1.73163000  |
| H | 5.86125000  | 2.53818100  | 0.53286600  |
| C | 3.66406000  | 1.73766400  | -0.80601100 |
| H | 4.16263000  | 2.63591100  | -1.20865100 |

|   |             |             |             |
|---|-------------|-------------|-------------|
| H | 2.91069400  | 2.06015500  | -0.07603400 |
| H | 3.14196900  | 1.21765200  | -1.61810800 |
| C | 4.96575700  | -2.06697500 | 1.03029700  |
| C | 5.50635600  | -2.83924000 | -0.18996300 |
| H | 6.16064900  | -2.22057500 | -0.81403700 |
| H | 4.67052700  | -3.19539200 | -0.80765900 |
| H | 6.08972300  | -3.71337000 | 0.15029000  |
| C | 6.14034700  | -1.56096300 | 1.88935900  |
| H | 6.70707100  | -2.42044900 | 2.28710900  |
| H | 5.78641600  | -0.96241500 | 2.74055000  |
| H | 6.83930900  | -0.95056000 | 1.30349900  |
| C | 4.13171300  | -3.05463900 | 1.87756700  |
| H | 3.28384100  | -3.42336100 | 1.28535800  |
| H | 3.74331700  | -2.57246200 | 2.78534700  |
| H | 4.75439300  | -3.91613400 | 2.17397000  |
| C | 0.79957000  | -1.16345700 | -0.27006900 |
| H | 0.78178000  | -1.53315600 | 0.76494400  |
| C | 0.50803400  | 0.31360000  | -0.23340900 |
| C | 0.24756700  | 1.05969900  | -1.40284400 |
| H | 0.27177500  | 0.55443400  | -2.36746800 |
| C | 0.01762100  | 2.43293100  | -1.35270800 |
| H | -0.14858200 | 2.98013400  | -2.28056800 |
| C | 0.05471300  | 3.14003200  | -0.12597000 |
| C | 0.31913100  | 2.39616500  | 1.04301800  |
| H | 0.32801500  | 2.90038400  | 2.00944200  |
| C | 0.52953400  | 1.01531700  | 0.99010200  |
| H | 0.73692400  | 0.46425600  | 1.90621400  |
| C | -0.17072300 | 4.59998500  | -0.07350400 |
| C | -1.05872200 | 5.23920400  | -0.97037200 |
| H | -1.60438900 | 4.63575700  | -1.69405200 |
| C | -1.27090700 | 6.62164300  | -0.92187500 |
| H | -1.96710700 | 7.08344800  | -1.62184900 |
| C | -0.60669000 | 7.41036500  | 0.03076800  |
| H | -0.77265700 | 8.48611000  | 0.07004000  |
| C | 0.27676100  | 6.79278000  | 0.93021400  |
| H | 0.81092200  | 7.39185500  | 1.66745300  |
| C | 0.49480800  | 5.41155500  | 0.87528700  |
| H | 1.21058900  | 4.95160700  | 1.55461600  |
| C | -0.24963900 | -1.94490500 | -1.10136200 |
| H | -0.13098300 | -1.66388300 | -2.15961100 |
| C | -1.67351800 | -1.66470900 | -0.69642100 |
| C | -2.06457300 | -1.54460200 | 0.65335500  |
| H | -1.30716700 | -1.58955400 | 1.43271500  |
| C | -3.39799500 | -1.32181700 | 1.00685300  |
| H | -3.65705500 | -1.19816800 | 2.05795500  |
| C | -4.40448800 | -1.19741900 | 0.02616800  |
| C | -4.01468000 | -1.30067200 | -1.32594900 |
| H | -4.76825300 | -1.22410700 | -2.10944700 |
| C | -2.68127500 | -1.52956100 | -1.67293000 |
| H | -2.40733900 | -1.61099500 | -2.72511200 |
| C | -5.81731300 | -0.95503600 | 0.40191200  |
| C | -6.37493000 | -1.54330400 | 1.55880500  |
| H | -5.75874000 | -2.20403700 | 2.16654300  |
| C | -7.70888800 | -1.31375900 | 1.91619300  |
| H | -8.11534300 | -1.78509100 | 2.81040200  |
| C | -8.52433800 | -0.49324900 | 1.12223600  |
| H | -9.56238100 | -0.31520300 | 1.39907900  |
| C | -7.98620200 | 0.09731600  | -0.03114500 |
| H | -8.60396800 | 0.74708100  | -0.65008800 |
| C | -6.65042200 | -0.12815300 | -0.38399400 |
| H | -6.23404200 | 0.36164700  | -1.26270400 |
| P | 2.54983200  | -1.52799800 | -1.01455600 |
| P | 3.70600000  | -0.64495800 | 0.62748200  |
| P | 0.20454800  | -3.81345500 | -1.11695300 |



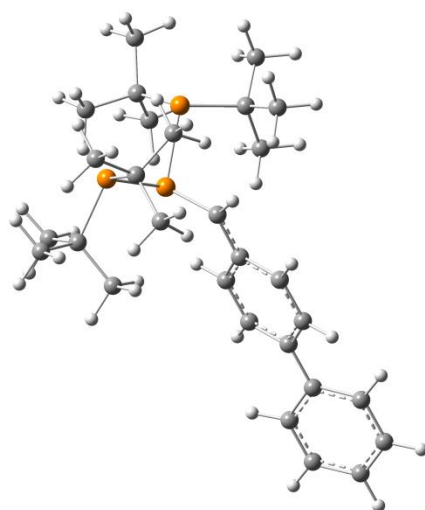

**Figure S63.** Optimized structure of **2\_1**.

Below are presented xyz coordinates for optimized geometry of **2\_1**:

|   |             |             |             |
|---|-------------|-------------|-------------|
| C | -3.41326500 | -2.19673800 | 1.42844600  |
| C | -3.93380800 | -0.92661300 | 2.13692800  |
| H | -4.44786300 | -1.22000200 | 3.06764000  |
| H | -4.63614100 | -0.36496100 | 1.50880600  |
| H | -3.11012600 | -0.25380200 | 2.40063200  |
| C | -2.36044800 | -2.85431900 | 2.33715300  |
| H | -1.46821100 | -2.22006700 | 2.41688000  |
| H | -2.05910200 | -3.84248100 | 1.96857400  |
| H | -2.77894500 | -2.99095400 | 3.34889400  |
| C | -4.62286100 | -3.14097500 | 1.23712400  |
| H | -4.34355700 | -4.09641800 | 0.78028900  |
| H | -5.38614600 | -2.67018400 | 0.60336400  |
| H | -5.07614000 | -3.35747000 | 2.21936700  |
| C | -1.64020300 | -3.02184000 | -1.00352800 |
| C | -0.27869400 | -3.22813600 | -0.30737800 |
| H | 0.28409100  | -4.00631600 | -0.85021200 |
| H | -0.39075400 | -3.55972000 | 0.72929700  |
| H | 0.31932700  | -2.31220900 | -0.32240800 |
| C | -2.40952400 | -4.36040200 | -1.02053600 |
| H | -3.40956100 | -4.24908600 | -1.46239200 |
| H | -2.51648100 | -4.78404000 | -0.01405000 |
| H | -1.84614500 | -5.08835800 | -1.62741100 |
| C | -1.38297800 | -2.60425700 | -2.47163500 |
| H | -0.80816400 | -3.39574100 | -2.98034400 |
| H | -0.79661900 | -1.67915000 | -2.50968800 |
| H | -2.32688400 | -2.45359000 | -3.01358300 |
| C | -0.02512000 | 0.11766600  | -0.93671300 |
| H | -0.28788500 | 0.32696000  | -1.97424300 |
| C | 1.36403600  | 0.05803300  | -0.64815600 |
| C | 2.33645500  | 0.28109000  | -1.68459500 |
| H | 1.97476700  | 0.51387300  | -2.68803500 |
| C | 3.70216900  | 0.23042100  | -1.44962400 |
| H | 4.37819000  | 0.44183900  | -2.27914300 |
| C | 4.24278500  | -0.03909800 | -0.16149500 |
| C | 3.29035900  | -0.26120000 | 0.87064800  |
| H | 3.64034500  | -0.51012600 | 1.87330800  |

|   |             |             |             |
|---|-------------|-------------|-------------|
| C | 1.92147000  | -0.22383700 | 0.64721700  |
| H | 1.23753500  | -0.42716600 | 1.47188800  |
| C | 5.68653000  | -0.08589700 | 0.08426800  |
| C | 6.61867000  | -0.34232000 | -0.95950000 |
| H | 6.24800700  | -0.54078200 | -1.96381500 |
| C | 7.99619300  | -0.38021300 | -0.72563700 |
| H | 8.67242100  | -0.58675800 | -1.55623900 |
| C | 8.51394800  | -0.17663600 | 0.56529800  |
| H | 9.58722100  | -0.21095900 | 0.74797400  |
| C | 7.61229600  | 0.07222400  | 1.61476800  |
| H | 7.98749000  | 0.24462400  | 2.62434500  |
| C | 6.23536600  | 0.12240100  | 1.38017300  |
| H | 5.56656300  | 0.35349700  | 2.20754900  |
| C | -1.68323100 | 2.92375900  | 1.32188700  |
| C | -2.28172200 | 4.34276000  | 1.22598400  |
| H | -1.84248700 | 4.97705800  | 2.01362000  |
| H | -3.37171300 | 4.32953800  | 1.36558300  |
| H | -2.06060600 | 4.81570400  | 0.26124300  |
| C | -0.15958100 | 2.98244700  | 1.08894000  |
| H | 0.28873700  | 3.67708900  | 1.81995700  |
| H | 0.09904600  | 3.33132300  | 0.08524700  |
| H | 0.30531100  | 1.99956200  | 1.22610600  |
| C | -1.92866300 | 2.39677500  | 2.75647900  |
| H | -1.51132500 | 1.38831000  | 2.87433300  |
| H | -3.00073700 | 2.36268600  | 2.99330500  |
| H | -1.43031300 | 3.06128100  | 3.48115200  |
| C | -2.68318700 | 2.40873700  | -1.60105000 |
| C | -3.86341200 | 3.40594800  | -1.70693800 |
| H | -3.71233700 | 4.29618100  | -1.08559000 |
| H | -4.80506000 | 2.93164400  | -1.40051400 |
| H | -3.96620000 | 3.73929600  | -2.75362700 |
| C | -1.39099400 | 3.09069000  | -2.08792700 |
| H | -1.48321600 | 3.32149000  | -3.16309900 |
| H | -0.51928100 | 2.44493600  | -1.94093800 |
| H | -1.21378800 | 4.03811500  | -1.56296600 |
| C | -3.01714900 | 1.20844400  | -2.51498100 |
| H | -3.90800200 | 0.67311800  | -2.16272900 |
| H | -2.19729800 | 0.48475100  | -2.55680800 |
| H | -3.20791400 | 1.57426100  | -3.53761200 |
| P | -2.79730300 | -1.63658900 | -0.31867600 |
| P | -1.27510100 | -0.03636100 | 0.31041300  |
| P | -2.68377500 | 1.71959800  | 0.19642100  |

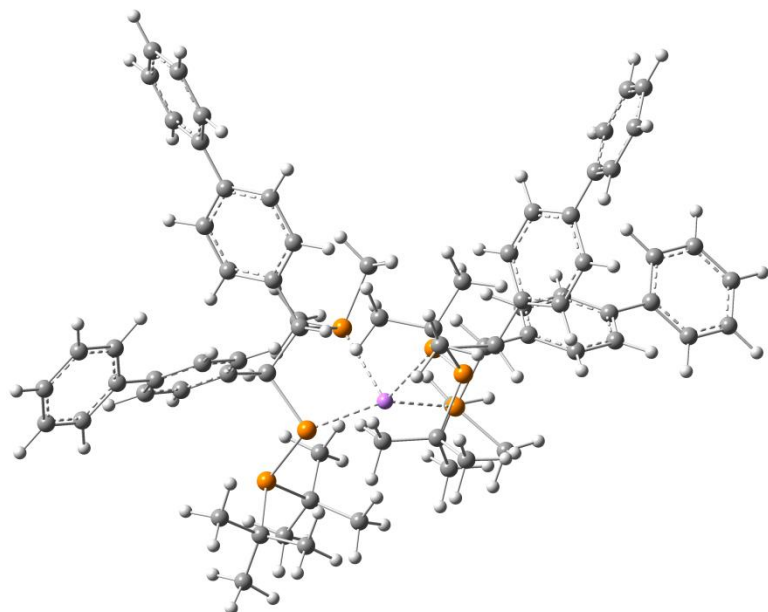

**Figure S64.** Optimized structure of **1a\***.

Below are presented xyz coordinates for optimized geometry of **1a\***:

|   |             |             |             |
|---|-------------|-------------|-------------|
| C | -0.11508700 | -1.67252000 | 4.02381400  |
| C | -1.03406800 | -0.73567800 | -3.71240300 |
| H | -1.51934300 | 0.16191100  | -4.11917300 |
| H | -1.73374800 | -1.57743000 | -3.74263900 |
| H | -0.17024100 | -0.99017000 | -4.34033200 |
| C | 0.54897300  | 1.09628900  | -2.23288800 |
| H | 1.45317600  | 0.84360900  | -2.80403500 |
| H | 0.85127300  | 1.47579700  | -1.24868200 |
| H | -0.01447700 | 1.86724100  | -2.77393200 |
| C | 0.43619300  | -2.93758500 | 3.33258300  |
| H | -0.05065100 | -3.83139500 | 3.75380700  |
| H | 1.52198500  | -3.03064700 | 3.48269200  |
| H | 0.24236500  | -2.91160800 | 2.25310700  |
| C | 2.75997900  | -3.48480600 | -2.18083300 |
| H | 3.85257200  | -3.53420600 | -2.27385300 |
| H | 2.35662800  | -2.83935300 | -2.97072400 |
| H | 2.33312800  | -4.48615700 | -2.31612000 |
| C | 0.11891800  | -1.83572400 | 5.54484300  |
| H | -0.26134700 | -0.98201000 | 6.11691300  |
| H | 1.18923600  | -1.94359300 | 5.76758400  |
| H | -0.40312500 | -2.73822600 | 5.90378400  |
| C | -1.61984400 | -1.56403800 | 3.72918100  |
| H | -2.12772600 | -2.49011100 | 4.04630600  |
| H | -1.81448500 | -1.43879300 | 2.65673700  |
| H | -2.08231000 | -0.73413500 | 4.27823100  |
| C | 0.06523400  | 1.44355500  | 3.75442000  |
| C | -0.34070600 | 1.55854900  | 5.23675300  |
| H | 0.50725200  | 1.34144300  | 5.90112100  |
| H | -1.16374000 | 0.87858700  | 5.48964600  |
| H | -0.68356700 | 2.58514700  | 5.44571600  |
| C | -1.15971200 | 1.69670300  | 2.85335200  |
| H | -1.96934500 | 0.98400300  | 3.04087800  |
| H | -0.86295100 | 1.61869700  | 1.79895200  |
| H | -1.55049400 | 2.71341700  | 3.02825400  |
| C | 1.12384900  | 2.52863400  | 3.44621300  |
| H | 0.68297900  | 3.52806000  | 3.59610600  |
| H | 1.46748100  | 2.44864200  | 2.40653000  |

|   |             |             |             |
|---|-------------|-------------|-------------|
| H | 1.99884200  | 2.42962200  | 4.10152800  |
| C | 2.90061400  | -0.59912200 | 1.01368700  |
| H | 3.19685200  | -1.33574400 | 1.77299200  |
| C | 3.67565200  | 0.66835800  | 1.26733400  |
| C | 3.73380800  | 1.71348200  | 0.32209700  |
| H | 3.22517900  | 1.59887200  | -0.63371100 |
| C | 4.39990600  | 2.90610500  | 0.60113100  |
| H | 4.40182500  | 3.70378000  | -0.14120400 |
| C | 5.03045000  | 3.11652300  | 1.84949100  |
| C | 4.97303300  | 2.07207400  | 2.79377000  |
| H | 5.47160500  | 2.19047200  | 3.75556300  |
| C | 4.31847600  | 0.87081300  | 2.50398600  |
| H | 4.27844600  | 0.08104600  | 3.25233100  |
| C | 5.72444500  | 4.38896400  | 2.15317000  |
| C | 6.42991800  | 5.09447400  | 1.15263100  |
| H | 6.48360100  | 4.67746900  | 0.14818300  |
| C | 7.08348700  | 6.29860600  | 1.43987800  |
| H | 7.62591200  | 6.81814100  | 0.65059400  |
| C | 7.05503700  | 6.82878200  | 2.73876600  |
| H | 7.56429900  | 7.76485400  | 2.96308300  |
| C | 6.36036900  | 6.13963800  | 3.74455400  |
| H | 6.31892600  | 6.54547200  | 4.75479200  |
| C | 5.70128400  | 4.93927600  | 3.45452200  |
| H | 5.13689000  | 4.43078100  | 4.23452800  |
| C | 3.13939700  | -1.18964200 | -0.39925000 |
| H | 2.60977600  | -0.56421800 | -1.13462900 |
| C | 4.58791700  | -1.28316500 | -0.81024900 |
| C | 4.97059200  | -1.01370500 | -2.13871200 |
| H | 4.20672700  | -0.72105000 | -2.85948500 |
| C | 6.30225300  | -1.11531900 | -2.55025300 |
| H | 6.55928400  | -0.92164800 | -3.59102400 |
| C | 7.31349800  | -1.49279700 | -1.64247200 |
| C | 6.93381100  | -1.75449700 | -0.30919000 |
| H | 7.69819100  | -2.00259400 | 0.42606800  |
| C | 5.60135700  | -1.64870500 | 0.09799300  |
| H | 5.34707200  | -1.81633400 | 1.14245000  |
| C | 3.17216100  | -3.94752300 | 0.60269900  |
| H | 2.76543500  | -4.96286400 | 0.51585000  |
| H | 3.04080600  | -3.61879800 | 1.63943500  |
| H | 4.24098900  | -3.96210200 | 0.35191500  |
| C | 8.72876000  | -1.60105500 | -2.07197200 |
| C | 9.27320300  | -0.70643900 | -3.01885000 |
| H | 8.64904000  | 0.09293900  | -3.41492400 |
| C | 10.60828800 | -0.81170900 | -3.42658800 |
| H | 11.00718200 | -0.10355800 | -4.15167700 |
| C | 11.43480700 | -1.81198400 | -2.89336500 |
| H | 12.47397900 | -1.89235700 | -3.20821200 |
| C | 10.90936900 | -2.70634300 | -1.94901200 |
| H | 11.53817000 | -3.49253800 | -1.53320100 |
| C | 9.57278400  | -2.60307500 | -1.54563600 |
| H | 9.16686200  | -3.31900400 | -0.83269700 |
| C | -4.14272900 | -4.98948900 | 0.49273200  |
| C | -3.31624900 | -5.02270100 | 1.79401200  |
| H | -3.93693200 | -5.41867100 | 2.61572700  |
| H | -2.99241000 | -4.00922100 | 2.06349400  |
| H | -2.42953100 | -5.66083900 | 1.70591700  |
| C | -4.58439100 | -6.41869200 | 0.12342000  |
| H | -3.73147200 | -7.10847100 | 0.08510000  |
| H | -5.09943100 | -6.44612200 | -0.84696500 |
| H | -5.27947500 | -6.79888200 | 0.88998600  |
| C | -5.40366700 | -4.13020200 | 0.74802600  |
| H | -5.96603000 | -4.54457500 | 1.60098400  |
| H | -6.06178700 | -4.11608700 | -0.13110300 |
| H | -5.12315100 | -3.09537800 | 0.98325700  |

|    |              |             |             |
|----|--------------|-------------|-------------|
| C  | -1.81376000  | -5.18108400 | -1.61410000 |
| C  | -0.82596900  | -5.62786700 | -0.52374400 |
| H  | -1.27031100  | -6.37807300 | 0.14193600  |
| H  | -0.50309000  | -4.77018500 | 0.08305400  |
| H  | 0.07185600   | -6.07722200 | -0.98276000 |
| C  | -2.34374100  | -6.40672200 | -2.39151700 |
| H  | -1.50722200  | -6.90885500 | -2.90620200 |
| H  | -3.07655800  | -6.09956300 | -3.15019300 |
| H  | -2.81982700  | -7.14419100 | -1.73725600 |
| C  | -1.06780500  | -4.28621400 | -2.62536500 |
| H  | -0.64629500  | -3.39950700 | -2.13431300 |
| H  | -1.74505300  | -3.94706400 | -3.42195300 |
| H  | -0.24715400  | -4.85609900 | -3.09100900 |
| C  | -3.05705300  | -0.95378700 | -1.09410800 |
| H  | -3.20615600  | -1.34810000 | -2.10780800 |
| C  | -4.39837000  | -0.51258700 | -0.56210300 |
| C  | -4.51696500  | 0.31129500  | 0.57655700  |
| H  | -3.61803600  | 0.65822300  | 1.08290900  |
| C  | -5.76654900  | 0.66534000  | 1.08363800  |
| H  | -5.82267200  | 1.28225300  | 1.98003600  |
| C  | -6.95938500  | 0.20253500  | 0.48185900  |
| C  | -6.83967600  | -0.62432300 | -0.65409700 |
| H  | -7.73921700  | -0.97678500 | -1.15848700 |
| C  | -5.58559600  | -0.96635400 | -1.16824200 |
| H  | -5.51518100  | -1.61189500 | -2.04351600 |
| C  | -8.28628400  | 0.57370200  | 1.02443300  |
| C  | -8.51351700  | 1.84757600  | 1.59240200  |
| H  | -7.70275600  | 2.57421500  | 1.60506900  |
| C  | -9.76717300  | 2.19774700  | 2.10733900  |
| H  | -9.91580200  | 3.18954800  | 2.53318600  |
| C  | -10.83250700 | 1.28544600  | 2.06322100  |
| H  | -11.80843900 | 1.55806000  | 2.46227300  |
| C  | -10.62441800 | 0.01689200  | 1.50053100  |
| H  | -11.43869000 | -0.70646900 | 1.47030600  |
| C  | -9.36832900  | -0.33480200 | 0.99251800  |
| H  | -9.20930400  | -1.33358000 | 0.58904300  |
| C  | -2.00326800  | 0.18514200  | -1.11286500 |
| H  | -1.64146500  | 0.35669400  | -0.08630800 |
| C  | -2.48848400  | 1.49935300  | -1.67127500 |
| C  | -3.38146600  | 1.57018300  | -2.75872400 |
| H  | -3.78650700  | 0.65178600  | -3.17900900 |
| C  | -3.79534600  | 2.80154800  | -3.27461000 |
| H  | -4.51734600  | 2.82312200  | -4.09010000 |
| C  | -3.33776800  | 4.01554000  | -2.72064100 |
| C  | -2.44954000  | 3.94474800  | -1.62643200 |
| H  | -2.06157200  | 4.86332900  | -1.18785100 |
| C  | -2.03571000  | 2.71239400  | -1.11525500 |
| H  | -1.34347300  | 2.68138900  | -0.27448100 |
| C  | -3.78306300  | 5.32148400  | -3.26364500 |
| C  | -3.99850700  | 5.49891400  | -4.64790100 |
| H  | -3.80901300  | 4.66773000  | -5.32532500 |
| C  | -4.42074200  | 6.73089500  | -5.16152000 |
| H  | -4.57287900  | 6.84349500  | -6.23430400 |
| C  | -4.63372900  | 7.82015500  | -4.30350800 |
| H  | -4.96044400  | 8.77919200  | -4.70245300 |
| C  | -4.42197200  | 7.66049700  | -2.92589100 |
| H  | -4.59356600  | 8.49502500  | -2.24722400 |
| C  | -4.00477800  | 6.42659700  | -2.41298300 |
| H  | -3.87243500  | 6.30516600  | -1.33919100 |
| Li | -0.03920300  | -2.04303500 | -0.05123400 |
| P  | 1.01139500   | -0.23589000 | 1.22960100  |
| P  | 0.99492100   | -0.21196300 | 3.41458600  |
| P  | 2.20153500   | -2.83795000 | -0.52691800 |
| P  | -2.41797600  | -2.38612300 | 0.03319700  |

|   |             |             |             |
|---|-------------|-------------|-------------|
| P | -3.29919500 | -4.09421200 | -1.00132600 |
| P | -0.43330200 | -0.46419200 | -1.96982900 |

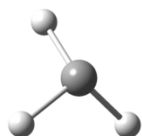

**Figure S65.** Optimized structure of  $[\text{Me}]^-$ .

Below are presented xyz coordinates for optimized geometry of  $[\text{Me}]^-$  :

|   |             |             |             |
|---|-------------|-------------|-------------|
| C | 0.00001700  | 0.00000400  | -0.12526200 |
| H | -0.58142900 | 0.86693100  | 0.25051400  |
| H | -0.46017600 | -0.93694800 | 0.25050700  |
| H | 1.04150100  | 0.06999300  | 0.25054900  |

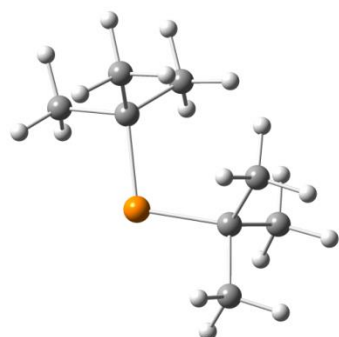

**Figure S66.** Optimized structure of  $[\text{PtBu}_2]^-$ .

Below are presented xyz coordinates for optimized geometry of  $[\text{PtBu}_2]^-$  :

|   |             |             |             |
|---|-------------|-------------|-------------|
| C | 1.55742800  | 0.02301300  | 0.00181300  |
| C | 1.89225500  | 0.61258100  | -1.39166500 |
| H | 1.11105700  | 1.30044100  | -1.73692600 |
| H | 2.85107700  | 1.17247200  | -1.37085100 |
| H | 1.97241000  | -0.19441700 | -2.13101400 |
| C | 2.71873100  | -0.92293500 | 0.38999200  |
| H | 2.75923600  | -1.78534900 | -0.29178700 |
| H | 3.68871600  | -0.39306300 | 0.33474000  |
| H | 2.58108000  | -1.30601000 | 1.40986900  |
| C | 1.52856200  | 1.17188400  | 1.03227300  |
| H | 0.76466100  | 1.92106100  | 0.78279400  |
| H | 1.30804100  | 0.78275900  | 2.03509200  |
| H | 2.50480300  | 1.69718400  | 1.06459200  |
| C | -1.55742600 | 0.02301200  | -0.00181400 |
| C | -1.89225600 | 0.61258100  | 1.39166500  |
| H | -1.97241300 | -0.19441700 | 2.13101300  |
| H | -1.11105800 | 1.30044000  | 1.73692800  |
| H | -2.85107800 | 1.17247300  | 1.37084900  |
| C | -2.71873000 | -0.92293500 | -0.38999200 |
| H | -2.75923600 | -1.78534900 | 0.29178800  |
| H | -3.68871500 | -0.39306300 | -0.33474100 |
| H | -2.58107900 | -1.30601200 | -1.40986800 |
| C | -1.52856200 | 1.17188400  | -1.03227300 |
| H | -0.76466100 | 1.92106100  | -0.78279600 |
| H | -1.30804200 | 0.78276000  | -2.03509200 |
| H | -2.50480400 | 1.69718200  | -1.06459000 |
| P | 0.00000000  | -1.13364400 | 0.00000000  |

## PART D. References

1. G. Sheldrick, A short history of SHELX, *Acta Crystallogr. A*, 2008, **64**, 112-122.
2. L. Farrugia, WinGX and ORTEP for Windows: an update, *J. Appl. Cryst.*, 2012, **45**, 849-854.
3. M. J. Frisch, G. W. Trucks, H. B. Schlegel, G. E. Scuseria, M. A. Robb, J. R. Cheeseman, G. Scalmani, V. Barone, G. A. Petersson, H. Nakatsuji, X. Li, M. Caricato, A. V. Marenich, J. Bloino, B. G. Janesko, R. Gomperts, B. Mennucci, H. P. Hratchian, J. V. Ortiz, A. F. Izmaylov, J. L. Sonnenberg, Williams, F. Ding, F. Lipparini, F. Egidi, J. Goings, B. Peng, A. Petrone, T. Henderson, D. Ranasinghe, V. G. Zakrzewski, J. Gao, N. Rega, G. Zheng, W. Liang, M. Hada, M. Ehara, K. Toyota, R. Fukuda, J. Hasegawa, M. Ishida, T. Nakajima, Y. Honda, O. Kitao, H. Nakai, T. Vreven, K. Throssell, J. A. Montgomery Jr., J. E. Peralta, F. Ogliaro, M. J. Bearpark, J. J. Heyd, E. N. Brothers, K. N. Kudin, V. N. Staroverov, T. A. Keith, R. Kobayashi, J. Normand, K. Raghavachari, A. P. Rendell, J. C. Burant, S. S. Iyengar, J. Tomasi, M. Cossi, J. M. Millam, M. Klene, C. Adamo, R. Cammi, J. W. Ochterski, R. L. Martin, K. Morokuma, O. Farkas, J. B. Foresman and D. J. Fox, Gaussian 16 Rev. B.01. *Journal*, 2016.
4. J. Tao, J. P. Perdew, V. N. Staroverov and G. E. Scuseria, Climbing the Density Functional Ladder: Nonempirical Meta--Generalized Gradient Approximation Designed for Molecules and Solids, *Phys. Rev. Lett.*, 2003, **91**, 146401.
5. S. Grimme, S. Ehrlich and L. Goerigk, Effect of the damping function in dispersion corrected density functional theory, *J. Comput. Chem.*, 2011, **32**, 1456-1465.
